# Supplementary material for: Blue CdSe/CdS core/crown nanoplatelet light-emitting diodes obtained via a design-of-experiments approach
Source: Royal Society of Chemistry journal article supplement (doi:10.1039/d4nr03461a), 2024-11-13
Supplement: d4nr03461a1.zip [file d4nr03461a1.zip]

## Sheet: Foglio1
Figure 6b
x-axis	y-axis (left)
	3 (V)	3.5 (V)	6 (V)	10 (V)
Wavelength (nm)	Luminescence (arb.u.)
343.641	1	0	20	4
343.905	-2	8	10	19
344.169	-9	-4	-3	1
344.433	-4	6	10	2
344.697	6	3	4	15
344.961	-10	-1	-3	11
345.224	2	-1	8	17
345.488	11	15	10	15
345.752	-5	5	4	10
346.016	5	8	7	16
346.28	1	-3	12	3
346.544	7	12	1	14
346.808	3	8	4	19
347.072	6	0	16	15
347.336	4	3	11	16
347.6	1	-4	0	-6
347.864	-5	2	6	12
348.128	-1	11	11	8
348.392	1	7	12	15
348.656	-7	9	7	14
348.92	4	1	12	15
349.184	1	5	16	17
349.447	1	1	10	5
349.711	-1	6	9	10
349.975	10	1	8	11
350.239	-5	-4	11	15
350.503	5	9	14	14
350.767	-1	5	17	8
351.031	-1	2	17	22
351.295	-10	7	11	5
351.559	-6	-2	-1	8
351.823	8	-4	11	12
352.087	-2	9	10	11
352.351	-7	1	2	11
352.615	-1	3	9	10
352.878	5	9	9	12
353.142	2	10	5	13
353.406	1	6	8	15
353.67	-1	9	9	11
353.934	-2	0	11	8
354.198	0	12	13	14
354.462	-1	-8	5	18
354.726	-4	7	8	12
354.99	-1	9	12	9
355.254	4	10	9	5
355.518	-1	1	7	15
355.782	-4	10	18	12
356.045	-4	2	12	16
356.309	11	1	9	19
356.573	3	1	15	11
356.837	4	9	4	1
357.101	-3	11	1	14
357.365	2	9	19	18
357.629	8	9	12	20
357.893	9	0	8	6
358.157	-13	4	16	8
358.421	6	-3	8	20
358.685	3	5	6	9
358.948	-2	3	5	15
359.212	-2	-5	-1	11
359.476	3	12	15	11
359.74	6	2	9	15
360.004	-1	3	5	15
360.268	2	1	25	26
360.532	-1	9	9	17
360.796	6	11	9	14
361.06	5	4	15	18
361.324	-3	6	19	14
361.587	-9	18	19	12
361.851	7	4	12	26
362.115	2	5	16	24
362.379	1	6	2	13
362.643	0	15	14	26
362.907	-3	5	8	16
363.171	-8	3	19	32
363.435	-6	7	20	27
363.699	2	3	7	39
363.962	3	-2	30	31
364.226	-6	6	16	27
364.49	-9	6	8	35
364.754	0	4	13	35
365.018	-1	6	13	18
365.282	-5	9	19	26
365.546	-2	7	19	30
365.81	2	9	21	37
366.074	-6	10	16	32
366.337	-6	13	26	21
366.601	1	14	18	32
366.865	9	10	32	28
367.129	-1	-4	19	45
367.393	-1	1	16	37
367.657	-2	10	23	47
367.921	-4	4	26	52
368.185	4	5	23	43
368.448	-1	6	22	36
368.712	5	2	19	45
368.976	2	7	28	51
369.24	-1	5	31	59
369.504	-2	9	28	64
369.768	0	10	30	45
370.032	-3	10	20	46
370.296	-1	15	32	48
370.559	2	7	29	36
370.823	-2	12	37	70
371.087	-3	16	22	60
371.351	12	9	26	62
371.615	-7	13	34	49
371.879	-1	9	25	73
372.143	-7	7	28	69
372.407	-3	12	36	53
372.67	1	11	31	66
372.934	-7	2	32	70
373.198	4	10	38	76
373.462	2	18	35	83
373.726	-1	14	33	71
373.99	-2	5	41	83
374.254	-4	10	47	80
374.517	-4	19	39	75
374.781	1	4	29	76
375.045	8	20	35	93
375.309	-5	17	44	79
375.573	0	3	40	99
375.837	0	15	52	97
376.101	11	20	53	82
376.364	6	13	44	94
376.628	-1	15	54	102
376.892	-4	13	43	100
377.156	0	16	69	100
377.42	4	21	48	100
377.684	3	15	55	104
377.947	-8	18	52	125
378.211	3	16	63	106
378.475	-1	17	62	94
378.739	2	20	52	109
379.003	8	26	59	109
379.267	0	22	68	122
379.53	10	16	68	136
379.794	7	9	79	125
380.058	12	32	64	130
380.322	-2	23	54	127
380.586	3	2	65	121
380.85	5	14	66	125
381.114	-3	20	67	141
381.377	-4	19	58	133
381.641	-3	23	59	132
381.905	-4	15	75	123
382.169	-5	17	69	150
382.433	2	22	69	150
382.697	4	21	67	165
382.96	-2	17	75	160
383.224	4	25	65	143
383.488	0	23	75	153
383.752	3	18	85	142
384.016	6	21	85	189
384.279	3	25	79	170
384.543	8	26	89	173
384.807	7	27	102	180
385.071	-1	28	89	172
385.335	8	27	90	158
385.599	-3	31	92	170
385.862	11	29	83	177
386.126	7	23	80	166
386.39	4	25	89	179
386.654	-5	27	101	182
386.918	0	33	95	173
387.181	6	19	105	172
387.445	1	19	98	179
387.709	-10	20	81	179
387.973	8	25	102	189
388.237	4	22	86	195
388.501	9	30	97	202
388.764	8	34	101	193
389.028	10	23	111	191
389.292	-2	18	108	197
389.556	0	11	102	191
389.82	6	24	96	218
390.083	3	24	121	211
390.347	-3	20	113	219
390.611	9	26	107	222
390.875	2	21	91	226
391.139	-4	26	123	204
391.402	12	31	108	203
391.666	2	28	93	227
391.93	6	38	109	205
392.194	11	33	110	234
392.458	2	27	115	243
392.721	7	24	113	219
392.985	3	32	117	221
393.249	1	27	115	211
393.513	5	28	117	214
393.776	3	26	118	242
394.04	4	32	132	225
394.304	-6	30	121	239
394.568	4	30	120	224
394.832	-1	27	125	227
395.095	14	32	119	249
395.359	3	38	142	241
395.623	5	21	125	240
395.887	16	41	148	246
396.151	-4	29	127	235
396.414	4	40	116	257
396.678	5	29	131	267
396.942	4	38	139	242
397.206	12	28	130	269
397.469	-6	29	127	265
397.733	4	22	130	261
397.997	-1	33	116	251
398.261	2	44	134	286
398.525	0	42	137	261
398.788	4	32	148	265
399.052	-10	38	142	296
399.316	7	24	143	302
399.58	3	28	138	279
399.843	2	43	138	283
400.107	6	37	129	267
400.371	12	25	140	288
400.635	3	37	139	273
400.898	1	32	121	286
401.162	7	39	155	266
401.426	2	25	153	262
401.69	4	34	152	304
401.954	4	35	127	287
402.217	10	40	152	277
402.481	4	40	150	312
402.745	-1	32	135	284
403.009	12	26	135	302
403.272	8	46	161	287
403.536	3	41	168	307
403.8	11	29	155	289
404.064	12	47	163	302
404.327	0	48	158	300
404.591	5	33	149	295
404.855	-2	35	157	290
405.119	-2	38	155	274
405.382	6	36	151	330
405.646	2	37	165	299
405.91	8	26	132	322
406.174	8	49	150	324
406.437	-1	59	140	333
406.701	19	42	167	322
406.965	6	36	162	349
407.229	3	24	152	316
407.492	12	40	157	337
407.756	10	47	153	324
408.02	-8	40	149	300
408.283	-7	33	170	346
408.547	8	40	154	345
408.811	6	42	160	311
409.075	6	44	154	329
409.338	-1	39	160	339
409.602	8	41	146	329
409.866	2	39	153	328
410.13	5	51	169	331
410.393	18	49	155	324
410.657	0	37	183	318
410.921	3	48	155	327
411.185	3	34	174	349
411.448	5	53	159	329
411.712	5	44	164	351
411.976	5	40	160	355
412.239	-3	33	181	362
412.503	6	42	165	352
412.767	-5	35	185	342
413.031	13	46	177	363
413.294	9	30	182	358
413.558	14	39	179	353
413.822	11	36	177	344
414.085	4	54	165	378
414.349	15	50	174	369
414.613	0	50	178	355
414.877	2	49	168	389
415.14	8	45	196	341
415.404	6	32	167	354
415.668	14	44	182	355
415.931	10	47	160	362
416.195	7	45	190	382
416.459	4	40	174	349
416.723	8	50	198	368
416.986	1	41	184	386
417.25	11	34	189	390
417.514	2	39	178	346
417.777	11	46	201	399
418.041	12	43	201	353
418.305	6	59	196	405
418.568	13	46	185	379
418.832	6	46	189	404
419.096	13	42	177	368
419.359	12	50	168	378
419.623	4	53	174	376
419.887	2	47	199	405
420.151	-3	49	171	366
420.414	7	51	209	390
420.678	10	39	190	395
420.942	11	48	183	396
421.205	10	48	181	386
421.469	6	47	208	396
421.733	-4	48	182	404
421.996	11	57	193	410
422.26	11	56	196	391
422.524	1	42	182	379
422.787	16	43	204	437
423.051	19	60	188	404
423.315	6	46	182	428
423.578	10	47	208	378
423.842	10	44	195	433
424.106	9	54	199	405
424.369	0	54	193	393
424.633	6	58	183	411
424.897	-4	47	216	411
425.16	-3	48	188	405
425.424	12	49	206	442
425.688	12	49	208	417
425.951	8	45	188	404
426.215	13	63	210	411
426.479	5	40	201	404
426.742	4	61	170	413
427.006	17	48	197	404
427.27	14	50	189	419
427.533	10	44	201	423
427.797	-2	42	185	426
428.061	7	57	204	394
428.324	12	45	189	408
428.588	13	50	203	456
428.852	8	54	199	429
429.115	5	50	216	411
429.379	14	54	200	433
429.643	18	56	194	438
429.906	6	38	201	415
430.17	12	59	202	432
430.434	11	53	216	411
430.697	4	50	196	426
430.961	0	46	220	410
431.225	14	57	228	411
431.488	8	39	186	424
431.752	-2	44	203	411
432.015	14	42	209	425
432.279	10	62	203	436
432.543	0	51	218	428
432.806	10	55	196	453
433.07	11	52	199	419
433.334	7	52	221	400
433.597	13	59	190	419
433.861	6	47	222	416
434.125	8	59	211	417
434.388	9	51	237	433
434.652	12	50	208	437
434.915	6	53	196	458
435.179	8	54	220	402
435.443	7	54	212	451
435.706	10	58	220	446
435.97	12	60	211	437
436.234	6	57	224	451
436.497	11	51	210	446
436.761	12	68	214	414
437.024	9	64	228	468
437.288	21	61	223	432
437.552	5	55	216	461
437.815	0	57	224	454
438.079	1	64	234	438
438.342	14	51	241	463
438.606	8	59	217	423
438.87	12	66	232	453
439.133	5	57	216	422
439.397	15	40	223	432
439.661	6	72	242	458
439.924	18	62	211	487
440.188	9	57	235	459
440.451	11	68	249	452
440.715	4	80	253	463
440.979	6	63	253	456
441.242	9	70	262	470
441.506	15	68	253	472
441.769	10	63	253	465
442.033	11	79	248	489
442.297	13	73	254	540
442.56	4	61	258	486
442.824	8	75	249	512
443.087	4	66	247	522
443.351	10	79	272	505
443.615	4	86	275	555
443.878	11	74	276	530
444.142	2	77	310	534
444.405	15	93	304	550
444.669	11	73	299	583
444.932	13	75	315	582
445.196	15	78	306	620
445.46	7	84	324	635
445.723	10	81	362	582
445.987	15	93	336	632
446.25	23	97	358	637
446.514	12	110	373	710
446.777	16	83	370	714
447.041	14	113	403	684
447.305	8	116	416	739
447.568	16	118	418	755
447.832	29	124	445	784
448.095	13	125	483	785
448.359	32	122	471	836
448.622	26	132	487	849
448.886	18	151	500	902
449.15	22	154	555	931
449.413	22	163	588	964
449.677	26	189	604	1029
449.94	31	182	673	1115
450.204	31	202	658	1138
450.467	38	199	708	1194
450.731	42	196	676	1232
450.995	28	231	754	1297
451.258	49	242	827	1329
451.522	47	247	839	1424
451.785	48	292	926	1508
452.049	49	290	1011	1561
452.312	53	313	1011	1657
452.576	62	353	1136	1752
452.839	57	360	1188	1823
453.103	55	376	1267	1959
453.366	70	395	1302	2004
453.63	74	388	1370	2203
453.894	66	463	1507	2357
454.157	84	449	1575	2433
454.421	69	506	1597	2621
454.684	101	540	1818	2808
454.948	91	606	1871	2931
455.211	104	605	2015	3121
455.475	124	659	2220	3334
455.738	125	709	2340	3500
456.002	124	732	2488	3813
456.265	140	809	2689	3973
456.529	143	844	2785	4228
456.792	168	883	2978	4520
457.056	157	986	3184	4729
457.319	160	965	3307	5016
457.583	180	1040	3463	5258
457.847	202	1162	3700	5553
458.11	209	1178	3829	5819
458.374	221	1255	4127	6180
458.637	244	1346	4204	6538
458.901	230	1417	4458	6727
459.164	243	1460	4658	7177
459.428	243	1480	4968	7397
459.691	291	1586	5030	7750
459.955	298	1626	5335	8032
460.218	272	1728	5576	8449
460.482	279	1727	5784	8593
460.745	312	1880	5984	9127
461.009	343	1893	6221	9369
461.272	369	1932	6451	9782
461.536	355	2079	6727	10141
461.799	362	2160	6941	10454
462.063	381	2216	7306	10760
462.326	395	2316	7506	11160
462.59	406	2303	7673	11603
462.853	401	2452	8033	11863
463.117	407	2506	8124	12214
463.38	425	2501	8425	12516
463.644	414	2664	8513	12939
463.907	445	2637	8686	13150
464.171	443	2846	9003	13531
464.434	458	2817	9090	13787
464.698	466	2784	9269	14245
464.961	448	2861	9507	14323
465.225	475	2941	9597	14703
465.488	485	2895	9607	14852
465.752	485	2858	10011	15093
466.015	492	2920	9869	15128
466.279	464	3020	9933	15451
466.542	501	3011	10205	15402
466.806	506	3042	10249	15705
467.069	461	2992	10128	15653
467.332	466	3067	10207	15764
467.596	491	3057	10131	15867
467.859	489	3061	10136	15803
468.123	484	2999	10256	15842
468.386	477	2929	10130	15913
468.65	447	2901	10079	15477
468.913	446	2930	9909	15637
469.177	457	2839	9908	15590
469.44	429	2887	9764	15426
469.704	428	2805	9739	15374
469.967	398	2718	9519	15203
470.231	414	2788	9354	14872
470.494	440	2734	9245	14753
470.758	412	2679	9184	14549
471.021	413	2583	8985	14170
471.284	364	2507	8836	14081
471.548	383	2488	8545	13666
471.811	376	2474	8381	13489
472.075	368	2335	8274	13111
472.338	343	2269	8063	12760
472.602	305	2270	7772	12563
472.865	317	2148	7560	12229
473.129	313	2103	7260	11746
473.392	296	1974	7102	11430
473.656	302	1930	6969	11078
473.919	267	1836	6637	10637
474.182	272	1853	6430	10392
474.446	256	1735	6147	10084
474.709	246	1643	5903	9545
474.973	223	1574	5692	9171
475.236	252	1567	5435	8866
475.5	206	1478	5326	8510
475.763	210	1421	4967	8151
476.026	181	1316	4733	7800
476.29	171	1299	4599	7398
476.553	178	1228	4276	7195
476.817	180	1132	4181	6932
477.08	156	1127	3969	6599
477.344	144	1042	3845	6299
477.607	141	1047	3556	5803
477.87	121	989	3396	5689
478.134	131	930	3319	5392
478.397	122	893	3081	5153
478.661	122	856	2978	4870
478.924	110	806	2890	4760
479.188	103	765	2714	4598
479.451	108	718	2666	4372
479.714	103	695	2478	4233
479.978	97	684	2360	3948
480.241	91	639	2316	3770
480.505	104	632	2169	3641
480.768	79	635	2132	3524
481.031	81	534	2038	3451
481.295	75	574	1953	3170
481.558	72	531	1920	3097
481.822	79	508	1865	3075
482.085	80	484	1764	2844
482.349	70	440	1663	2777
482.612	57	447	1643	2642
482.875	50	439	1587	2565
483.139	65	424	1472	2521
483.402	54	410	1418	2374
483.665	66	383	1400	2332
483.929	46	372	1341	2225
484.192	62	367	1263	2180
484.456	57	355	1236	2099
484.719	51	326	1184	2025
484.982	45	337	1183	1957
485.246	44	335	1169	1878
485.509	46	314	1133	1832
485.773	40	311	1033	1824
486.036	52	298	981	1733
486.299	50	289	1000	1760
486.563	41	259	997	1578
486.826	45	267	948	1629
487.089	42	267	933	1551
487.353	34	250	906	1534
487.616	40	254	897	1465
487.88	46	267	887	1427
488.143	32	249	867	1377
488.406	38	236	797	1335
488.67	43	227	827	1360
488.933	27	208	755	1323
489.196	28	223	774	1263
489.46	28	222	719	1226
489.723	30	179	729	1198
489.987	29	210	732	1175
490.25	37	198	716	1158
490.513	29	196	662	1144
490.777	35	168	649	1108
491.04	36	208	678	1081
491.303	31	182	612	1092
491.567	43	184	616	1022
491.83	26	196	586	1010
492.093	41	153	617	961
492.357	33	147	581	968
492.62	21	167	556	953
492.883	30	161	558	943
493.147	28	180	542	934
493.41	32	147	552	914
493.673	23	168	505	900
493.937	29	134	490	887
494.2	25	138	523	857
494.463	28	141	487	868
494.727	31	151	467	857
494.99	22	131	497	796
495.253	22	136	443	804
495.517	33	150	491	755
495.78	28	164	483	773
496.043	30	131	469	784
496.307	23	144	460	777
496.57	21	128	448	763
496.833	28	142	447	738
497.097	26	133	411	731
497.36	31	123	432	719
497.623	25	123	405	757
497.887	41	122	403	711
498.15	26	124	388	675
498.413	24	125	393	675
498.677	28	133	395	644
498.94	29	130	387	664
499.203	21	123	377	678
499.467	17	125	369	637
499.73	14	117	377	687
499.993	27	101	370	600
500.256	25	115	375	638
500.52	17	125	338	616
500.783	27	122	392	603
501.046	18	128	371	604
501.31	21	119	341	593
501.573	31	112	350	574
501.836	28	108	363	598
502.1	22	113	346	577
502.363	14	117	331	575
502.626	18	97	345	564
502.889	29	124	332	565
503.153	18	102	327	576
503.416	12	101	315	535
503.679	22	113	321	545
503.943	30	99	326	538
504.206	22	115	319	536
504.469	25	97	326	546
504.732	19	105	328	567
504.996	16	114	329	511
505.259	22	95	307	522
505.522	20	100	312	517
505.786	27	99	298	536
506.049	22	103	290	530
506.312	21	92	308	503
506.575	23	93	312	481
506.839	20	99	311	486
507.102	29	97	288	503
507.365	17	101	310	484
507.628	22	112	289	493
507.892	21	109	272	449
508.155	30	103	289	487
508.418	28	115	307	494
508.681	27	100	282	479
508.945	28	81	304	484
509.208	30	98	279	471
509.471	38	109	307	468
509.734	26	96	267	477
509.998	21	91	270	446
510.261	32	108	294	436
510.524	15	97	260	450
510.787	22	99	265	464
511.051	39	92	275	463
511.314	28	100	267	461
511.577	19	95	265	466
511.84	20	109	276	455
512.104	29	83	255	442
512.367	32	101	262	460
512.63	17	100	260	430
512.893	27	82	261	431
513.157	34	96	251	433
513.42	27	103	255	447
513.683	27	86	254	419
513.946	33	102	271	442
514.209	20	98	255	403
514.473	18	104	235	407
514.736	20	100	273	428
514.999	15	98	260	431
515.262	35	97	262	431
515.526	28	100	234	438
515.789	28	115	251	415
516.052	32	99	240	413
516.315	22	96	249	434
516.578	17	81	249	413
516.842	30	107	237	442
517.105	12	107	246	420
517.368	29	106	234	433
517.631	27	103	254	453
517.894	19	110	268	423
518.158	22	115	231	435
518.421	24	111	253	418
518.684	33	100	231	425
518.947	16	99	244	404
519.21	28	90	251	403
519.474	17	94	258	385
519.737	28	107	237	397
520	32	104	252	411
520.263	37	92	242	395
520.526	32	90	240	401
520.79	24	89	240	418
521.053	20	99	225	372
521.316	25	95	224	399
521.579	33	82	241	377
521.842	25	92	230	418
522.105	27	100	230	375
522.369	23	94	218	413
522.632	23	104	234	385
522.895	16	110	251	380
523.158	27	110	227	389
523.421	35	96	235	386
523.685	28	104	241	385
523.948	29	94	232	394
524.211	36	92	228	423
524.474	26	111	232	402
524.737	27	94	224	381
525	27	99	239	372
525.263	21	105	230	365
525.527	15	92	232	377
525.79	30	104	234	372
526.053	32	107	227	394
526.316	25	92	229	357
526.579	21	120	231	409
526.842	30	99	254	374
527.106	19	85	211	399
527.369	30	94	225	398
527.632	33	98	231	381
527.895	18	100	209	391
528.158	28	114	216	375
528.421	29	107	232	399
528.684	32	102	245	377
528.948	27	118	227	373
529.211	40	96	222	410
529.474	42	82	224	391
529.737	31	109	212	370
530	24	102	248	364
530.263	24	100	227	392
530.526	29	113	240	365
530.789	38	102	228	376
531.053	27	99	222	367
531.316	31	107	245	392
531.579	38	91	220	385
531.842	21	96	222	360
532.105	30	94	233	393
532.368	37	121	208	374
532.631	27	108	212	372
532.894	39	110	239	377
533.158	26	95	219	386
533.421	35	96	221	375
533.684	33	92	247	402
533.947	35	115	244	367
534.21	20	110	210	373
534.473	25	114	224	397
534.736	34	112	228	356
534.999	41	110	246	397
535.262	37	101	228	393
535.525	28	100	255	363
535.789	26	116	235	350
536.052	19	93	237	369
536.315	37	98	239	352
536.578	28	103	212	365
536.841	34	110	223	367
537.104	34	90	239	375
537.367	29	118	221	366
537.63	36	123	205	380
537.893	37	106	227	412
538.156	36	100	237	368
538.419	36	122	241	373
538.682	31	114	216	380
538.946	33	96	218	384
539.209	42	114	226	365
539.472	32	103	241	360
539.735	29	110	229	389
539.998	31	99	234	377
540.261	32	118	214	393
540.524	37	100	217	387
540.787	28	101	239	395
541.05	35	95	207	380
541.313	35	108	240	381
541.576	37	109	247	369
541.839	34	96	226	359
542.102	37	110	213	359
542.365	32	108	241	383
542.628	26	103	235	369
542.891	37	97	259	373
543.155	47	113	223	360
543.418	28	98	230	385
543.681	35	94	245	368
543.944	24	94	216	361
544.207	32	95	249	395
544.47	35	97	227	367
544.733	48	77	231	381
544.996	36	108	248	398
545.259	18	120	250	389
545.522	40	103	237	389
545.785	57	111	241	400
546.048	41	108	231	389
546.311	35	98	246	385
546.574	55	98	233	356
546.837	29	107	242	399
547.1	45	96	207	349
547.363	26	114	255	342
547.626	29	105	238	352
547.889	44	107	245	370
548.152	27	113	242	365
548.415	42	94	246	402
548.678	29	126	236	357
548.941	41	84	210	394
549.204	46	112	244	370
549.467	35	103	258	377
549.73	31	97	247	364
549.993	38	99	220	372
550.256	41	100	233	371
550.519	26	109	223	409
550.782	31	109	220	382
551.045	21	108	232	374
551.308	39	106	235	401
551.571	42	109	242	403
551.834	37	96	235	373
552.097	40	106	233	389
552.36	38	110	231	390
552.623	39	105	237	388
552.886	40	111	246	380
553.149	37	89	220	374
553.412	29	91	225	360
553.675	49	110	254	365
553.938	40	114	232	389
554.201	39	117	244	376
554.464	46	88	203	379
554.727	36	109	238	377
554.99	33	105	232	372
555.253	40	98	234	353
555.516	37	93	236	378
555.779	42	91	222	385
556.042	28	106	225	383
556.305	33	109	237	376
556.568	48	103	230	366
556.831	37	94	234	363
557.094	39	93	223	373
557.357	29	107	229	365
557.62	52	95	220	357
557.883	45	100	246	377
558.145	35	121	238	385
558.408	36	99	223	382
558.671	39	111	224	392
558.934	30	100	231	396
559.197	33	117	247	376
559.46	40	105	231	385
559.723	62	110	219	394
559.986	27	92	227	364
560.249	51	110	227	372
560.512	37	104	242	373
560.775	32	112	213	378
561.038	51	105	228	388
561.301	35	96	237	359
561.564	36	122	242	370
561.827	48	98	213	375
562.09	42	98	245	374
562.352	29	110	213	373
562.615	37	92	224	382
562.878	37	106	234	380
563.141	41	116	246	392
563.404	38	103	209	353
563.667	43	91	226	377
563.93	27	96	215	360
564.193	33	99	208	373
564.456	21	93	228	380
564.719	44	104	209	376
564.982	44	108	222	355
565.245	33	97	227	350
565.507	42	104	231	363
565.77	45	90	209	383
566.033	39	87	237	376
566.296	29	117	229	384
566.559	33	85	227	377
566.822	27	93	216	382
567.085	29	108	223	383
567.348	44	114	224	383
567.611	39	87	222	376
567.873	36	87	211	370
568.136	28	105	243	381
568.399	45	104	225	357
568.662	34	92	229	382
568.925	32	100	211	367
569.188	37	99	219	370
569.451	50	105	221	361
569.714	28	91	217	335
569.976	39	90	230	378
570.239	40	107	215	377
570.502	30	118	206	373
570.765	36	99	216	377
571.028	35	94	234	377
571.291	27	97	207	354
571.554	38	100	231	391
571.817	26	107	219	350
572.079	35	99	200	383
572.342	24	114	220	399
572.605	47	87	220	376
572.868	33	93	219	365
573.131	29	92	221	367
573.394	33	91	220	361
573.656	35	90	223	373
573.919	39	102	219	384
574.182	35	88	226	378
574.445	40	86	223	374
574.708	23	103	205	346
574.971	41	100	239	367
575.234	39	108	215	349
575.496	36	86	230	350
575.759	34	114	232	361
576.022	30	100	220	350
576.285	37	93	227	352
576.548	37	102	203	374
576.81	34	92	217	382
577.073	38	95	216	392
577.336	26	100	239	370
577.599	42	95	211	376
577.862	30	75	210	361
578.125	41	96	232	367
578.387	40	86	217	368
578.65	36	98	229	380
578.913	47	95	212	372
579.176	37	82	212	370
579.439	41	87	195	369
579.701	35	77	220	374
579.964	34	105	223	366
580.227	33	98	228	369
580.49	38	97	222	345
580.753	39	99	233	381
581.015	27	94	223	356
581.278	34	99	212	353
581.541	33	82	214	368
581.804	33	95	210	369
582.067	25	90	224	349
582.329	30	86	228	366
582.592	35	94	211	377
582.855	30	86	206	342
583.118	30	84	195	371
583.38	40	82	212	340
583.643	35	101	205	376
583.906	27	86	226	400
584.169	30	75	191	351
584.432	35	85	231	373
584.694	27	91	213	353
584.957	23	106	205	339
585.22	31	90	215	378
585.483	32	93	207	362
585.745	31	85	188	374
586.008	26	99	203	342
586.271	32	79	198	349
586.534	32	81	206	366
586.796	30	100	204	363
587.059	40	80	209	370
587.322	35	86	195	365
587.585	24	77	208	370
587.847	34	80	200	368
588.11	29	83	196	341
588.373	29	85	221	349
588.636	27	78	216	358
588.898	38	81	220	334
589.161	29	79	220	372
589.424	36	81	224	372
589.687	19	94	206	360
589.949	27	77	196	353
590.212	30	83	182	355
590.475	19	104	176	339
590.738	24	90	205	373
591	33	80	209	362
591.263	25	83	191	333
591.526	24	86	189	370
591.788	33	88	199	332
592.051	32	80	227	347
592.314	29	90	199	380
592.577	31	84	220	351
592.839	23	81	211	349
593.102	12	92	187	334
593.365	35	84	195	368
593.627	33	82	187	374
593.89	22	86	203	357
594.153	24	87	182	353
594.415	30	70	197	374
594.678	20	97	201	339
594.941	24	94	207	367
595.204	29	69	212	330
595.466	25	79	185	363
595.729	27	76	198	378
595.992	36	77	212	364
596.254	16	71	185	343
596.517	33	65	186	335
596.78	33	77	199	352
597.042	30	81	190	362
597.305	25	76	178	331
597.568	27	82	208	337
597.83	20	80	224	361
598.093	18	56	215	336
598.356	31	58	185	360
598.618	17	71	203	358
598.881	34	80	193	334
599.144	28	71	202	335
599.406	27	72	187	367
599.669	21	65	187	330
599.932	33	81	196	368
600.194	17	90	186	358
600.457	30	80	197	341
600.72	29	68	193	373
600.982	31	73	193	353
601.245	19	62	190	345
601.508	15	81	198	346
601.77	29	81	200	344
602.033	20	68	202	355
602.295	21	81	192	348
602.558	25	91	179	363
602.821	25	69	195	363
603.083	25	70	175	320
603.346	22	77	161	329
603.609	24	78	205	351
603.871	29	76	182	352
604.134	25	65	181	356
604.397	26	86	214	332
604.659	19	65	197	342
604.922	23	62	202	344
605.184	23	76	206	328
605.447	30	84	194	362
605.71	8	73	174	352
605.972	26	82	190	354
606.235	26	66	174	348
606.497	24	68	179	335
606.76	28	75	162	335
607.023	4	73	188	356
607.285	21	75	178	355
607.548	31	72	181	333
607.81	21	66	188	347
608.073	11	71	176	341
608.336	17	81	183	336
608.598	17	68	186	347
608.861	11	73	174	335
609.123	22	61	190	346
609.386	15	71	180	348
609.649	25	85	176	324
609.911	20	78	177	341
610.174	20	68	176	333
610.436	37	60	186	321
610.699	24	62	166	351
610.962	20	62	175	373
611.224	15	68	172	357
611.487	28	75	159	343
611.749	28	70	200	349
612.012	25	58	188	333
612.274	15	61	174	352
612.537	20	56	199	352
612.799	20	61	175	325
613.062	14	73	179	334
613.325	28	67	164	328
613.587	18	79	203	341
613.85	15	75	179	341
614.112	27	73	182	347
614.375	22	64	156	356
614.637	35	80	169	359
614.9	23	74	187	349
615.162	23	61	174	334
615.425	11	72	175	323
615.688	17	76	167	353
615.95	17	58	168	319
616.213	32	74	180	319
616.475	14	75	177	328
616.738	17	63	166	334
617	21	71	186	328
617.263	24	83	184	336
617.525	12	48	160	334
617.788	20	55	167	338
618.05	21	67	175	323
618.313	16	85	161	328
618.575	26	76	174	328
618.838	10	63	172	327
619.1	18	62	181	339
619.363	12	70	170	304
619.625	30	51	182	340
619.888	18	62	154	330
620.15	14	61	163	330
620.413	16	60	165	381
620.675	14	67	150	349
620.938	11	64	167	322
621.2	18	68	163	317
621.463	19	75	188	342
621.725	15	64	170	339
621.988	22	76	176	336
622.25	15	64	170	324
622.513	19	69	181	327
622.775	14	67	189	310
623.038	25	51	181	321
623.3	15	64	154	317
623.563	21	51	169	315
623.825	23	66	177	316
624.088	13	79	150	336
624.35	11	55	171	303
624.613	17	72	173	342
624.875	6	51	162	321
625.138	15	51	164	318
625.4	13	62	176	306
625.662	11	73	194	328
625.925	22	63	173	305
626.187	12	61	175	325
626.45	16	58	159	327
626.712	13	73	171	313
626.975	29	64	186	329
627.237	17	75	163	307
627.5	18	63	172	329
627.762	29	61	169	322
628.024	18	59	176	309
628.287	20	55	173	339
628.549	14	56	187	328
628.812	9	62	165	328
629.074	10	58	178	325
629.337	11	65	198	309
629.599	13	59	159	315
629.862	14	55	164	303
630.124	3	61	147	332
630.386	12	63	167	276
630.649	20	54	179	328
630.911	12	59	144	306
631.174	11	65	166	310
631.436	21	54	161	321
631.698	20	60	169	336
631.961	11	58	182	325
632.223	15	67	172	308
632.486	18	58	153	326
632.748	20	51	166	301
633.01	17	59	150	319
633.273	18	61	171	323
633.535	15	57	172	321
633.798	10	58	169	296
634.06	18	51	160	337
634.322	11	57	148	306
634.585	13	61	158	290
634.847	12	73	152	322
635.11	17	52	154	330
635.372	16	47	161	325
635.634	11	67	169	299
635.897	16	57	165	313
636.159	8	42	158	342
636.422	19	50	174	347
636.684	18	53	160	318
636.946	3	56	149	282
637.209	7	52	161	301
637.471	6	57	167	315
637.733	19	57	161	300
637.996	10	57	164	309
638.258	17	51	165	307
638.52	12	60	154	301
638.783	15	60	162	305
639.045	16	48	150	310
639.308	10	63	153	305
639.57	6	60	146	326
639.832	7	60	164	308
640.095	15	67	169	306
640.357	13	57	154	297
640.619	4	53	173	280
640.882	18	63	158	285
641.144	24	49	147	312
641.406	8	62	145	295
641.669	15	55	161	316
641.931	12	50	147	308
642.193	16	61	142	277
642.456	16	36	149	301
642.718	21	46	132	297
642.98	10	57	143	331
643.242	19	47	133	311
643.505	18	65	159	295
643.767	12	53	140	300
644.029	13	50	162	307
644.292	9	58	151	303
644.554	14	56	148	307
644.816	13	51	143	300
645.079	14	52	152	292
645.341	9	57	139	291
645.603	28	51	155	295
645.866	13	50	142	293
646.128	8	43	151	307
646.39	13	45	171	312
646.652	13	46	149	290
646.915	1	65	162	302
647.177	2	53	139	289
647.439	8	53	152	274
647.702	14	53	151	269
647.964	12	58	156	322
648.226	-1	43	158	290
648.488	18	50	160	304
648.751	6	54	151	292
649.013	12	57	151	311
649.275	13	41	136	337
649.537	9	42	159	304
649.8	5	53	152	317
650.062	12	55	140	286
650.324	13	44	126	265
650.587	11	54	158	280
650.849	10	52	132	297
651.111	16	53	146	295
651.373	14	48	144	288
651.636	1	49	135	291
651.898	17	60	129	290
652.16	5	47	134	281
652.422	5	64	138	286
652.685	16	55	136	274
652.947	7	40	130	283
653.209	14	52	154	290
653.471	13	46	155	292
653.733	13	56	131	298
653.996	14	50	147	314
654.258	7	52	152	284
654.52	14	50	126	277
654.782	4	54	140	275
655.045	15	53	144	299
655.307	12	48	139	297
655.569	14	35	134	280
655.831	7	41	144	297
656.093	13	46	129	290
656.356	15	44	139	300
656.618	10	42	121	290
656.88	23	38	120	293
657.142	-2	40	145	272
657.404	11	48	126	281
657.667	13	52	124	266
657.929	15	51	146	274
658.191	2	50	136	280
658.453	9	41	133	272
658.715	21	42	147	262
658.978	9	45	141	268
659.24	15	42	146	269
659.502	16	38	125	274
659.764	20	38	124	265
660.026	9	59	137	279
660.289	21	32	141	302
660.551	14	52	126	310
660.813	6	46	121	270
661.075	3	45	126	250
661.337	8	45	148	272
661.599	14	47	134	284
661.862	9	40	150	279
662.124	12	47	131	268
662.386	21	48	132	265
662.648	10	50	147	259
662.91	7	49	142	276
663.172	14	31	141	293
663.434	2	50	112	286
663.697	7	37	151	267
663.959	6	43	123	269
664.221	12	51	126	287
664.483	9	60	131	260
664.745	1	51	128	280
665.007	7	47	142	267
665.269	15	46	114	265
665.532	16	45	126	272
665.794	7	37	132	277
666.056	9	46	121	255
666.318	15	47	111	267
666.58	4	43	125	256
666.842	6	40	127	242
667.104	14	48	124	254
667.366	4	41	108	266
667.629	16	37	128	290
667.891	7	38	120	264
668.153	11	57	147	261
668.415	11	39	132	260
668.677	9	34	125	278
668.939	6	44	123	268
669.201	18	51	138	269
669.463	6	52	155	289
669.725	5	34	135	269
669.987	2	32	123	254
670.25	11	47	114	248
670.512	15	36	119	265
670.774	13	40	139	261
671.036	17	44	121	252
671.298	22	38	123	274
671.56	8	32	126	242
671.822	17	41	114	257
672.084	9	40	140	254
672.346	-1	39	126	261
672.608	13	38	142	248
672.87	11	43	123	259
673.132	15	37	121	275
673.394	13	43	133	263
673.656	14	57	120	259
673.919	13	46	144	258
674.181	18	45	135	271
674.443	6	48	126	238
674.705	5	49	136	236
674.967	16	36	135	278
675.229	11	44	118	262
675.491	18	38	128	252
675.753	6	33	117	246
676.015	17	47	122	248
676.277	3	33	130	250
676.539	8	43	129	241
676.801	3	37	121	260
677.063	14	44	126	253
677.325	4	44	116	259
677.587	-2	41	118	239
677.849	11	38	114	225
678.111	7	28	114	249
678.373	9	26	119	251
678.635	10	38	123	282
678.897	8	35	108	229
679.159	3	39	125	251
679.421	6	40	119	239
679.683	9	32	109	244
679.945	0	29	130	227
680.207	12	42	110	247
680.469	11	42	115	228
680.731	12	37	124	257
680.993	9	39	120	240
681.255	11	46	126	240
681.517	16	40	125	251
681.779	9	43	115	244
682.041	3	35	123	238
682.303	10	38	110	213
682.565	11	39	111	245
682.827	15	37	106	234
683.089	10	37	124	233
683.351	7	26	116	259
683.613	6	42	103	243
683.875	14	43	115	262
684.137	0	33	109	227
684.399	6	34	126	246
684.661	9	35	104	231
684.923	10	33	111	240
685.185	4	44	107	233
685.447	0	19	101	223
685.709	18	30	115	228
685.971	7	34	105	226
686.233	11	29	100	239
686.495	13	36	121	231
686.756	8	43	109	226
687.018	9	32	100	254
687.28	11	32	116	211
687.542	14	32	120	200
687.804	3	35	135	221
688.066	10	39	124	213
688.328	10	37	109	218
688.59	7	40	104	225
688.852	8	38	112	237
689.114	5	37	108	231
689.376	7	36	106	220
689.638	15	42	123	236
689.9	3	16	112	231
690.162	3	27	98	218
690.423	3	38	107	245
690.685	7	44	101	228
690.947	13	33	126	223
691.209	11	35	108	243
691.471	7	29	103	237
691.733	5	42	112	213
691.995	8	37	118	225
692.257	9	32	93	220
692.519	2	37	108	219
692.78	7	13	96	226
693.042	13	33	109	227
693.304	9	44	108	221
693.566	10	34	96	227
693.828	14	38	102	227
694.09	6	41	109	226
694.352	2	34	95	225
694.614	12	39	114	208
694.876	4	35	99	208
695.137	4	34	97	221
695.399	12	44	107	206
695.661	10	40	119	227
695.923	4	27	96	215

## Sheet: Foglio2
Figure 6b
x-axis	y-axis (left)
	3 (V)	3.5 (V)	6 (V)	10 (V)
Wavelength (nm)	Luminescence (arb.u.)
343.641	1	0	20	4
343.905	-2	8	10	19
344.169	-9	-4	-3	1
344.433	-4	6	10	2
344.697	6	3	4	15
344.961	-10	-1	-3	11
345.224	2	-1	8	17
345.488	11	15	10	15
345.752	-5	5	4	10
346.016	5	8	7	16
346.28	1	-3	12	3
346.544	7	12	1	14
346.808	3	8	4	19
347.072	6	0	16	15
347.336	4	3	11	16
347.6	1	-4	0	-6
347.864	-5	2	6	12
348.128	-1	11	11	8
348.392	1	7	12	15
348.656	-7	9	7	14
348.92	4	1	12	15
349.184	1	5	16	17
349.447	1	1	10	5
349.711	-1	6	9	10
349.975	10	1	8	11
350.239	-5	-4	11	15
350.503	5	9	14	14
350.767	-1	5	17	8
351.031	-1	2	17	22
351.295	-10	7	11	5
351.559	-6	-2	-1	8
351.823	8	-4	11	12
352.087	-2	9	10	11
352.351	-7	1	2	11
352.615	-1	3	9	10
352.878	5	9	9	12
353.142	2	10	5	13
353.406	1	6	8	15
353.67	-1	9	9	11
353.934	-2	0	11	8
354.198	0	12	13	14
354.462	-1	-8	5	18
354.726	-4	7	8	12
354.99	-1	9	12	9
355.254	4	10	9	5
355.518	-1	1	7	15
355.782	-4	10	18	12
356.045	-4	2	12	16
356.309	11	1	9	19
356.573	3	1	15	11
356.837	4	9	4	1
357.101	-3	11	1	14
357.365	2	9	19	18
357.629	8	9	12	20
357.893	9	0	8	6
358.157	-13	4	16	8
358.421	6	-3	8	20
358.685	3	5	6	9
358.948	-2	3	5	15
359.212	-2	-5	-1	11
359.476	3	12	15	11
359.74	6	2	9	15
360.004	-1	3	5	15
360.268	2	1	25	26
360.532	-1	9	9	17
360.796	6	11	9	14
361.06	5	4	15	18
361.324	-3	6	19	14
361.587	-9	18	19	12
361.851	7	4	12	26
362.115	2	5	16	24
362.379	1	6	2	13
362.643	0	15	14	26
362.907	-3	5	8	16
363.171	-8	3	19	32
363.435	-6	7	20	27
363.699	2	3	7	39
363.962	3	-2	30	31
364.226	-6	6	16	27
364.49	-9	6	8	35
364.754	0	4	13	35
365.018	-1	6	13	18
365.282	-5	9	19	26
365.546	-2	7	19	30
365.81	2	9	21	37
366.074	-6	10	16	32
366.337	-6	13	26	21
366.601	1	14	18	32
366.865	9	10	32	28
367.129	-1	-4	19	45
367.393	-1	1	16	37
367.657	-2	10	23	47
367.921	-4	4	26	52
368.185	4	5	23	43
368.448	-1	6	22	36
368.712	5	2	19	45
368.976	2	7	28	51
369.24	-1	5	31	59
369.504	-2	9	28	64
369.768	0	10	30	45
370.032	-3	10	20	46
370.296	-1	15	32	48
370.559	2	7	29	36
370.823	-2	12	37	70
371.087	-3	16	22	60
371.351	12	9	26	62
371.615	-7	13	34	49
371.879	-1	9	25	73
372.143	-7	7	28	69
372.407	-3	12	36	53
372.67	1	11	31	66
372.934	-7	2	32	70
373.198	4	10	38	76
373.462	2	18	35	83
373.726	-1	14	33	71
373.99	-2	5	41	83
374.254	-4	10	47	80
374.517	-4	19	39	75
374.781	1	4	29	76
375.045	8	20	35	93
375.309	-5	17	44	79
375.573	0	3	40	99
375.837	0	15	52	97
376.101	11	20	53	82
376.364	6	13	44	94
376.628	-1	15	54	102
376.892	-4	13	43	100
377.156	0	16	69	100
377.42	4	21	48	100
377.684	3	15	55	104
377.947	-8	18	52	125
378.211	3	16	63	106
378.475	-1	17	62	94
378.739	2	20	52	109
379.003	8	26	59	109
379.267	0	22	68	122
379.53	10	16	68	136
379.794	7	9	79	125
380.058	12	32	64	130
380.322	-2	23	54	127
380.586	3	2	65	121
380.85	5	14	66	125
381.114	-3	20	67	141
381.377	-4	19	58	133
381.641	-3	23	59	132
381.905	-4	15	75	123
382.169	-5	17	69	150
382.433	2	22	69	150
382.697	4	21	67	165
382.96	-2	17	75	160
383.224	4	25	65	143
383.488	0	23	75	153
383.752	3	18	85	142
384.016	6	21	85	189
384.279	3	25	79	170
384.543	8	26	89	173
384.807	7	27	102	180
385.071	-1	28	89	172
385.335	8	27	90	158
385.599	-3	31	92	170
385.862	11	29	83	177
386.126	7	23	80	166
386.39	4	25	89	179
386.654	-5	27	101	182
386.918	0	33	95	173
387.181	6	19	105	172
387.445	1	19	98	179
387.709	-10	20	81	179
387.973	8	25	102	189
388.237	4	22	86	195
388.501	9	30	97	202
388.764	8	34	101	193
389.028	10	23	111	191
389.292	-2	18	108	197
389.556	0	11	102	191
389.82	6	24	96	218
390.083	3	24	121	211
390.347	-3	20	113	219
390.611	9	26	107	222
390.875	2	21	91	226
391.139	-4	26	123	204
391.402	12	31	108	203
391.666	2	28	93	227
391.93	6	38	109	205
392.194	11	33	110	234
392.458	2	27	115	243
392.721	7	24	113	219
392.985	3	32	117	221
393.249	1	27	115	211
393.513	5	28	117	214
393.776	3	26	118	242
394.04	4	32	132	225
394.304	-6	30	121	239
394.568	4	30	120	224
394.832	-1	27	125	227
395.095	14	32	119	249
395.359	3	38	142	241
395.623	5	21	125	240
395.887	16	41	148	246
396.151	-4	29	127	235
396.414	4	40	116	257
396.678	5	29	131	267
396.942	4	38	139	242
397.206	12	28	130	269
397.469	-6	29	127	265
397.733	4	22	130	261
397.997	-1	33	116	251
398.261	2	44	134	286
398.525	0	42	137	261
398.788	4	32	148	265
399.052	-10	38	142	296
399.316	7	24	143	302
399.58	3	28	138	279
399.843	2	43	138	283
400.107	6	37	129	267
400.371	12	25	140	288
400.635	3	37	139	273
400.898	1	32	121	286
401.162	7	39	155	266
401.426	2	25	153	262
401.69	4	34	152	304
401.954	4	35	127	287
402.217	10	40	152	277
402.481	4	40	150	312
402.745	-1	32	135	284
403.009	12	26	135	302
403.272	8	46	161	287
403.536	3	41	168	307
403.8	11	29	155	289
404.064	12	47	163	302
404.327	0	48	158	300
404.591	5	33	149	295
404.855	-2	35	157	290
405.119	-2	38	155	274
405.382	6	36	151	330
405.646	2	37	165	299
405.91	8	26	132	322
406.174	8	49	150	324
406.437	-1	59	140	333
406.701	19	42	167	322
406.965	6	36	162	349
407.229	3	24	152	316
407.492	12	40	157	337
407.756	10	47	153	324
408.02	-8	40	149	300
408.283	-7	33	170	346
408.547	8	40	154	345
408.811	6	42	160	311
409.075	6	44	154	329
409.338	-1	39	160	339
409.602	8	41	146	329
409.866	2	39	153	328
410.13	5	51	169	331
410.393	18	49	155	324
410.657	0	37	183	318
410.921	3	48	155	327
411.185	3	34	174	349
411.448	5	53	159	329
411.712	5	44	164	351
411.976	5	40	160	355
412.239	-3	33	181	362
412.503	6	42	165	352
412.767	-5	35	185	342
413.031	13	46	177	363
413.294	9	30	182	358
413.558	14	39	179	353
413.822	11	36	177	344
414.085	4	54	165	378
414.349	15	50	174	369
414.613	0	50	178	355
414.877	2	49	168	389
415.14	8	45	196	341
415.404	6	32	167	354
415.668	14	44	182	355
415.931	10	47	160	362
416.195	7	45	190	382
416.459	4	40	174	349
416.723	8	50	198	368
416.986	1	41	184	386
417.25	11	34	189	390
417.514	2	39	178	346
417.777	11	46	201	399
418.041	12	43	201	353
418.305	6	59	196	405
418.568	13	46	185	379
418.832	6	46	189	404
419.096	13	42	177	368
419.359	12	50	168	378
419.623	4	53	174	376
419.887	2	47	199	405
420.151	-3	49	171	366
420.414	7	51	209	390
420.678	10	39	190	395
420.942	11	48	183	396
421.205	10	48	181	386
421.469	6	47	208	396
421.733	-4	48	182	404
421.996	11	57	193	410
422.26	11	56	196	391
422.524	1	42	182	379
422.787	16	43	204	437
423.051	19	60	188	404
423.315	6	46	182	428
423.578	10	47	208	378
423.842	10	44	195	433
424.106	9	54	199	405
424.369	0	54	193	393
424.633	6	58	183	411
424.897	-4	47	216	411
425.16	-3	48	188	405
425.424	12	49	206	442
425.688	12	49	208	417
425.951	8	45	188	404
426.215	13	63	210	411
426.479	5	40	201	404
426.742	4	61	170	413
427.006	17	48	197	404
427.27	14	50	189	419
427.533	10	44	201	423
427.797	-2	42	185	426
428.061	7	57	204	394
428.324	12	45	189	408
428.588	13	50	203	456
428.852	8	54	199	429
429.115	5	50	216	411
429.379	14	54	200	433
429.643	18	56	194	438
429.906	6	38	201	415
430.17	12	59	202	432
430.434	11	53	216	411
430.697	4	50	196	426
430.961	0	46	220	410
431.225	14	57	228	411
431.488	8	39	186	424
431.752	-2	44	203	411
432.015	14	42	209	425
432.279	10	62	203	436
432.543	0	51	218	428
432.806	10	55	196	453
433.07	11	52	199	419
433.334	7	52	221	400
433.597	13	59	190	419
433.861	6	47	222	416
434.125	8	59	211	417
434.388	9	51	237	433
434.652	12	50	208	437
434.915	6	53	196	458
435.179	8	54	220	402
435.443	7	54	212	451
435.706	10	58	220	446
435.97	12	60	211	437
436.234	6	57	224	451
436.497	11	51	210	446
436.761	12	68	214	414
437.024	9	64	228	468
437.288	21	61	223	432
437.552	5	55	216	461
437.815	0	57	224	454
438.079	1	64	234	438
438.342	14	51	241	463
438.606	8	59	217	423
438.87	12	66	232	453
439.133	5	57	216	422
439.397	15	40	223	432
439.661	6	72	242	458
439.924	18	62	211	487
440.188	9	57	235	459
440.451	11	68	249	452
440.715	4	80	253	463
440.979	6	63	253	456
441.242	9	70	262	470
441.506	15	68	253	472
441.769	10	63	253	465
442.033	11	79	248	489
442.297	13	73	254	540
442.56	4	61	258	486
442.824	8	75	249	512
443.087	4	66	247	522
443.351	10	79	272	505
443.615	4	86	275	555
443.878	11	74	276	530
444.142	2	77	310	534
444.405	15	93	304	550
444.669	11	73	299	583
444.932	13	75	315	582
445.196	15	78	306	620
445.46	7	84	324	635
445.723	10	81	362	582
445.987	15	93	336	632
446.25	23	97	358	637
446.514	12	110	373	710
446.777	16	83	370	714
447.041	14	113	403	684
447.305	8	116	416	739
447.568	16	118	418	755
447.832	29	124	445	784
448.095	13	125	483	785
448.359	32	122	471	836
448.622	26	132	487	849
448.886	18	151	500	902
449.15	22	154	555	931
449.413	22	163	588	964
449.677	26	189	604	1029
449.94	31	182	673	1115
450.204	31	202	658	1138
450.467	38	199	708	1194
450.731	42	196	676	1232
450.995	28	231	754	1297
451.258	49	242	827	1329
451.522	47	247	839	1424
451.785	48	292	926	1508
452.049	49	290	1011	1561
452.312	53	313	1011	1657
452.576	62	353	1136	1752
452.839	57	360	1188	1823
453.103	55	376	1267	1959
453.366	70	395	1302	2004
453.63	74	388	1370	2203
453.894	66	463	1507	2357
454.157	84	449	1575	2433
454.421	69	506	1597	2621
454.684	101	540	1818	2808
454.948	91	606	1871	2931
455.211	104	605	2015	3121
455.475	124	659	2220	3334
455.738	125	709	2340	3500
456.002	124	732	2488	3813
456.265	140	809	2689	3973
456.529	143	844	2785	4228
456.792	168	883	2978	4520
457.056	157	986	3184	4729
457.319	160	965	3307	5016
457.583	180	1040	3463	5258
457.847	202	1162	3700	5553
458.11	209	1178	3829	5819
458.374	221	1255	4127	6180
458.637	244	1346	4204	6538
458.901	230	1417	4458	6727
459.164	243	1460	4658	7177
459.428	243	1480	4968	7397
459.691	291	1586	5030	7750
459.955	298	1626	5335	8032
460.218	272	1728	5576	8449
460.482	279	1727	5784	8593
460.745	312	1880	5984	9127
461.009	343	1893	6221	9369
461.272	369	1932	6451	9782
461.536	355	2079	6727	10141
461.799	362	2160	6941	10454
462.063	381	2216	7306	10760
462.326	395	2316	7506	11160
462.59	406	2303	7673	11603
462.853	401	2452	8033	11863
463.117	407	2506	8124	12214
463.38	425	2501	8425	12516
463.644	414	2664	8513	12939
463.907	445	2637	8686	13150
464.171	443	2846	9003	13531
464.434	458	2817	9090	13787
464.698	466	2784	9269	14245
464.961	448	2861	9507	14323
465.225	475	2941	9597	14703
465.488	485	2895	9607	14852
465.752	485	2858	10011	15093
466.015	492	2920	9869	15128
466.279	464	3020	9933	15451
466.542	501	3011	10205	15402
466.806	506	3042	10249	15705
467.069	461	2992	10128	15653
467.332	466	3067	10207	15764
467.596	491	3057	10131	15867
467.859	489	3061	10136	15803
468.123	484	2999	10256	15842
468.386	477	2929	10130	15913
468.65	447	2901	10079	15477
468.913	446	2930	9909	15637
469.177	457	2839	9908	15590
469.44	429	2887	9764	15426
469.704	428	2805	9739	15374
469.967	398	2718	9519	15203
470.231	414	2788	9354	14872
470.494	440	2734	9245	14753
470.758	412	2679	9184	14549
471.021	413	2583	8985	14170
471.284	364	2507	8836	14081
471.548	383	2488	8545	13666
471.811	376	2474	8381	13489
472.075	368	2335	8274	13111
472.338	343	2269	8063	12760
472.602	305	2270	7772	12563
472.865	317	2148	7560	12229
473.129	313	2103	7260	11746
473.392	296	1974	7102	11430
473.656	302	1930	6969	11078
473.919	267	1836	6637	10637
474.182	272	1853	6430	10392
474.446	256	1735	6147	10084
474.709	246	1643	5903	9545
474.973	223	1574	5692	9171
475.236	252	1567	5435	8866
475.5	206	1478	5326	8510
475.763	210	1421	4967	8151
476.026	181	1316	4733	7800
476.29	171	1299	4599	7398
476.553	178	1228	4276	7195
476.817	180	1132	4181	6932
477.08	156	1127	3969	6599
477.344	144	1042	3845	6299
477.607	141	1047	3556	5803
477.87	121	989	3396	5689
478.134	131	930	3319	5392
478.397	122	893	3081	5153
478.661	122	856	2978	4870
478.924	110	806	2890	4760
479.188	103	765	2714	4598
479.451	108	718	2666	4372
479.714	103	695	2478	4233
479.978	97	684	2360	3948
480.241	91	639	2316	3770
480.505	104	632	2169	3641
480.768	79	635	2132	3524
481.031	81	534	2038	3451
481.295	75	574	1953	3170
481.558	72	531	1920	3097
481.822	79	508	1865	3075
482.085	80	484	1764	2844
482.349	70	440	1663	2777
482.612	57	447	1643	2642
482.875	50	439	1587	2565
483.139	65	424	1472	2521
483.402	54	410	1418	2374
483.665	66	383	1400	2332
483.929	46	372	1341	2225
484.192	62	367	1263	2180
484.456	57	355	1236	2099
484.719	51	326	1184	2025
484.982	45	337	1183	1957
485.246	44	335	1169	1878
485.509	46	314	1133	1832
485.773	40	311	1033	1824
486.036	52	298	981	1733
486.299	50	289	1000	1760
486.563	41	259	997	1578
486.826	45	267	948	1629
487.089	42	267	933	1551
487.353	34	250	906	1534
487.616	40	254	897	1465
487.88	46	267	887	1427
488.143	32	249	867	1377
488.406	38	236	797	1335
488.67	43	227	827	1360
488.933	27	208	755	1323
489.196	28	223	774	1263
489.46	28	222	719	1226
489.723	30	179	729	1198
489.987	29	210	732	1175
490.25	37	198	716	1158
490.513	29	196	662	1144
490.777	35	168	649	1108
491.04	36	208	678	1081
491.303	31	182	612	1092
491.567	43	184	616	1022
491.83	26	196	586	1010
492.093	41	153	617	961
492.357	33	147	581	968
492.62	21	167	556	953
492.883	30	161	558	943
493.147	28	180	542	934
493.41	32	147	552	914
493.673	23	168	505	900
493.937	29	134	490	887
494.2	25	138	523	857
494.463	28	141	487	868
494.727	31	151	467	857
494.99	22	131	497	796
495.253	22	136	443	804
495.517	33	150	491	755
495.78	28	164	483	773
496.043	30	131	469	784
496.307	23	144	460	777
496.57	21	128	448	763
496.833	28	142	447	738
497.097	26	133	411	731
497.36	31	123	432	719
497.623	25	123	405	757
497.887	41	122	403	711
498.15	26	124	388	675
498.413	24	125	393	675
498.677	28	133	395	644
498.94	29	130	387	664
499.203	21	123	377	678
499.467	17	125	369	637
499.73	14	117	377	687
499.993	27	101	370	600
500.256	25	115	375	638
500.52	17	125	338	616
500.783	27	122	392	603
501.046	18	128	371	604
501.31	21	119	341	593
501.573	31	112	350	574
501.836	28	108	363	598
502.1	22	113	346	577
502.363	14	117	331	575
502.626	18	97	345	564
502.889	29	124	332	565
503.153	18	102	327	576
503.416	12	101	315	535
503.679	22	113	321	545
503.943	30	99	326	538
504.206	22	115	319	536
504.469	25	97	326	546
504.732	19	105	328	567
504.996	16	114	329	511
505.259	22	95	307	522
505.522	20	100	312	517
505.786	27	99	298	536
506.049	22	103	290	530
506.312	21	92	308	503
506.575	23	93	312	481
506.839	20	99	311	486
507.102	29	97	288	503
507.365	17	101	310	484
507.628	22	112	289	493
507.892	21	109	272	449
508.155	30	103	289	487
508.418	28	115	307	494
508.681	27	100	282	479
508.945	28	81	304	484
509.208	30	98	279	471
509.471	38	109	307	468
509.734	26	96	267	477
509.998	21	91	270	446
510.261	32	108	294	436
510.524	15	97	260	450
510.787	22	99	265	464
511.051	39	92	275	463
511.314	28	100	267	461
511.577	19	95	265	466
511.84	20	109	276	455
512.104	29	83	255	442
512.367	32	101	262	460
512.63	17	100	260	430
512.893	27	82	261	431
513.157	34	96	251	433
513.42	27	103	255	447
513.683	27	86	254	419
513.946	33	102	271	442
514.209	20	98	255	403
514.473	18	104	235	407
514.736	20	100	273	428
514.999	15	98	260	431
515.262	35	97	262	431
515.526	28	100	234	438
515.789	28	115	251	415
516.052	32	99	240	413
516.315	22	96	249	434
516.578	17	81	249	413
516.842	30	107	237	442
517.105	12	107	246	420
517.368	29	106	234	433
517.631	27	103	254	453
517.894	19	110	268	423
518.158	22	115	231	435
518.421	24	111	253	418
518.684	33	100	231	425
518.947	16	99	244	404
519.21	28	90	251	403
519.474	17	94	258	385
519.737	28	107	237	397
520	32	104	252	411
520.263	37	92	242	395
520.526	32	90	240	401
520.79	24	89	240	418
521.053	20	99	225	372
521.316	25	95	224	399
521.579	33	82	241	377
521.842	25	92	230	418
522.105	27	100	230	375
522.369	23	94	218	413
522.632	23	104	234	385
522.895	16	110	251	380
523.158	27	110	227	389
523.421	35	96	235	386
523.685	28	104	241	385
523.948	29	94	232	394
524.211	36	92	228	423
524.474	26	111	232	402
524.737	27	94	224	381
525	27	99	239	372
525.263	21	105	230	365
525.527	15	92	232	377
525.79	30	104	234	372
526.053	32	107	227	394
526.316	25	92	229	357
526.579	21	120	231	409
526.842	30	99	254	374
527.106	19	85	211	399
527.369	30	94	225	398
527.632	33	98	231	381
527.895	18	100	209	391
528.158	28	114	216	375
528.421	29	107	232	399
528.684	32	102	245	377
528.948	27	118	227	373
529.211	40	96	222	410
529.474	42	82	224	391
529.737	31	109	212	370
530	24	102	248	364
530.263	24	100	227	392
530.526	29	113	240	365
530.789	38	102	228	376
531.053	27	99	222	367
531.316	31	107	245	392
531.579	38	91	220	385
531.842	21	96	222	360
532.105	30	94	233	393
532.368	37	121	208	374
532.631	27	108	212	372
532.894	39	110	239	377
533.158	26	95	219	386
533.421	35	96	221	375
533.684	33	92	247	402
533.947	35	115	244	367
534.21	20	110	210	373
534.473	25	114	224	397
534.736	34	112	228	356
534.999	41	110	246	397
535.262	37	101	228	393
535.525	28	100	255	363
535.789	26	116	235	350
536.052	19	93	237	369
536.315	37	98	239	352
536.578	28	103	212	365
536.841	34	110	223	367
537.104	34	90	239	375
537.367	29	118	221	366
537.63	36	123	205	380
537.893	37	106	227	412
538.156	36	100	237	368
538.419	36	122	241	373
538.682	31	114	216	380
538.946	33	96	218	384
539.209	42	114	226	365
539.472	32	103	241	360
539.735	29	110	229	389
539.998	31	99	234	377
540.261	32	118	214	393
540.524	37	100	217	387
540.787	28	101	239	395
541.05	35	95	207	380
541.313	35	108	240	381
541.576	37	109	247	369
541.839	34	96	226	359
542.102	37	110	213	359
542.365	32	108	241	383
542.628	26	103	235	369
542.891	37	97	259	373
543.155	47	113	223	360
543.418	28	98	230	385
543.681	35	94	245	368
543.944	24	94	216	361
544.207	32	95	249	395
544.47	35	97	227	367
544.733	48	77	231	381
544.996	36	108	248	398
545.259	18	120	250	389
545.522	40	103	237	389
545.785	57	111	241	400
546.048	41	108	231	389
546.311	35	98	246	385
546.574	55	98	233	356
546.837	29	107	242	399
547.1	45	96	207	349
547.363	26	114	255	342
547.626	29	105	238	352
547.889	44	107	245	370
548.152	27	113	242	365
548.415	42	94	246	402
548.678	29	126	236	357
548.941	41	84	210	394
549.204	46	112	244	370
549.467	35	103	258	377
549.73	31	97	247	364
549.993	38	99	220	372
550.256	41	100	233	371
550.519	26	109	223	409
550.782	31	109	220	382
551.045	21	108	232	374
551.308	39	106	235	401
551.571	42	109	242	403
551.834	37	96	235	373
552.097	40	106	233	389
552.36	38	110	231	390
552.623	39	105	237	388
552.886	40	111	246	380
553.149	37	89	220	374
553.412	29	91	225	360
553.675	49	110	254	365
553.938	40	114	232	389
554.201	39	117	244	376
554.464	46	88	203	379
554.727	36	109	238	377
554.99	33	105	232	372
555.253	40	98	234	353
555.516	37	93	236	378
555.779	42	91	222	385
556.042	28	106	225	383
556.305	33	109	237	376
556.568	48	103	230	366
556.831	37	94	234	363
557.094	39	93	223	373
557.357	29	107	229	365
557.62	52	95	220	357
557.883	45	100	246	377
558.145	35	121	238	385
558.408	36	99	223	382
558.671	39	111	224	392
558.934	30	100	231	396
559.197	33	117	247	376
559.46	40	105	231	385
559.723	62	110	219	394
559.986	27	92	227	364
560.249	51	110	227	372
560.512	37	104	242	373
560.775	32	112	213	378
561.038	51	105	228	388
561.301	35	96	237	359
561.564	36	122	242	370
561.827	48	98	213	375
562.09	42	98	245	374
562.352	29	110	213	373
562.615	37	92	224	382
562.878	37	106	234	380
563.141	41	116	246	392
563.404	38	103	209	353
563.667	43	91	226	377
563.93	27	96	215	360
564.193	33	99	208	373
564.456	21	93	228	380
564.719	44	104	209	376
564.982	44	108	222	355
565.245	33	97	227	350
565.507	42	104	231	363
565.77	45	90	209	383
566.033	39	87	237	376
566.296	29	117	229	384
566.559	33	85	227	377
566.822	27	93	216	382
567.085	29	108	223	383
567.348	44	114	224	383
567.611	39	87	222	376
567.873	36	87	211	370
568.136	28	105	243	381
568.399	45	104	225	357
568.662	34	92	229	382
568.925	32	100	211	367
569.188	37	99	219	370
569.451	50	105	221	361
569.714	28	91	217	335
569.976	39	90	230	378
570.239	40	107	215	377
570.502	30	118	206	373
570.765	36	99	216	377
571.028	35	94	234	377
571.291	27	97	207	354
571.554	38	100	231	391
571.817	26	107	219	350
572.079	35	99	200	383
572.342	24	114	220	399
572.605	47	87	220	376
572.868	33	93	219	365
573.131	29	92	221	367
573.394	33	91	220	361
573.656	35	90	223	373
573.919	39	102	219	384
574.182	35	88	226	378
574.445	40	86	223	374
574.708	23	103	205	346
574.971	41	100	239	367
575.234	39	108	215	349
575.496	36	86	230	350
575.759	34	114	232	361
576.022	30	100	220	350
576.285	37	93	227	352
576.548	37	102	203	374
576.81	34	92	217	382
577.073	38	95	216	392
577.336	26	100	239	370
577.599	42	95	211	376
577.862	30	75	210	361
578.125	41	96	232	367
578.387	40	86	217	368
578.65	36	98	229	380
578.913	47	95	212	372
579.176	37	82	212	370
579.439	41	87	195	369
579.701	35	77	220	374
579.964	34	105	223	366
580.227	33	98	228	369
580.49	38	97	222	345
580.753	39	99	233	381
581.015	27	94	223	356
581.278	34	99	212	353
581.541	33	82	214	368
581.804	33	95	210	369
582.067	25	90	224	349
582.329	30	86	228	366
582.592	35	94	211	377
582.855	30	86	206	342
583.118	30	84	195	371
583.38	40	82	212	340
583.643	35	101	205	376
583.906	27	86	226	400
584.169	30	75	191	351
584.432	35	85	231	373
584.694	27	91	213	353
584.957	23	106	205	339
585.22	31	90	215	378
585.483	32	93	207	362
585.745	31	85	188	374
586.008	26	99	203	342
586.271	32	79	198	349
586.534	32	81	206	366
586.796	30	100	204	363
587.059	40	80	209	370
587.322	35	86	195	365
587.585	24	77	208	370
587.847	34	80	200	368
588.11	29	83	196	341
588.373	29	85	221	349
588.636	27	78	216	358
588.898	38	81	220	334
589.161	29	79	220	372
589.424	36	81	224	372
589.687	19	94	206	360
589.949	27	77	196	353
590.212	30	83	182	355
590.475	19	104	176	339
590.738	24	90	205	373
591	33	80	209	362
591.263	25	83	191	333
591.526	24	86	189	370
591.788	33	88	199	332
592.051	32	80	227	347
592.314	29	90	199	380
592.577	31	84	220	351
592.839	23	81	211	349
593.102	12	92	187	334
593.365	35	84	195	368
593.627	33	82	187	374
593.89	22	86	203	357
594.153	24	87	182	353
594.415	30	70	197	374
594.678	20	97	201	339
594.941	24	94	207	367
595.204	29	69	212	330
595.466	25	79	185	363
595.729	27	76	198	378
595.992	36	77	212	364
596.254	16	71	185	343
596.517	33	65	186	335
596.78	33	77	199	352
597.042	30	81	190	362
597.305	25	76	178	331
597.568	27	82	208	337
597.83	20	80	224	361
598.093	18	56	215	336
598.356	31	58	185	360
598.618	17	71	203	358
598.881	34	80	193	334
599.144	28	71	202	335
599.406	27	72	187	367
599.669	21	65	187	330
599.932	33	81	196	368
600.194	17	90	186	358
600.457	30	80	197	341
600.72	29	68	193	373
600.982	31	73	193	353
601.245	19	62	190	345
601.508	15	81	198	346
601.77	29	81	200	344
602.033	20	68	202	355
602.295	21	81	192	348
602.558	25	91	179	363
602.821	25	69	195	363
603.083	25	70	175	320
603.346	22	77	161	329
603.609	24	78	205	351
603.871	29	76	182	352
604.134	25	65	181	356
604.397	26	86	214	332
604.659	19	65	197	342
604.922	23	62	202	344
605.184	23	76	206	328
605.447	30	84	194	362
605.71	8	73	174	352
605.972	26	82	190	354
606.235	26	66	174	348
606.497	24	68	179	335
606.76	28	75	162	335
607.023	4	73	188	356
607.285	21	75	178	355
607.548	31	72	181	333
607.81	21	66	188	347
608.073	11	71	176	341
608.336	17	81	183	336
608.598	17	68	186	347
608.861	11	73	174	335
609.123	22	61	190	346
609.386	15	71	180	348
609.649	25	85	176	324
609.911	20	78	177	341
610.174	20	68	176	333
610.436	37	60	186	321
610.699	24	62	166	351
610.962	20	62	175	373
611.224	15	68	172	357
611.487	28	75	159	343
611.749	28	70	200	349
612.012	25	58	188	333
612.274	15	61	174	352
612.537	20	56	199	352
612.799	20	61	175	325
613.062	14	73	179	334
613.325	28	67	164	328
613.587	18	79	203	341
613.85	15	75	179	341
614.112	27	73	182	347
614.375	22	64	156	356
614.637	35	80	169	359
614.9	23	74	187	349
615.162	23	61	174	334
615.425	11	72	175	323
615.688	17	76	167	353
615.95	17	58	168	319
616.213	32	74	180	319
616.475	14	75	177	328
616.738	17	63	166	334
617	21	71	186	328
617.263	24	83	184	336
617.525	12	48	160	334
617.788	20	55	167	338
618.05	21	67	175	323
618.313	16	85	161	328
618.575	26	76	174	328
618.838	10	63	172	327
619.1	18	62	181	339
619.363	12	70	170	304
619.625	30	51	182	340
619.888	18	62	154	330
620.15	14	61	163	330
620.413	16	60	165	381
620.675	14	67	150	349
620.938	11	64	167	322
621.2	18	68	163	317
621.463	19	75	188	342
621.725	15	64	170	339
621.988	22	76	176	336
622.25	15	64	170	324
622.513	19	69	181	327
622.775	14	67	189	310
623.038	25	51	181	321
623.3	15	64	154	317
623.563	21	51	169	315
623.825	23	66	177	316
624.088	13	79	150	336
624.35	11	55	171	303
624.613	17	72	173	342
624.875	6	51	162	321
625.138	15	51	164	318
625.4	13	62	176	306
625.662	11	73	194	328
625.925	22	63	173	305
626.187	12	61	175	325
626.45	16	58	159	327
626.712	13	73	171	313
626.975	29	64	186	329
627.237	17	75	163	307
627.5	18	63	172	329
627.762	29	61	169	322
628.024	18	59	176	309
628.287	20	55	173	339
628.549	14	56	187	328
628.812	9	62	165	328
629.074	10	58	178	325
629.337	11	65	198	309
629.599	13	59	159	315
629.862	14	55	164	303
630.124	3	61	147	332
630.386	12	63	167	276
630.649	20	54	179	328
630.911	12	59	144	306
631.174	11	65	166	310
631.436	21	54	161	321
631.698	20	60	169	336
631.961	11	58	182	325
632.223	15	67	172	308
632.486	18	58	153	326
632.748	20	51	166	301
633.01	17	59	150	319
633.273	18	61	171	323
633.535	15	57	172	321
633.798	10	58	169	296
634.06	18	51	160	337
634.322	11	57	148	306
634.585	13	61	158	290
634.847	12	73	152	322
635.11	17	52	154	330
635.372	16	47	161	325
635.634	11	67	169	299
635.897	16	57	165	313
636.159	8	42	158	342
636.422	19	50	174	347
636.684	18	53	160	318
636.946	3	56	149	282
637.209	7	52	161	301
637.471	6	57	167	315
637.733	19	57	161	300
637.996	10	57	164	309
638.258	17	51	165	307
638.52	12	60	154	301
638.783	15	60	162	305
639.045	16	48	150	310
639.308	10	63	153	305
639.57	6	60	146	326
639.832	7	60	164	308
640.095	15	67	169	306
640.357	13	57	154	297
640.619	4	53	173	280
640.882	18	63	158	285
641.144	24	49	147	312
641.406	8	62	145	295
641.669	15	55	161	316
641.931	12	50	147	308
642.193	16	61	142	277
642.456	16	36	149	301
642.718	21	46	132	297
642.98	10	57	143	331
643.242	19	47	133	311
643.505	18	65	159	295
643.767	12	53	140	300
644.029	13	50	162	307
644.292	9	58	151	303
644.554	14	56	148	307
644.816	13	51	143	300
645.079	14	52	152	292
645.341	9	57	139	291
645.603	28	51	155	295
645.866	13	50	142	293
646.128	8	43	151	307
646.39	13	45	171	312
646.652	13	46	149	290
646.915	1	65	162	302
647.177	2	53	139	289
647.439	8	53	152	274
647.702	14	53	151	269
647.964	12	58	156	322
648.226	-1	43	158	290
648.488	18	50	160	304
648.751	6	54	151	292
649.013	12	57	151	311
649.275	13	41	136	337
649.537	9	42	159	304
649.8	5	53	152	317
650.062	12	55	140	286
650.324	13	44	126	265
650.587	11	54	158	280
650.849	10	52	132	297
651.111	16	53	146	295
651.373	14	48	144	288
651.636	1	49	135	291
651.898	17	60	129	290
652.16	5	47	134	281
652.422	5	64	138	286
652.685	16	55	136	274
652.947	7	40	130	283
653.209	14	52	154	290
653.471	13	46	155	292
653.733	13	56	131	298
653.996	14	50	147	314
654.258	7	52	152	284
654.52	14	50	126	277
654.782	4	54	140	275
655.045	15	53	144	299
655.307	12	48	139	297
655.569	14	35	134	280
655.831	7	41	144	297
656.093	13	46	129	290
656.356	15	44	139	300
656.618	10	42	121	290
656.88	23	38	120	293
657.142	-2	40	145	272
657.404	11	48	126	281
657.667	13	52	124	266
657.929	15	51	146	274
658.191	2	50	136	280
658.453	9	41	133	272
658.715	21	42	147	262
658.978	9	45	141	268
659.24	15	42	146	269
659.502	16	38	125	274
659.764	20	38	124	265
660.026	9	59	137	279
660.289	21	32	141	302
660.551	14	52	126	310
660.813	6	46	121	270
661.075	3	45	126	250
661.337	8	45	148	272
661.599	14	47	134	284
661.862	9	40	150	279
662.124	12	47	131	268
662.386	21	48	132	265
662.648	10	50	147	259
662.91	7	49	142	276
663.172	14	31	141	293
663.434	2	50	112	286
663.697	7	37	151	267
663.959	6	43	123	269
664.221	12	51	126	287
664.483	9	60	131	260
664.745	1	51	128	280
665.007	7	47	142	267
665.269	15	46	114	265
665.532	16	45	126	272
665.794	7	37	132	277
666.056	9	46	121	255
666.318	15	47	111	267
666.58	4	43	125	256
666.842	6	40	127	242
667.104	14	48	124	254
667.366	4	41	108	266
667.629	16	37	128	290
667.891	7	38	120	264
668.153	11	57	147	261
668.415	11	39	132	260
668.677	9	34	125	278
668.939	6	44	123	268
669.201	18	51	138	269
669.463	6	52	155	289
669.725	5	34	135	269
669.987	2	32	123	254
670.25	11	47	114	248
670.512	15	36	119	265
670.774	13	40	139	261
671.036	17	44	121	252
671.298	22	38	123	274
671.56	8	32	126	242
671.822	17	41	114	257
672.084	9	40	140	254
672.346	-1	39	126	261
672.608	13	38	142	248
672.87	11	43	123	259
673.132	15	37	121	275
673.394	13	43	133	263
673.656	14	57	120	259
673.919	13	46	144	258
674.181	18	45	135	271
674.443	6	48	126	238
674.705	5	49	136	236
674.967	16	36	135	278
675.229	11	44	118	262
675.491	18	38	128	252
675.753	6	33	117	246
676.015	17	47	122	248
676.277	3	33	130	250
676.539	8	43	129	241
676.801	3	37	121	260
677.063	14	44	126	253
677.325	4	44	116	259
677.587	-2	41	118	239
677.849	11	38	114	225
678.111	7	28	114	249
678.373	9	26	119	251
678.635	10	38	123	282
678.897	8	35	108	229
679.159	3	39	125	251
679.421	6	40	119	239
679.683	9	32	109	244
679.945	0	29	130	227
680.207	12	42	110	247
680.469	11	42	115	228
680.731	12	37	124	257
680.993	9	39	120	240
681.255	11	46	126	240
681.517	16	40	125	251
681.779	9	43	115	244
682.041	3	35	123	238
682.303	10	38	110	213
682.565	11	39	111	245
682.827	15	37	106	234
683.089	10	37	124	233
683.351	7	26	116	259
683.613	6	42	103	243
683.875	14	43	115	262
684.137	0	33	109	227
684.399	6	34	126	246
684.661	9	35	104	231
684.923	10	33	111	240
685.185	4	44	107	233
685.447	0	19	101	223
685.709	18	30	115	228
685.971	7	34	105	226
686.233	11	29	100	239
686.495	13	36	121	231
686.756	8	43	109	226
687.018	9	32	100	254
687.28	11	32	116	211
687.542	14	32	120	200
687.804	3	35	135	221
688.066	10	39	124	213
688.328	10	37	109	218
688.59	7	40	104	225
688.852	8	38	112	237
689.114	5	37	108	231
689.376	7	36	106	220
689.638	15	42	123	236
689.9	3	16	112	231
690.162	3	27	98	218
690.423	3	38	107	245
690.685	7	44	101	228
690.947	13	33	126	223
691.209	11	35	108	243
691.471	7	29	103	237
691.733	5	42	112	213
691.995	8	37	118	225
692.257	9	32	93	220
692.519	2	37	108	219
692.78	7	13	96	226
693.042	13	33	109	227
693.304	9	44	108	221
693.566	10	34	96	227
693.828	14	38	102	227
694.09	6	41	109	226
694.352	2	34	95	225
694.614	12	39	114	208
694.876	4	35	99	208
695.137	4	34	97	221
695.399	12	44	107	206
695.661	10	40	119	227
695.923	4	27	96	215
