# Supplementary material for: Blue CdSe/CdS core/crown nanoplatelet light-emitting diodes obtained via a design-of-experiments approach
Source: Royal Society of Chemistry journal article supplement (doi:10.1039/d4nr03461a), 2024-11-13
Supplement: d4nr03461a1.zip [file Figure 1a 1b.xlsx]

## Sheet: Foglio1
Figure 1a					Figure 1b
x-axis	y-axis (left)	x-axis	y-axis (right)		x-axis	y-axis (left)	x-axis	y-axis (right)
Wavelength (nm)nm	Absorbance (arb.u.)	Wavelength (nm)nm	PL (arb.u.)		Wavelength (nm)nm	Absorbance (arb.u.)	Wavelength (nm)nm	PL (arb.u.)
600	0.00983	400.876	0.00522		600	6.66078e-05	400.282	0.00779
599	0.00974	401.47	0.00667		599	0.000228575	400.876	0.00754
598	0.00967	402.064	0.00383		598	0.000423606	401.47	0.00747
597	0.01027	402.658	0.00561		597	0.000276973	402.064	0.00712
596	0.01031	403.252	0.00502		596	0.000306683	402.658	0.00781
595	0.01044	403.846	0.00494		595	0.000435586	403.252	0.00787
594	0.01079	404.44	0.00443		594	0.000608574	403.846	0.00729
593	0.01071	405.034	0.00472		593	0.000726456	404.44	0.0073
592	0.01089	405.628	0.00414		592	0.000392459	405.034	0.00749
591	0.01119	406.222	0.00397		591	0.000179697	405.628	0.00748
590	0.0115	406.816	0.00401		590	0.000187364	406.222	0.00767
589	0.01177	407.409	0.00453		589	0.000239117	406.816	0.00734
588	0.012	408.003	0.00353		588	0.000103506	407.409	0.00741
587	0.01211	408.597	0.00336		587	0.000100151	408.003	0.00749
586	0.01234	409.19	0.00288		586	0.000262118	408.597	0.00741
585	0.01257	409.784	0.00414		585	0.000170593	409.19	0.00754
584	0.01273	410.377	0.003		584	1.29382e-05	409.784	0.00742
583	0.0128	410.971	0.00433		583	0.00013082	410.377	0.00682
582	0.01303	411.565	0.00332		582	6.13366e-05	410.971	0.00741
581	0.01303	412.158	0.00303		581	0.000245347	411.565	0.0071
580	0.01335	412.751	0.0043		580	0.000374249	412.158	0.00761
579	0.01374	413.345	0.00373		579	0.000403959	412.751	0.0074
578	0.01339	413.938	0.00321		578	0.000400605	413.345	0.00717
577	0.01371	414.532	0.00334		577	0.000441336	413.938	0.00757
576	0.01396	415.125	0.00369		576	6.32534e-05	414.532	0.00751
575	0.01407	415.718	0.00452		575	0.000170113	415.125	0.00749
574	0.01422	416.311	0.00274		574	0.000431273	415.718	0.0073
573	0.01462	416.905	0.00452		573	0.000383833	416.311	0.00766
572	0.0145	417.498	0.00279		572	0.0005458	416.905	0.0076
571	0.01458	418.091	0.00356		571	0.000410189	417.498	0.0075
570	0.01492	418.684	0.00309		570	0.000109256	418.091	0.00722
569	0.01532	419.277	0.00339		569	0.000116923	418.684	0.00763
568	0.01545	419.87	0.00338		568	0.000565447	419.277	0.00732
567	0.01544	420.463	0.00336		567	0	419.87	0.0075
566	0.01568	421.056	0.00347		566	6.27742e-05	420.463	0.00756
565	0.01593	421.649	0.00211		565	0.00013657	421.056	0.00755
564	0.01615	422.242	0.00136		564	0.000265473	421.649	0.00735
563	0.01634	422.835	0.00347		563	0.000449483	422.242	0.00742
562	0.01655	423.428	0.00314		562	0.000446128	422.835	0.00744
561	0.01671	424.021	0.00335		561	0.000497881	423.428	0.00751
560	0.01697	424.614	0.00316		560	0.000593719	424.021	0.00762
559	0.01721	425.206	0.00316		559	0.000832837	424.614	0.00748
558	0.0173	425.799	0.00227		558	0.00115	425.206	0.00785
557	0.01777	426.392	0.00383		557	0.000837149	425.799	0.00719
556	0.01764	426.985	0.00241		556	0.000580302	426.392	0.00775
555	0.01796	427.577	0.0043		555	0.000389583	426.985	0.00777
554	0.01858	428.17	0.00319		554	0.000287036	427.577	0.00788
553	0.01898	428.762	0.00426		553	0.000349811	428.17	0.00806
552	0.01853	429.355	0.0035		552	0.000809356	428.762	0.00806
551	0.01884	429.947	0.00336		551	0.000673745	429.355	0.00785
550	0.01909	430.54	0.00396		550	0.000648347	429.947	0.00822
549	0.01917	431.132	0.00489		549	0.000644993	430.54	0.00829
548	0.0192	431.725	0.00453		548	0.000663682	431.132	0.00808
547	0.01982	432.317	0.00493		547	0.000869734	431.725	0.00836
546	0.02006	432.909	0.00373		546	0.000811273	432.317	0.00879
545	0.02057	433.502	0.00539		545	0.000852004	432.909	0.00906
544	0.02093	434.094	0.00545		544	0.00118	433.502	0.0089
543	0.02073	434.686	0.00515		543	0.00159	434.094	0.00908
542	0.02073	435.279	0.00443		542	0.00134	434.686	0.00942
541	0.02147	435.871	0.00553		541	0.0017	435.279	0.00941
540	0.02155	436.463	0.00679		540	0.00131	435.871	0.00955
539	0.02144	437.055	0.0077		539	0.00133	436.463	0.01007
538	0.02165	437.647	0.00734		538	0.00178	437.055	0.01014
537	0.02185	438.239	0.00831		537	0.00118	437.647	0.01086
536	0.02209	438.831	0.00871		536	0.00167	438.239	0.01092
535	0.02234	439.423	0.01008		535	0.00202	438.831	0.01133
534	0.02275	440.015	0.0103		534	0.00225	439.423	0.01156
533	0.02329	440.607	0.01123		533	0.00237	440.015	0.01161
532	0.02324	441.199	0.01142		532	0.00231	440.607	0.0125
531	0.02374	441.791	0.01278		531	0.00247	441.199	0.01259
530	0.02412	442.383	0.01439		530	0.0023	441.791	0.01342
529	0.02426	442.974	0.01476		529	0.00224	442.383	0.01382
528	0.02428	443.566	0.01581		528	0.00253	442.974	0.01467
527	0.02482	444.158	0.01796		527	0.00318	443.566	0.01553
526	0.02436	444.75	0.02102		526	0.00308	444.158	0.01617
525	0.0247	445.341	0.02152		525	0.0031	444.75	0.01754
524	0.02535	445.933	0.02655		524	0.00351	445.341	0.0189
523	0.02574	446.524	0.02947		523	0.00401	445.933	0.02046
522	0.02551	447.116	0.03401		522	0.00385	446.524	0.02229
521	0.02563	447.708	0.03742		521	0.00374	447.116	0.02402
520	0.02597	448.299	0.04362		520	0.0034	447.708	0.02636
519	0.02652	448.891	0.05369		519	0.00328	448.299	0.02911
518	0.02708	449.482	0.06067		518	0.00346	448.891	0.03345
517	0.02718	450.073	0.07155		517	0.00383	449.482	0.03668
516	0.02724	450.665	0.08897		516	0.00306	450.073	0.04074
515	0.0279	451.256	0.10633		515	0.00348	450.665	0.04717
514	0.02835	451.847	0.12477		514	0.00401	451.256	0.05442
513	0.02841	452.439	0.15947		513	0.00404	451.847	0.06122
512	0.02868	453.03	0.18711		512	0.00336	452.439	0.0727
511	0.02877	453.621	0.23824		511	0.00349	453.03	0.08413
510	0.029	454.212	0.28695		510	0.00364	453.621	0.10246
509	0.02897	454.803	0.3377		509	0.00365	454.212	0.12023
508	0.02885	455.394	0.42352		508	0.00352	454.803	0.13921
507	0.02937	455.986	0.50406		507	0.00336	455.394	0.17192
506	0.03019	456.577	0.59257		506	0.00318	455.986	0.21035
505	0.03064	457.168	0.70776		505	0.00373	456.577	0.24906
504	0.03082	457.759	0.79942		504	0.00424	457.168	0.31123
503	0.03097	458.349	0.88019		503	0.00448	457.759	0.37661
502	0.03137	458.94	0.94251		502	0.00448	458.349	0.44942
501	0.03162	459.531	1		501	0.0045	458.94	0.53689
500	0.03181	460.122	0.9589		500	0.00468	459.531	0.64997
499	0.03236	460.713	0.92867		499	0.00482	460.122	0.71161
498	0.03314	461.304	0.89751		498	0.00494	460.713	0.80161
497	0.03367	461.894	0.82187		497	0.0052	461.304	0.91113
496	0.03405	462.485	0.7211		496	0.00582	461.894	0.96981
495	0.03436	463.076	0.62045		495	0.00563	462.485	1
494	0.03476	463.666	0.53327		494	0.00616	463.076	0.99104
493	0.0352	464.257	0.46417		493	0.0064	463.666	0.97978
492	0.03553	464.848	0.37672		492	0.00555	464.257	0.95157
491	0.0363	465.438	0.32938		491	0.00592	464.848	0.84836
490	0.03708	466.029	0.27249		490	0.00662	465.438	0.78342
489	0.03758	466.619	0.229		489	0.007	466.029	0.68295
488	0.0379	467.209	0.19848		488	0.00717	466.619	0.57829
487	0.03837	467.8	0.16688		487	0.00739	467.209	0.50743
486	0.03934	468.39	0.14384		486	0.00784	467.8	0.4301
485	0.04016	468.981	0.12169		485	0.00752	468.39	0.36119
484	0.04054	469.571	0.1056		484	0.00781	468.981	0.30866
483	0.04109	470.161	0.09156		483	0.00827	469.571	0.26434
482	0.04241	470.751	0.08022		482	0.00852	470.161	0.22466
481	0.0427	471.342	0.07079		481	0.00897	470.751	0.19729
480	0.04363	471.932	0.06334		480	0.00905	471.342	0.17243
479	0.04455	472.522	0.05585		479	0.00984	471.932	0.15115
478	0.04531	473.112	0.05046		478	0.01036	472.522	0.13136
477	0.046	473.702	0.04294		477	0.01064	473.112	0.11757
476	0.04728	474.292	0.03884		476	0.01309	473.702	0.1016
475	0.0486	474.882	0.03387		475	0.01453	474.292	0.09075
474	0.0501	475.472	0.03123		474	0.0163	474.882	0.08131
473	0.05211	476.062	0.02824		473	0.01961	475.472	0.07167
472	0.05485	476.652	0.02518		472	0.02511	476.062	0.06403
471	0.05812	477.242	0.02314		471	0.03246	476.652	0.05762
470	0.06269	477.832	0.02072		470	0.04551	477.242	0.05309
469	0.06924	478.421	0.01984		469	0.06449	477.832	0.04676
468	0.07875	479.011	0.01717		468	0.09507	478.421	0.04317
467	0.09261	479.601	0.01612		467	0.14323	479.011	0.03918
466	0.11437	480.19	0.01443		466	0.21692	479.601	0.03605
465	0.15215	480.78	0.01404		465	0.33305	480.19	0.03369
464	0.21026	481.37	0.01317		464	0.48849	480.78	0.03115
463	0.29654	481.959	0.01277		463	0.66505	481.37	0.02862
462	0.41897	482.549	0.01206		462	0.83577	481.959	0.02734
461	0.58311	483.138	0.01122		461	0.95288	482.549	0.02604
460	0.75574	483.728	0.01084		460	0.98367	483.138	0.02461
459	0.89896	484.317	0.01118		459	0.95731	483.728	0.02294
458	0.98763	484.907	0.01016		458	0.88988	484.317	0.02223
457	1.00619	485.496	0.01048		457	0.80002	484.907	0.02111
456	0.95461	486.086	0.00922		456	0.71144	485.496	0.02085
455	0.87737	486.675	0.00985		455	0.63473	486.086	0.02005
454	0.79172	487.264	0.00904		454	0.56923	486.675	0.01955
453	0.70928	487.853	0.00885		453	0.51608	487.264	0.01905
452	0.63662	488.443	0.00868		452	0.47465	487.853	0.01861
451	0.57866	489.032	0.00868		451	0.4433	488.443	0.01813
450	0.53379	489.621	0.00893		450	0.42112	489.032	0.01818
449	0.50012	490.21	0.00891		449	0.40696	489.621	0.01788
448	0.47631	490.799	0.00928		448	0.39894	490.21	0.0177
447	0.46117	491.388	0.00858		447	0.39511	490.799	0.01745
446	0.45384	491.977	0.00905		446	0.39548	491.388	0.01729
445	0.45327	492.566	0.00875		445	0.40123	491.977	0.01739
444	0.45772	493.155	0.00897		444	0.4102	492.566	0.01711
443	0.46695	493.744	0.0088		443	0.42298	493.155	0.01704
442	0.48106	494.333	0.00872		442	0.44074	493.744	0.01707
441	0.50081	494.922	0.00868		441	0.46516	494.333	0.01704
440	0.52756	495.511	0.00816		440	0.4939	494.922	0.01723
439	0.56027	496.099	0.0089		439	0.53051	495.511	0.01664
438	0.59803	496.688	0.00824		438	0.57087	496.099	0.01709
437	0.63947	497.277	0.00868		437	0.61337	496.688	0.01713
436	0.6829	497.866	0.00849		436	0.65829	497.277	0.01708
435	0.72296	498.454	0.00823		435	0.69688	497.866	0.0172
434	0.7557	499.043	0.00772		434	0.72779	498.454	0.01708
433	0.77855	499.631	0.00824		433	0.7487	499.043	0.01708
432	0.7898	500.22	0.00845		432	0.75812	499.631	0.01727
431	0.78885	500.808	0.00798		431	0.75581	500.22	0.01732
430	0.77705	501.397	0.00771		430	0.74319	500.808	0.01731
429	0.75643	501.985	0.00857		429	0.72418	501.397	0.01757
428	0.73187	502.574	0.00754		428	0.70062	501.985	0.01776
427	0.70543	503.162	0.00786		427	0.67373	502.574	0.01756
426	0.67811	503.75	0.00821		426	0.64576	503.162	0.01782
425	0.653	504.339	0.00816		425	0.6215	503.75	0.01787
424	0.62839	504.927	0.00789		424	0.59697	504.339	0.01804
423	0.60614	505.515	0.00842		423	0.57449	504.927	0.01818
422	0.58622	506.103	0.00775		422	0.55388	505.515	0.01819
421	0.56794	506.692	0.00812		421	0.53446	506.103	0.01831
420	0.55047	507.28	0.00749		420	0.51538	506.692	0.01856
419	0.53673	507.868	0.00856		419	0.5013	507.28	0.01837
418	0.5242	508.456	0.00827		418	0.48912	507.868	0.01858
417	0.51262	509.044	0.00843		417	0.47797	508.456	0.0186
416	0.50195	509.632	0.00842		416	0.46782	509.044	0.01883
415	0.49242	510.22	0.00875		415	0.45904	509.632	0.01898
414	0.4846	510.808	0.00835		414	0.4515	510.22	0.01917
413	0.4775	511.396	0.00862		413	0.44479	510.808	0.01928
412	0.47224	511.984	0.00917		412	0.44008	511.396	0.01945
411	0.4684	512.571	0.00872		411	0.43643	511.984	0.01954
410	0.46368	513.159	0.00891		410	0.43238	512.571	0.0195
409	0.46093	513.747	0.00851		409	0.43404	513.159	0.01971
408	0.46003	514.335	0.00892		408	0.43297	513.747	0.01983
407	0.45849	514.922	0.00878		407	0.43265	514.335	0.01971
406	0.45686	515.51	0.00829		406	0.434	514.922	0.01997
405	0.45899	516.098	0.00915		405	0.43684	515.51	0.02008
404	0.46076	516.685	0.00898		404	0.44007	516.098	0.02039
403	0.46356	517.273	0.00947		403	0.44532	516.685	0.02054
402	0.46788	517.86	0.00869		402	0.45201	517.273	0.02065
401	0.4734	518.448	0.00924		401	0.45937	517.86	0.02074
400	0.47898	519.035	0.00863		400	0.46583	518.448	0.02094
		519.623	0.00902		399	0.46561	519.035	0.02117
		520.21	0.00905		398	0.47341	519.623	0.02111
		520.797	0.00907		397	0.48643	520.21	0.02144
		521.385	0.009		396	0.49988	520.797	0.02142
		521.972	0.00927		395	0.50944	521.385	0.02176
		522.559	0.00944		394	0.51968	521.972	0.02192
		523.146	0.0092		393	0.54351	522.559	0.02202
		523.733	0.0098		392	0.55359	523.146	0.02231
		524.321	0.00953		391	0.56314	523.733	0.0222
		524.908	0.00973		390	0.5842	524.321	0.02232
		525.495	0.00945		389	0.59752	524.908	0.02262
		526.082	0.01006		388	0.63348	525.495	0.02276
		526.669	0.0101		387	0.6817	526.082	0.02289
		527.256	0.01011		386	0.74273	526.669	0.02317
		527.843	0.01014		385	0.82061	527.256	0.02297
		528.429	0.01		384	0.94182	527.843	0.02332
		529.016	0.0108		383	1.10274	528.429	0.02356
		529.603	0.00972		382	1.26239	529.016	0.02361
		530.19	0.01072		381	1.43723	529.603	0.02368
		530.777	0.01047		380	1.61143	530.19	0.02381
		531.363	0.01045		379	1.75355	530.777	0.02375
		531.95	0.01038		378	1.87252	531.363	0.02339
		532.537	0.01041		377	1.98643	531.95	0.02355
		533.123	0.01063		376	2.0942	532.537	0.02382
		533.71	0.01076		375	2.18797	533.123	0.02389
		534.296	0.01047		374	2.26942	533.71	0.02387
		534.883	0.01068		373	2.31283	534.296	0.02389
		535.469	0.01074		372	2.3346	534.883	0.02397
		536.056	0.01109		371	2.32649	535.469	0.02369
		536.642	0.01064		370	2.28762	536.056	0.02376
		537.229	0.01111		369	2.22814	536.642	0.02383
		537.815	0.01138		368	2.15117	537.229	0.02379
		538.401	0.01155		367	2.06556	537.815	0.02363
		538.987	0.01112		366	1.97964	538.401	0.02399
		539.574	0.01166		365	1.89494	538.987	0.02324
		540.16	0.01139		364	1.8112	539.574	0.02368
		540.746	0.0122		363	1.75021	540.16	0.0233
		541.332	0.01168		362	1.68904	540.746	0.02347
		541.918	0.01223		361	1.63004	541.332	0.02318
		542.504	0.01194		360	1.58247	541.918	0.02331
		543.09	0.01198		359	1.54427	542.504	0.02286
		543.676	0.0123		358	1.50909	543.09	0.02315
		544.262	0.01157		357	1.48237	543.676	0.02282
		544.848	0.01237		356	1.46137	544.262	0.02281
		545.434	0.01277		355	1.44494	544.848	0.02259
		546.02	0.01263		354	1.43294	545.434	0.02254
		546.605	0.01261		353	1.42108	546.02	0.02234
		547.191	0.01261		352	1.4168	546.605	0.02241
		547.777	0.01285		351	1.41625	547.191	0.02226
		548.363	0.01325		350	1.4161	547.777	0.02202
		548.948	0.01326		349	1.41376	548.363	0.022
		549.534	0.01375		348	1.41407	548.948	0.02187
		550.12	0.01333		347	1.41143	549.534	0.02171
		550.705	0.01357		346	1.40999	550.12	0.02165
		551.291	0.01362		345	1.40868	550.705	0.02131
		551.876	0.01374		344	1.40423	551.291	0.02111
		552.461	0.01389		343	1.3996	551.876	0.02092
		553.047	0.01356		342	1.40066	552.461	0.02095
		553.632	0.01422		341	1.40111	553.047	0.02072
		554.218	0.01462		340	1.39879	553.632	0.02054
		554.803	0.01424		339	1.39444	554.218	0.0201
		555.388	0.01344		338	1.40109	554.803	0.02036
		555.973	0.01414		337	1.40631	555.388	0.01987
		556.559	0.01429		336	1.40894	555.973	0.01985
		557.144	0.01494		335	1.4116	556.559	0.01996
		557.729	0.01492		334	1.418	557.144	0.01967
		558.314	0.01494		333	1.42583	557.729	0.01921
		558.899	0.01434		332	1.43362	558.314	0.0194
		559.484	0.01498		331	1.44038	558.899	0.01879
		560.069	0.01459		330	1.44707	559.484	0.01898
		560.654	0.01496		329	1.45458	560.069	0.01863
		561.239	0.01536		328	1.45896	560.654	0.01855
		561.824	0.01521		327	1.46525	561.239	0.01824
		562.409	0.01554		326	1.4726	561.824	0.01807
		562.993	0.01548		325	1.47993	562.409	0.01797
		563.578	0.01531		324	1.48628	562.993	0.01744
		564.163	0.01584		323	1.49181	563.578	0.01761
		564.748	0.01535		322	1.49859	564.163	0.0176
		565.332	0.01558		321	1.50644	564.748	0.01707
		565.917	0.01558		320	1.51541	565.332	0.017
		566.501	0.01578		319	1.525	565.917	0.01698
		567.086	0.01489		318	1.53341	566.501	0.01653
		567.671	0.01528		317	1.54201	567.086	0.01661
		568.255	0.01567		316	1.55015	567.671	0.01623
		568.839	0.01509		315	1.55891	568.255	0.01615
		569.424	0.01525		314	1.56913	568.839	0.01585
		570.008	0.01524		313	1.58084	569.424	0.01578
		570.593	0.01515		312	1.59561	570.008	0.0155
		571.177	0.01562		311	1.60669	570.593	0.01542
		571.761	0.01508		310	1.61806	571.177	0.01514
		572.345	0.01435		309	1.6327	571.761	0.01483
		572.93	0.01486		308	1.65129	572.345	0.01488
		573.514	0.01481		307	1.67038	572.93	0.01476
		574.098	0.01427		306	1.68886	573.514	0.0146
		574.682	0.01461		305	1.70978	574.098	0.01416
		575.266	0.01403		304	1.73283	574.682	0.01405
		575.85	0.0143		303	1.75461	575.266	0.0136
		576.434	0.01408		302	1.78133	575.85	0.01363
		577.018	0.01384		301	1.80845	576.434	0.0135
		577.602	0.01335		300	1.83832	577.018	0.0133
		578.186	0.01314				577.602	0.01298
		578.77	0.01301				578.186	0.01299
		579.353	0.01313				578.77	0.01276
		579.937	0.01325				579.353	0.01264
		580.521	0.01295				579.937	0.01257
		581.105	0.01217				580.521	0.01212
		581.688	0.0126				581.105	0.01214
		582.272	0.01233				581.688	0.01205
		582.855	0.01199				582.272	0.01157
		583.439	0.01165				582.855	0.01159
		584.022	0.01197				583.439	0.01158
		584.606	0.01088				584.022	0.01131
		585.189	0.01123				584.606	0.01114
		585.773	0.01052				585.189	0.01108
		586.356	0.01091				585.773	0.01099
		586.939	0.01088				586.356	0.01101
		587.523	0.01053				586.939	0.01068
		588.106	0.0104				587.523	0.01054
		588.689	0.00987				588.106	0.01055
		589.272	0.01005				588.689	0.01071
		589.856	0.00995				589.272	0.01037
		590.439	0.00948				589.856	0.01028
		591.022	0.00992				590.439	0.01012
		591.605	0.00951				591.022	0.01012
		592.188	0.00951				591.605	0.00997
		592.771	0.009				592.188	0.00998
		593.354	0.00943				592.771	0.00991
		593.937	0.0092				593.354	0.00972
		594.519	0.00942				593.937	0.00974
		595.102	0.00853				594.519	0.00977
		595.685	0.00915				595.102	0.00958
		596.268	0.00898				595.685	0.00967
		596.85	0.00841				596.268	0.00972
		597.433	0.00843				596.85	0.0094
		598.016	0.00811				597.433	0.00945
		598.598	0.00832				598.016	0.00937
		599.181	0.00785				598.598	0.00935
		599.763	0.00777				599.181	0.00928
		600.346	0.00725				599.763	0.00939
		600.928	0.00769				600.346	0.00922
