# Supplementary material for: Blue CdSe/CdS core/crown nanoplatelet light-emitting diodes obtained via a design-of-experiments approach
Source: Royal Society of Chemistry journal article supplement (doi:10.1039/d4nr03461a), 2024-11-13
Supplement: d4nr03461a1.zip [file Figure 5a e 5b.xlsx]

## Sheet: Foglio1
Figure 5a					Figure 5b
x-axis	y-axis (left)	x-axis	y-axis (right)		x-axis	y-axis (left)	x-axis	y-axis (right)
Wavelength (nm)	Absorbance (arb.u.)	Wavelength (nm)	PL (arb.u.)		Wavelength (nm)	Absorbance (arb.u.)	Wavelength (nm)	PL (arb.u.)
550	0.0018	420	0.000159086		600	0.00718	420	5.33793e-05
549	0.00164	421.06	6.28457e-05		599	0.00637	421.06	0.000125151
548	0.000669112	421.96	0		598	0.00515	421.96	0
547	0.00162	423.03	0.000130489		597	0.00286	423.03	0.000309017
546	0.00177	423.93	0.000168305		596	0.0046	423.93	0.000196262
545	0	425	0.000470919		595	0.00827	425	0.000254554
544	0.000911823	426.06	0.000426311		594	0.01034	426.06	0.00024521
543	0.00209	426.96	0.000568077		593	0.00865	426.96	0.000353149
542	0.00144	428.03	0.000626744		592	0.00897	428.03	0.000450037
541	3.79203e-05	428.93	0.000993275		591	0.00927	428.93	0.000259277
540	0.000255332	430	0.00108		590	0.00529	430	0.000437573
539	0.00239	431.07	0.0016		589	0.00831	431.07	0.000880635
538	0.00236	432	0.00156		588	0.00182	432	0.00081667
537	0.00198	433.07	0.00215		587	0.000801965	433.07	0.00112
536	0.00057885	434	0.00288		586	0.00687	434	0.0016
535	0.00176	435.07	0.00348		585	0.00257	435.07	0.00172
534	0.0026	436	0.00363		584	0.0051	436	0.00208
533	0.00182	437.07	0.00482		583	0.00571	437.07	0.00261
532	0.00325	438	0.0055		582	0.00874	438	0.00284
531	0.00205	439.07	0.00695		581	0.00857	439.07	0.00334
530	0.000993683	440	0.00812		580	0.01084	440	0.0039
529	0.00194	441.06	0.00963		579	0.00931	441.06	0.00483
528	0.000933643	441.96	0.01165		578	0.0075	441.96	0.00563
527	0.00183	443.03	0.01423		577	0.00874	443.03	0.00738
526	0.00184	443.93	0.01728		576	0.00397	443.93	0.00865
525	0.00174	445	0.02218		575	0.00337	445	0.01101
524	0.00206	446.06	0.02822		574	0.00506	446.06	0.01422
523	0.00277	446.96	0.03615		573	0.00772	446.96	0.01763
522	0.00297	448.03	0.04809		572	0.00535	448.03	0.02286
521	0.00305	448.93	0.05903		571	0.00668	448.93	0.02832
520	0.00214	450	0.08129		570	0.00342	450	0.03625
519	0.00138	451.04	0.11705		569	0.00719	451.04	0.04816
518	0.00215	451.94	0.15712		568	0.00905	451.94	0.06308
517	0.0027	452.98	0.22581		567	0.00362	452.98	0.08951
516	0.00303	454.02	0.32991		566	0.00541	454.02	0.13098
515	0.00152	455.07	0.44388		565	0	455.07	0.18334
514	0.000735135	455.97	0.57881		564	0.00999	455.97	0.2429
513	0.00301	457.01	0.76106		563	0.00578	457.01	0.36114
512	0.003	458.05	0.92704		562	0.00385	458.05	0.5362
511	0.00364	458.95	1		561	0.00508	458.95	0.7062
510	0.00427	460	0.99007		560	0.00499	460	0.88912
509	0.00361	461.06	0.90126		559	0.00676	461.06	0.99532
508	0.00276	461.96	0.76646		558	0.0069	461.96	1
507	0.00411	463.03	0.57193		557	0.00801	463.03	0.8888
506	0.00475	463.93	0.44236		556	0.00536	463.93	0.72272
505	0.00551	465	0.33031		555	0.00702	465	0.55324
504	0.00465	466.06	0.24854		554	0.00395	466.06	0.40142
503	0.00548	466.96	0.19949		553	0.00379	466.96	0.31827
502	0.00549	468.03	0.1482		552	0.00273	468.03	0.23176
501	0.00569	468.93	0.11632		551	0.00408	468.93	0.17511
500	0.00438	470	0.09092		550	0.00872	470	0.13312
499	0.00473	471.06	0.07071		549	0.00596	471.06	0.10313
498	0.00483	471.96	0.05814		548	0.0039	471.96	0.08229
497	0.00449	473.03	0.0458		547	0.00633	473.03	0.06596
496	0.00651	473.93	0.03676		546	0.00423	473.93	0.05379
495	0.00644	475	0.0297		545	0.00523	475	0.04229
494	0.00556	476.06	0.02391		544	0.00504	476.06	0.03382
493	0.006	476.96	0.02046		543	0.00678	476.96	0.02776
492	0.00798	478.03	0.0175		542	0.00337	478.03	0.0233
491	0.00555	478.93	0.01448		541	0.00611	478.93	0.02007
490	0.00612	480	0.01274		540	0.00426	480	0.01645
489	0.00643	481.04	0.01026		539	0.0052	481.04	0.01348
488	0.00781	481.94	0.00957		538	0.00902	481.94	0.0117
487	0.00719	482.98	0.0081		537	0.00403	482.98	0.01015
486	0.00803	484.02	0.00743		536	0.00546	484.02	0.0087
485	0.00826	485.07	0.00715		535	0.00309	485.07	0.00795
484	0.00689	485.97	0.00644		534	0.00531	485.97	0.00703
483	0.00799	487.01	0.00648		533	0.00749	487.01	0.00603
482	0.00885	488.05	0.00607		532	0.00708	488.05	0.00526
481	0.00729	488.95	0.00605		531	0.00326	488.95	0.00481
480	0.00759	490	0.00571		530	0.0063	490	0.00438
479	0.00953	491.06	0.0061		529	0.00487	491.06	0.00409
478	0.00913	491.96	0.00627		528	0.00755	491.96	0.00366
477	0.0095	493.03	0.00629		527	0.00703	493.03	0.00346
476	0.00881	493.93	0.00637		526	0.0059	493.93	0.00365
475	0.00943	495	0.00676		525	0.00307	495	0.00348
474	0.01097	496.06	0.00683		524	0.00417	496.06	0.00326
473	0.01147	496.96	0.00724		523	0.00507	496.96	0.00314
472	0.01209	498.03	0.00723		522	0.00747	498.03	0.00305
471	0.01518	498.93	0.00724		521	0.00772	498.93	0.00334
470	0.01671	500	0.0081		520	0.00945	500	0.00316
469	0.0219	501.04	0.00854		519	0.00928	501.04	0.0031
468	0.02622	501.94	0.00903		518	0.00666	501.94	0.00336
467	0.03756	502.98	0.00946		517	0.00825	502.98	0.00328
466	0.05333	504.02	0.00996		516	0.01032	504.02	0.0034
465	0.08153	505.07	0.01094		515	0.00651	505.07	0.00333
464	0.12812	505.97	0.01009		514	0.00923	505.97	0.0032
463	0.19829	507.01	0.01048		513	0.00786	507.01	0.0034
462	0.31007	508.05	0.01057		512	0.00625	508.05	0.00317
461	0.46413	508.95	0.01083		511	0.00975	508.95	0.00303
460	0.65079	510	0.01057		510	0.00878	510	0.00314
459	0.83346	511.04	0.01066		509	0.00682	511.04	0.00282
458	0.9575	511.94	0.01092		508	0.0016	511.94	0.00275
457	1	512.98	0.01078		507	0.00829	512.98	0.00275
456	0.96301	514.02	0.01116		506	0.00863	514.02	0.00261
455	0.88271	515.07	0.01097		505	0.00818	515.07	0.0025
454	0.78323	515.97	0.01055		504	0.01005	515.97	0.00265
453	0.68919	517.01	0.01033		503	0.00685	517.01	0.00256
452	0.6106	518.05	0.01021		502	0.00734	518.05	0.0025
451	0.54646	518.95	0.0104		501	0.00629	518.95	0.00235
450	0.4989	520	0.01069		500	0.00628	520	0.00241
449	0.46674	521.04	0.01004		499	0.01318	521.04	0.00241
448	0.4409	521.94	0.01045		498	0.00552	521.94	0.00245
447	0.42574	522.98	0.00978		497	0.00625	522.98	0.00237
446	0.41673	524.02	0.00968		496	0.00876	524.02	0.00223
445	0.41643	525.07	0.00949		495	0.00541	525.07	0.00237
444	0.42066	525.97	0.00941		494	0.00722	525.97	0.00241
443	0.4294	527.01	0.00927		493	0.00699	527.01	0.00232
442	0.44161	528.05	0.009		492	0.0105	528.05	0.00217
441	0.45894	528.95	0.00932		491	0.00854	528.95	0.00231
440	0.4845	530	0.00869		490	0.00979	530	0.00222
439	0.51421	531.02	0.00908		489	0.01326	531.02	0.00234
438	0.5485	532.05	0.0085		488	0.00646	532.05	0.00218
437	0.58681	532.94	0.00829		487	0.005	532.94	0.00226
436	0.62957	533.97	0.00854		486	0.00936	533.97	0.00253
435	0.67191	535	0.00842		485	0.00961	535	0.00221
434	0.70644	536.02	0.00818		484	0.0078	536.02	0.00216
433	0.73212	537.05	0.00779		483	0.0122	537.05	0.00228
432	0.74937	537.94	0.00748		482	0.00846	537.94	0.00231
431	0.75149	538.97	0.00792		481	0.00479	538.97	0.00217
430	0.74423	540	0.00723		480	0.00944	540	0.00224
429	0.72521	541.04	0.00744		479	0.01157	541.04	0.00203
428	0.70278	541.94	0.00692		478	0.01534	541.94	0.00207
427	0.67771	542.98	0.00685		477	0.00969	542.98	0.00199
426	0.65194	544.02	0.00692		476	0.01308	544.02	0.00213
425	0.62748	545.07	0.00659		475	0.01469	545.07	0.00206
424	0.60277	545.97	0.0065		474	0.01413	545.97	0.00187
423	0.57617	547.01	0.00649		473	0.01662	547.01	0.00196
422	0.55345	548.05	0.00636		472	0.02026	548.05	0.00186
421	0.53883	548.95	0.00581		471	0.0247	548.95	0.00176
420	0.51724	550	0.00583		470	0.02967	550	0.0019
419	0.50163	551.02	0.00566		469	0.03834	551.02	0.00196
418	0.48756	552.05	0.0058		468	0.05795	552.05	0.00172
417	0.47247	552.94	0.00543		467	0.08926	552.94	0.00176
416	0.46304	553.97	0.00555		466	0.1422	553.97	0.00141
415	0.45023	555	0.00558		465	0.22413	555	0.00166
414	0.44198	556.02	0.00493		464	0.35318	556.02	0.00145
413	0.43344	557.05	0.00527		463	0.53477	557.05	0.00142
412	0.42753	557.94	0.00488		462	0.73798	557.94	0.00156
411	0.42013	558.97	0.00478		461	0.91303	558.97	0.00157
410	0.41424	560	0.00493		460	0.99617	560	0.00135
409	0.40776	561.04	0.00448		459	0.98836	561.04	0.00142
408	0.40915	561.94	0.00461		458	0.90582	561.94	0.00133
407	0.40638	562.98	0.00441		457	0.7951	562.98	0.00127
406	0.40457	564.02	0.00448		456	0.69619	564.02	0.00126
405	0.40434	565.07	0.00419		455	0.60245	565.07	0.00135
404	0.40341	565.97	0.00432		454	0.53709	565.97	0.00143
403	0.40501	567.01	0.00391		453	0.49007	567.01	0.00123
402	0.40933	568.05	0.00406		452	0.45774	568.05	0.00127
401	0.41252	568.95	0.00407		451	0.43136	568.95	0.00125
400	0.41644	570	0.00383		450	0.40762	570	0.00133
		571.02	0.00372		449	0.4001	571.02	0.00125
		572.05	0.0037		448	0.39134	572.05	0.00103
		572.94	0.00388		447	0.38484	572.94	0.00125
		573.97	0.00373		446	0.38761	573.97	0.00124
		575	0.00352		445	0.39441	575	0.00107
		576.02	0.00325		444	0.39179	576.02	0.00107
		577.05	0.00342		443	0.3923	577.05	0.00086061
		577.94	0.00344		442	0.4154	577.94	0.00103
		578.97	0.00343		441	0.42337	578.97	0.000956852
		580	0.00323		440	0.44454	580	0.000971155
		581.02	0.00308		439	0.48111	581.02	0.000933511
		582.05	0.00313		438	0.51841	582.05	0.000912009
		582.94	0.00331		437	0.5578	582.94	0.000969595
		583.97	0.00308		436	0.59785	583.97	0.000817095
		585	0.00269		435	0.64194	585	0.000989013
		586.02	0.00298		434	0.67712	586.02	0.000860462
		587.05	0.00268		433	0.7058	587.05	0.000876761
		587.94	0.00276		432	0.7207	587.94	0.00073395
		588.97	0.00296		431	0.72376	588.97	0.000719111
		590	0.00265		430	0.71447	590	0.000853665
		591.01	0.00278		429	0.69157	591.01	0.000773427
		592.02	0.0026		428	0.67443	592.02	0.000783663
		593.04	0.00237		427	0.64261	593.04	0.00070942
		594.05	0.00269		426	0.61662	594.05	0.000812585
		595.07	0.00269		425	0.58661	595.07	0.000760289
		595.94	0.00249		424	0.56696	595.94	0.000806856
		596.95	0.00237		423	0.54234	596.95	0.000757433
		597.97	0.00241		422	0.51955	597.97	0.000714974
		598.98	0.00252		421	0.50052	598.98	0.000887678
		600	0.00238		420	0.47853	600	0.000674482
					419	0.459
					418	0.4479
					417	0.42171
					416	0.42577
					415	0.42094
					414	0.40137
					413	0.40219
					412	0.39289
					411	0.39416
					410	0.37636
					409	0.38505
					408	0.38255
					407	0.38067
					406	0.38368
					405	0.37961
					404	0.38264
					403	0.38797
					402	0.38832
					401	0.39697
					400	0.40912
					399	0.41692
					398	0.42654
					397	0.43674
					396	0.45696
					395	0.4665
					394	0.47185
					393	0.48569
					392	0.4944
					391	0.50674
					390	0.51001
					389	0.51957
					388	0.52767
					387	0.54565
					386	0.55368
					385	0.57559
					384	0.61078
					383	0.6632
					382	0.71965
					381	0.81016
					380	0.89396
					379	0.9635
					378	1.04051
					377	1.09771
					376	1.15807
					375	1.19795
					374	1.24616
					373	1.27425
					372	1.29765
					371	1.30621
					370	1.30435
					369	1.29172
					368	1.26243
					367	1.24844
					366	1.19679
					365	1.16199
					364	1.14724
					363	1.11627
					362	1.11793
					361	1.09739
					360	1.04935
					359	1.0669
					358	0.99339
					357	0.9525
					356	0.95606
					355	1.02533
					354	0.95126
					353	0.93217
					352	0.95339
					351	0.89998
					350	0.98325
					349	0.92717
					348	0.86105
					347	0.51555
					346	1.00376
					345	1.07015
					344	0.67542
					343	0.79734
					342	1.08269
					341	0.76026
					340	0.91752
					339	1.15147
					338	1.09222
					337	1.05737
					336	0.81518
					335	1.0415
					334	0.90767
					333	1.01137
					332	0.89622
					331	1.02595
					330	1.19238
					329	1.05454
					328	1.00315
					327	1.19645
					326	0.72464
					325	0.79811
					324	1.02155
					323	0.79638
					322	1.04687
					321	0.8667
					320	1.23008
					319	1.11037
					318	1.01441
					317	1.06761
					316	1.03979
					315	1.04648
					314	1.05004
					313	0.98639
					312	1.30538
					311	1.13396
					310	1.05781
					309	0.95773
					308	1.07962
					307	1.17974
					306	1.20528
					305	1.17884
					304	1.31
					303	1.03615
					302	1.12704
					301	1.23241
					300	1.19915
