# Supplementary material for: Blue CdSe/CdS core/crown nanoplatelet light-emitting diodes obtained via a design-of-experiments approach
Source: Royal Society of Chemistry journal article supplement (doi:10.1039/d4nr03461a), 2024-11-13
Supplement: d4nr03461a1.zip [file Figure 6c and 6d.xlsx]

## Sheet: Foglio1
Figure 6c				Figure 6d
x-axis	y-axis (left)	y-axis (right)		x-axis	y-axis
Bias Voltage (V)	Current Density (mA/cm^2)	Luminance (Cd/m^2)		Current Density (mA/cm2)	EQE (%)
0.19959	2.81302e-05	0.03049		2.81302e-05	340.905
0.23273	3.40882e-05	-0.00217		3.40882e-05	-20.0649
0.26617	4.12333e-05	-0.0163		4.12333e-05	-124.337
0.29961	5.05169e-05	0.04602		5.05169e-05	286.515
0.33279	5.64367e-05	-0.00469		5.64367e-05	-26.158
0.36624	6.37084e-05	0.01778		6.37084e-05	87.7775
0.39938	6.88749e-05	0.02067		6.88749e-05	94.3856
0.43288	7.42576e-05	0.01432		7.42576e-05	60.6406
0.466	8.05096e-05	0.01447		8.05096e-05	56.5294
0.4995	8.71889e-05	0.01253		8.71889e-05	45.1823
0.53299	9.38231e-05	-0.04067		9.38231e-05	-136.331
0.56614	9.99189e-05	-0.000459174		9.99189e-05	-1.44535
0.59959	0.000106143	0.03789		0.000106143	112.268
0.63277	0.000113085	0.0189		0.000113085	52.5549
0.66627	0.000119492	-0.00091197		0.000119492	-2.40041
0.69943	0.000124676	0.00668		0.000124676	16.8603
0.73288	0.000132134	0.01092		0.000132134	25.9882
0.76635	0.000138251	0.04462		0.000138251	101.515
0.79952	0.000144691	0.01555		0.000144691	33.811
0.83303	0.000151664	0.00669		0.000151664	13.8734
0.86614	0.000157437	0.01565		0.000157437	31.2648
0.89961	0.000164006	0.03936		0.000164006	75.4837
0.93272	0.000170318	0.07483		0.000170318	138.189
0.9662	0.00017741	0.02147		0.00017741	38.0673
0.99944	0.000183484	0.0212		0.000183484	36.348
1.03291	0.00018936	-0.02258		0.00018936	-37.4976
1.06639	0.000196963	0.000267851		0.000196963	0.42771
1.09957	0.000204039	0.04728		0.000204039	72.8832
1.13299	0.000210511	0.02089		0.000210511	31.2145
1.16612	0.000216262	0.00855		0.000216262	12.4283
1.19963	0.000223411	0.01698		0.000223411	23.8996
1.23281	0.000230151	0.03198		0.000230151	43.6977
1.26626	0.000237224	-0.02694		0.000237224	-35.7151
1.29972	0.000244204	0.0039		0.000244204	5.02673
1.33291	0.000251624	0.01329		0.000251624	16.6124
1.36637	0.000259442	0.03583		0.000259442	43.4339
1.39952	0.000267124	-0.00423		0.000267124	-4.98588
1.43301	0.000275247	-0.06326		0.000275247	-72.2898
1.46611	0.000283182	-0.00807		0.000283182	-8.96009
1.49955	0.000291802	0.0286		0.000291802	30.8223
1.53303	0.000300987	-0.0023		0.000300987	-2.40573
1.5662	0.000309693	0.03079		0.000309693	31.2696
1.59963	0.000319007	0.05629		0.000319007	55.501
1.63276	0.000328391	0.01173		0.000328391	11.2386
1.66628	0.00033808	0.01453		0.00033808	13.5211
1.69945	0.000347947	0.00218		0.000347947	1.97152
1.73292	0.000357711	-0.0199		0.000357711	-17.4948
1.76637	0.000368618	0.06842		0.000368618	58.3754
1.79957	0.00038	0.05725		0.00038	47.3844
1.83303	0.000392164	0.04009		0.000392164	32.1561
1.86616	0.000404642	0.03538		0.000404642	27.4963
1.8996	0.000419853	-0.03293		0.000419853	-24.6704
1.93279	0.000434144	0.0146		0.000434144	10.5755
1.96628	0.000450336	0.0373		0.000450336	26.0471
1.99941	0.000468256	0.04611		0.000468256	30.9701
2.03289	0.000489956	0.02682		0.000489956	17.2187
2.06636	0.000512876	0.04748		0.000512876	29.1166
2.09952	0.000534549	0.03849		0.000534549	22.6453
2.13296	0.000563951	0.04577		0.000563951	25.5264
2.1661	0.000593284	0.03921		0.000593284	20.7888
2.19961	0.000624604	0.05969		0.000624604	30.0547
2.23278	0.000657184	0.04431		0.000657184	21.2061
2.26621	0.000691116	-0.03935		0.000691116	-17.907
2.29971	0.000725749	0.01488		0.000725749	6.45063
2.33287	0.000761724	0.02192		0.000761724	9.05043
2.36635	0.000799304	0.01226		0.000799304	4.82313
2.3995	0.000837262	-0.01775		0.000837262	-6.66714
2.43297	0.000876538	0.00988		0.000876538	3.54461
2.46606	0.000919916	0.03671		0.000919916	12.5527
2.49953	0.000970244	0.04151		0.000970244	13.4561
2.53301	0.00103	0.00484		0.00103	1.47461
2.56615	0.00112	0.04674		0.00112	13.166
2.59961	0.00125	0.05393		0.00125	13.6124
2.63282	0.00145	0.04622		0.00145	9.99965
2.66634	0.00179	0.041		0.00179	7.18669
2.69947	0.00234	0.04083		0.00234	5.49118
2.733	0.00324	-0.00141		0.00324	-0.13687
2.76614	0.00461	0.054		0.00461	3.68113
2.79964	0.0067	0.01785		0.0067	0.83845
2.83311	0.00972	0.06693		0.00972	2.16559
2.86627	0.01391	0.02671		0.01391	0.60425
2.89968	0.0196	0.0968		0.0196	1.55294
2.93278	0.02699	0.1087		0.02699	1.26664
2.96632	0.0365	0.07693		0.0365	0.66291
2.99947	0.04818	0.19693		0.04818	1.28552
3.033	0.06249	0.18798		0.06249	0.94606
3.06643	0.07952	0.20763		0.07952	0.82118
3.09957	0.09918	0.13742		0.09918	0.43579
3.13301	0.12193	0.25169		0.12193	0.64921
3.16616	0.14735	0.29656		0.14735	0.63299
3.19963	0.17585	0.35738		0.17585	0.63919
3.23277	0.20669	0.36525		0.20669	0.55579
3.26624	0.2404	0.43785		0.2404	0.57284
3.29983	0.27643	0.46645		0.27643	0.53072
3.33299	0.31419	0.49852		0.31419	0.49903
3.36648	0.35444	0.56275		0.35444	0.49937
3.39961	0.39639	0.63332		0.39639	0.5025
3.43308	0.44103	0.70825		0.44103	0.50508
3.46625	0.48766	0.76766		0.48766	0.4951
3.49972	0.53738	0.84505		0.53738	0.49459
3.53287	0.58937	0.88139		0.58937	0.47035
3.56633	0.64473	1.02974		0.64473	0.50234
3.59979	0.70323	1.08654		0.70323	0.48595
3.63295	0.7644	1.20316		0.7644	0.49505
3.66642	0.82945	1.29555		0.82945	0.49126
3.69958	0.89737	1.3523		0.89737	0.47396
3.73309	0.96955	1.49856		0.96955	0.48612
3.76621	1.04464	1.53036		1.04464	0.46075
3.79971	1.12424	1.63211		1.12424	0.4566
3.83317	1.20774	1.71397		1.20774	0.44635
3.86631	1.29431	1.8218		1.29431	0.4427
3.8998	1.38601	1.99709		1.38601	0.45318
3.93296	1.48084	2.13499		1.48084	0.45345
3.9664	1.58074	2.21201		1.58074	0.44012
3.99957	1.6843	2.34273		1.6843	0.43747
4.03308	1.79304	2.47858		1.79304	0.43477
4.06655	1.90645	2.66626		1.90645	0.43987
4.09968	2.02311	2.75217		2.02311	0.42786
4.13313	2.14566	2.92161		2.14566	0.42826
4.16628	2.27133	3.08531		2.27133	0.42723
4.19975	2.40338	3.26297		2.40338	0.42701
4.23293	2.53836	3.43309		2.53836	0.42538
4.26638	2.68011	3.65762		2.68011	0.42923
4.29983	2.82689	3.76795		2.82689	0.41922
4.33299	2.9778	4.03141		2.9778	0.4258
4.36645	3.13504	4.12364		3.13504	0.41369
4.39963	3.29613	4.40949		3.29613	0.42075
4.43309	3.46396	4.58634		3.46396	0.41643
4.46626	3.63536	4.73952		3.63536	0.41004
4.49974	3.8138	5.06328		3.8138	0.41756
4.53291	3.99511	5.21775		3.99511	0.41077
4.56639	4.18449	5.48175		4.18449	0.41202
4.59986	4.3796	5.72132		4.3796	0.41087
4.63304	4.57753	5.95101		4.57753	0.40889
4.6665	4.78331	6.22776		4.78331	0.40949
4.69964	4.99262	6.44682		4.99262	0.40613
4.73312	5.20976	6.72933		5.20976	0.40625
4.7663	5.43004	7.01069		5.43004	0.40607
4.79975	5.65849	7.24955		5.65849	0.40295
4.83324	5.89191	7.56267		5.89191	0.4037
4.86637	6.1288	7.83944		6.1288	0.4023
4.89985	6.37378	8.11907		6.37378	0.40064
4.93299	6.62147	8.43515		6.62147	0.40066
4.96646	6.87698	8.76396		6.87698	0.40082
4.9996	7.13582	9.02986		7.13582	0.398
5.03309	7.40182	9.35581		7.40182	0.39754
5.06657	7.67502	9.6699		7.67502	0.39626
5.09969	7.94673	10.0211		7.94673	0.39662
5.13315	8.23024	10.3256		8.23024	0.39459
5.1663	8.51684	10.7127		8.51684	0.39561
5.19976	8.81056	11.0366		8.81056	0.39398
5.23291	9.10738	11.4008		9.10738	0.39372
5.26636	9.41096	11.7773		9.41096	0.3936
5.29954	9.71744	12.1171		9.71744	0.39218
5.33304	10.0337	12.4562		10.0337	0.39045
5.36651	10.3554	12.9563		10.3554	0.39351
5.39964	10.6772	13.2624		10.6772	0.39067
5.43311	11.0097	13.7252		11.0097	0.39209
5.46628	11.343	14.1058		11.343	0.39112
5.49976	11.6796	14.5179		11.6796	0.39095
5.5329	12.0219	14.8722		12.0219	0.38909
5.5664	12.3746	15.3366		12.3746	0.3898
5.59983	12.7324	15.7044		12.7324	0.38793
5.63301	13.0911	16.1536		13.0911	0.3881
5.66647	13.4601	16.5743		13.4601	0.38728
5.69966	13.831	17.0559		13.831	0.38785
5.73313	14.2102	17.5282		14.2102	0.38795
5.76626	14.5902	17.9758		14.5902	0.3875
5.79975	14.98	18.4394		14.98	0.38715
5.83324	15.3768	18.9597		15.3768	0.3878
5.86638	15.7732	19.4229		15.7732	0.38729
5.89984	16.1808	19.8657		16.1808	0.38614
5.933	16.5874	20.3394		16.5874	0.38566
5.96649	17.0069	20.8741		17.0069	0.38603
5.99962	17.4281	21.4375		17.4281	0.38687
6.03308	17.857	21.9468		17.857	0.38655
6.06659	18.2941	22.4243		18.2941	0.38552
6.09975	18.731	22.9333		18.731	0.38508
6.13322	19.1823	23.4596		19.1823	0.38465
6.16635	19.6344	24.0492		19.6344	0.38524
6.19985	20.0986	24.596		20.0986	0.3849
6.23299	20.5647	25.1686		20.5647	0.38493
6.26644	21.0305	25.6584		21.0305	0.38373
6.2996	21.5124	26.3165		21.5124	0.38475
6.33305	22.0081	26.8835		22.0081	0.38419
6.36655	22.4958	27.4595		22.4958	0.38391
6.39976	23.0002	27.9811		23.0002	0.38263
6.43322	23.5213	28.6897		23.5213	0.38363
6.46634	24.0482	29.2697		24.0482	0.38281
6.49984	24.5904	29.8413		24.5904	0.38168
6.53299	25.1364	30.5291		25.1364	0.38199
6.56648	25.7033	31.2166		25.7033	0.38198
6.59994	26.2776	31.8621		26.2776	0.38136
6.63312	26.8653	32.5759		26.8653	0.38137
6.66656	27.4676	33.2774		27.4676	0.38104
6.69972	28.0782	33.9471		28.0782	0.38026
6.73319	28.7076	34.6789		28.7076	0.37994
6.76636	29.3471	35.4203		29.3471	0.3796
6.79983	30.0087	36.16		30.0087	0.37899
6.83327	30.6847	36.9231		30.6847	0.37846
6.86646	31.3707	37.7069		31.3707	0.37804
6.89992	32.074	38.4706		32.074	0.37724
6.93308	32.7922	39.3126		32.7922	0.37705
6.96656	33.5347	40.0598		33.5347	0.37571
6.99969	34.2887	40.9498		34.2887	0.37562
7.03315	35.068	41.8505		35.068	0.37535
7.06629	35.8598	42.5596		35.8598	0.37328
7.09976	36.6802	43.5516		36.6802	0.37343
7.13323	37.5196	44.4493		37.5196	0.37261
7.16635	38.3704	45.3889		38.3704	0.37205
7.19984	39.2531	46.3293		39.2531	0.37121
7.233	40.148	47.2306		40.148	0.37
7.2665	41.0751	48.2922		41.0751	0.36978
7.29963	42.014	49.1468		42.014	0.36791
7.3331	42.9829	50.2293		42.9829	0.36754
7.3666	43.9778	51.2387		43.9778	0.36644
7.39974	44.9847	52.2238		44.9847	0.36513
7.43322	46.0282	53.3067		46.0282	0.36425
7.46638	47.082	54.3526		47.082	0.36309
7.49985	48.1696	55.4954		48.1696	0.36235
7.53302	49.2711	56.525		49.2711	0.36082
7.56649	50.4073	57.7187		50.4073	0.36014
7.59994	51.5673	58.7876		51.5673	0.35855
7.63313	52.7424	59.973		52.7424	0.35763
7.6666	53.9529	61.0979		53.9529	0.35617
7.69973	55.1744	62.295		55.1744	0.35511
7.73321	56.4364	63.4795		56.4364	0.35377
7.76634	57.7111	64.594		57.7111	0.35203
7.79982	59.0187	65.82		59.0187	0.35076
7.83326	60.3533	67.116		60.3533	0.34976
7.8665	61.7042	68.3404		61.7042	0.34834
7.89993	63.088	69.5645		63.088	0.3468
7.93308	64.4862	70.8127		64.4862	0.34537
7.96657	65.9198	72.136		65.9198	0.34418
7.99974	67.3673	73.3566		67.3673	0.34248
8.03318	68.8496	74.6573		68.8496	0.34105
8.06629	70.3413	75.9344		70.3413	0.33952
8.09976	71.8753	77.2312		71.8753	0.33795
8.13321	73.4329	78.5935		73.4329	0.33662
8.16642	75.0056	79.8318		75.0056	0.33475
8.19989	76.6133	81.2953		76.6133	0.33374
8.23305	78.2336	82.5584		78.2336	0.3319
8.26654	79.8942	83.8514		79.8942	0.33009
8.29969	81.5589	85.2321		81.5589	0.32868
8.33315	83.2676	86.6381		83.2676	0.32725
8.36658	85.0018	87.9668		85.0018	0.32549
8.39972	86.7378	89.2588		86.7378	0.32366
8.43325	88.5142	90.6484		88.5142	0.3221
8.46639	90.3004	91.9679		90.3004	0.32032
8.4999	92.1529	93.3014		92.1529	0.31844
8.53305	93.9607	94.5821		93.9607	0.3166
8.56651	95.8244	96.0027		95.8244	0.3151
8.59998	97.7184	97.3163		97.7184	0.31322
8.63316	99.6256	98.7464		99.6256	0.31174
8.66665	101.579	100.132		101.579	0.31004
8.69978	103.54	101.528		103.54	0.3084
8.73325	105.545	102.867		105.545	0.30654
8.76646	107.558	104.221		107.558	0.30476
8.7999	109.613	105.648		109.613	0.30314
8.83306	111.677	107.047		111.677	0.30148
8.86655	113.787	108.438		113.787	0.29973
8.89997	115.919	109.806		115.919	0.29793
8.93311	118.059	111.201		118.059	0.29625
8.96657	120.24	112.563		120.24	0.29444
8.99972	122.428	113.935		122.428	0.2927
9.03321	124.666	115.235		124.666	0.29073
9.06633	126.901	116.626		126.901	0.28905
9.09982	129.187	117.995		129.187	0.28727
9.13325	131.498	119.401		131.498	0.28558
9.1664	133.82	120.713		133.82	0.28371
9.19988	136.186	122.133		136.186	0.28206
9.23304	138.555	123.444		138.555	0.28022
9.26648	140.968	124.813		140.968	0.27847
9.29964	143.393	126.148		143.393	0.27669
9.3331	145.866	127.464		145.866	0.27484
9.36657	148.368	128.871		148.368	0.27319
9.3997	150.871	130.149		150.871	0.27132
9.43319	153.421	131.477		153.421	0.26953
9.46636	155.972	132.8		155.972	0.26779
9.49984	158.573	134.058		158.573	0.26589
9.533	161.175	135.344		161.175	0.26411
9.56647	163.829	136.676		163.829	0.26239
9.59993	166.516	137.971		166.516	0.2606
9.63308	169.2	139.23		169.2	0.25881
9.66658	171.94	140.497		171.94	0.257
9.69972	174.678	141.718		174.678	0.25517
9.73321	177.458	142.949		177.458	0.25335
9.76635	180.239	144.182		180.239	0.2516
9.79984	183.075	145.419		183.075	0.24982
9.83301	185.906	146.57		185.906	0.24797
9.86644	188.802	147.774		188.802	0.24617
9.89991	191.714	149.006		191.714	0.24445
9.93305	194.637	150.197		194.637	0.2427
9.96652	197.608	151.369		197.608	0.24092
