# Supplementary material for: Blue CdSe/CdS core/crown nanoplatelet light-emitting diodes obtained via a design-of-experiments approach
Source: Royal Society of Chemistry journal article supplement (doi:10.1039/d4nr03461a), 2024-11-13
Supplement: d4nr03461a1.zip [file Figure S4.xlsx]

## Sheet: Foglio1
	Figure S4a
	x-axis	y-axis
	TPBi (nm) / PTAA (mg/mL)	EQE (%)
	30/10	0.37	0.68	0.34	0.4	0.36	0.3	0.5	0.47	0.47	0.29	0.16	0.31	0.12	0.29	0.41	0.25
	35/10	0.59	0.66	0.47	0.37	0.41	0.42	0.41	0.33	0.92	1.08	0.33
	40/10	0.48	0.37	0.29	0.35	0.23	0.38	0.23	0.65	0.28
	30/14	0.35	0.29	0.29	0.32	0.59	0.22	0.55	0.46	0.35	0.53	0.48
	35/14	0.78	0.61	0.9	1
	40/14	0.99	0.73	0.54	1.17	0.6	0.77	0.59	0.93	0.39	0.78	0.34	0.92
	30/18	0.21	0.34	0.23	0.42	0.5	0.18	0.18	0.25	0.46	0.66	0.45	0.28	0.27
	35/18	0.85	0.8	0.89	0.35	0.83	0.35	0.64
	40/18	0.96	0.99	0.9	0.56	0.55	1.3	1.2	1.05
	Figure S4b
	x-axis	y-axis
	TPBi (nm) / PTAA (mg/mL)	Luminance (Cd/m^2)
	30/10	97	103	74	93	127	89
	35/10	95	142	138	79	120	157
	40/10	68	78	52	69	50
	30/14	93	108	97	87	94	108	107	119	104	127	93
	35/14	46	52	58	63
	40/14	149	172	92	148	127	160
	30/18	98	100	82	121	61
	35/18	95	108	74	66	72
	40/18	141	121	108	105	113
