# Supplementary material for: Blue CdSe/CdS core/crown nanoplatelet light-emitting diodes obtained via a design-of-experiments approach
Source: Royal Society of Chemistry journal article supplement (doi:10.1039/d4nr03461a), 2024-11-13
Supplement: d4nr03461a1.zip [file Figure S6.xlsx]

## Sheet: Foglio1
Figure S6b
x-axis	y-axis
Wavelength (nm)	EL intensity (arb.u.)
343.641	20
343.905	10
344.169	-3
344.433	10
344.697	4
344.961	-3
345.224	8
345.488	10
345.752	4
346.016	7
346.28	12
346.544	1
346.808	4
347.072	16
347.336	11
347.6	0
347.864	6
348.128	11
348.392	12
348.656	7
348.92	12
349.184	16
349.447	10
349.711	9
349.975	8
350.239	11
350.503	14
350.767	17
351.031	17
351.295	11
351.559	-1
351.823	11
352.087	10
352.351	2
352.615	9
352.878	9
353.142	5
353.406	8
353.67	9
353.934	11
354.198	13
354.462	5
354.726	8
354.99	12
355.254	9
355.518	7
355.782	18
356.045	12
356.309	9
356.573	15
356.837	4
357.101	1
357.365	19
357.629	12
357.893	8
358.157	16
358.421	8
358.685	6
358.948	5
359.212	-1
359.476	15
359.74	9
360.004	5
360.268	25
360.532	9
360.796	9
361.06	15
361.324	19
361.587	19
361.851	12
362.115	16
362.379	2
362.643	14
362.907	8
363.171	19
363.435	20
363.699	7
363.962	30
364.226	16
364.49	8
364.754	13
365.018	13
365.282	19
365.546	19
365.81	21
366.074	16
366.337	26
366.601	18
366.865	32
367.129	19
367.393	16
367.657	23
367.921	26
368.185	23
368.448	22
368.712	19
368.976	28
369.24	31
369.504	28
369.768	30
370.032	20
370.296	32
370.559	29
370.823	37
371.087	22
371.351	26
371.615	34
371.879	25
372.143	28
372.407	36
372.67	31
372.934	32
373.198	38
373.462	35
373.726	33
373.99	41
374.254	47
374.517	39
374.781	29
375.045	35
375.309	44
375.573	40
375.837	52
376.101	53
376.364	44
376.628	54
376.892	43
377.156	69
377.42	48
377.684	55
377.947	52
378.211	63
378.475	62
378.739	52
379.003	59
379.267	68
379.53	68
379.794	79
380.058	64
380.322	54
380.586	65
380.85	66
381.114	67
381.377	58
381.641	59
381.905	75
382.169	69
382.433	69
382.697	67
382.96	75
383.224	65
383.488	75
383.752	85
384.016	85
384.279	79
384.543	89
384.807	102
385.071	89
385.335	90
385.599	92
385.862	83
386.126	80
386.39	89
386.654	101
386.918	95
387.181	105
387.445	98
387.709	81
387.973	102
388.237	86
388.501	97
388.764	101
389.028	111
389.292	108
389.556	102
389.82	96
390.083	121
390.347	113
390.611	107
390.875	91
391.139	123
391.402	108
391.666	93
391.93	109
392.194	110
392.458	115
392.721	113
392.985	117
393.249	115
393.513	117
393.776	118
394.04	132
394.304	121
394.568	120
394.832	125
395.095	119
395.359	142
395.623	125
395.887	148
396.151	127
396.414	116
396.678	131
396.942	139
397.206	130
397.469	127
397.733	130
397.997	116
398.261	134
398.525	137
398.788	148
399.052	142
399.316	143
399.58	138
399.843	138
400.107	129
400.371	140
400.635	139
400.898	121
401.162	155
401.426	153
401.69	152
401.954	127
402.217	152
402.481	150
402.745	135
403.009	135
403.272	161
403.536	168
403.8	155
404.064	163
404.327	158
404.591	149
404.855	157
405.119	155
405.382	151
405.646	165
405.91	132
406.174	150
406.437	140
406.701	167
406.965	162
407.229	152
407.492	157
407.756	153
408.02	149
408.283	170
408.547	154
408.811	160
409.075	154
409.338	160
409.602	146
409.866	153
410.13	169
410.393	155
410.657	183
410.921	155
411.185	174
411.448	159
411.712	164
411.976	160
412.239	181
412.503	165
412.767	185
413.031	177
413.294	182
413.558	179
413.822	177
414.085	165
414.349	174
414.613	178
414.877	168
415.14	196
415.404	167
415.668	182
415.931	160
416.195	190
416.459	174
416.723	198
416.986	184
417.25	189
417.514	178
417.777	201
418.041	201
418.305	196
418.568	185
418.832	189
419.096	177
419.359	168
419.623	174
419.887	199
420.151	171
420.414	209
420.678	190
420.942	183
421.205	181
421.469	208
421.733	182
421.996	193
422.26	196
422.524	182
422.787	204
423.051	188
423.315	182
423.578	208
423.842	195
424.106	199
424.369	193
424.633	183
424.897	216
425.16	188
425.424	206
425.688	208
425.951	188
426.215	210
426.479	201
426.742	170
427.006	197
427.27	189
427.533	201
427.797	185
428.061	204
428.324	189
428.588	203
428.852	199
429.115	216
429.379	200
429.643	194
429.906	201
430.17	202
430.434	216
430.697	196
430.961	220
431.225	228
431.488	186
431.752	203
432.015	209
432.279	203
432.543	218
432.806	196
433.07	199
433.334	221
433.597	190
433.861	222
434.125	211
434.388	237
434.652	208
434.915	196
435.179	220
435.443	212
435.706	220
435.97	211
436.234	224
436.497	210
436.761	214
437.024	228
437.288	223
437.552	216
437.815	224
438.079	234
438.342	241
438.606	217
438.87	232
439.133	216
439.397	223
439.661	242
439.924	211
440.188	235
440.451	249
440.715	253
440.979	253
441.242	262
441.506	253
441.769	253
442.033	248
442.297	254
442.56	258
442.824	249
443.087	247
443.351	272
443.615	275
443.878	276
444.142	310
444.405	304
444.669	299
444.932	315
445.196	306
445.46	324
445.723	362
445.987	336
446.25	358
446.514	373
446.777	370
447.041	403
447.305	416
447.568	418
447.832	445
448.095	483
448.359	471
448.622	487
448.886	500
449.15	555
449.413	588
449.677	604
449.94	673
450.204	658
450.467	708
450.731	676
450.995	754
451.258	827
451.522	839
451.785	926
452.049	1011
452.312	1011
452.576	1136
452.839	1188
453.103	1267
453.366	1302
453.63	1370
453.894	1507
454.157	1575
454.421	1597
454.684	1818
454.948	1871
455.211	2015
455.475	2220
455.738	2340
456.002	2488
456.265	2689
456.529	2785
456.792	2978
457.056	3184
457.319	3307
457.583	3463
457.847	3700
458.11	3829
458.374	4127
458.637	4204
458.901	4458
459.164	4658
459.428	4968
459.691	5030
459.955	5335
460.218	5576
460.482	5784
460.745	5984
461.009	6221
461.272	6451
461.536	6727
461.799	6941
462.063	7306
462.326	7506
462.59	7673
462.853	8033
463.117	8124
463.38	8425
463.644	8513
463.907	8686
464.171	9003
464.434	9090
464.698	9269
464.961	9507
465.225	9597
465.488	9607
465.752	10011
466.015	9869
466.279	9933
466.542	10205
466.806	10249
467.069	10128
467.332	10207
467.596	10131
467.859	10136
468.123	10256
468.386	10130
468.65	10079
468.913	9909
469.177	9908
469.44	9764
469.704	9739
469.967	9519
470.231	9354
470.494	9245
470.758	9184
471.021	8985
471.284	8836
471.548	8545
471.811	8381
472.075	8274
472.338	8063
472.602	7772
472.865	7560
473.129	7260
473.392	7102
473.656	6969
473.919	6637
474.182	6430
474.446	6147
474.709	5903
474.973	5692
475.236	5435
475.5	5326
475.763	4967
476.026	4733
476.29	4599
476.553	4276
476.817	4181
477.08	3969
477.344	3845
477.607	3556
477.87	3396
478.134	3319
478.397	3081
478.661	2978
478.924	2890
479.188	2714
479.451	2666
479.714	2478
479.978	2360
480.241	2316
480.505	2169
480.768	2132
481.031	2038
481.295	1953
481.558	1920
481.822	1865
482.085	1764
482.349	1663
482.612	1643
482.875	1587
483.139	1472
483.402	1418
483.665	1400
483.929	1341
484.192	1263
484.456	1236
484.719	1184
484.982	1183
485.246	1169
485.509	1133
485.773	1033
486.036	981
486.299	1000
486.563	997
486.826	948
487.089	933
487.353	906
487.616	897
487.88	887
488.143	867
488.406	797
488.67	827
488.933	755
489.196	774
489.46	719
489.723	729
489.987	732
490.25	716
490.513	662
490.777	649
491.04	678
491.303	612
491.567	616
491.83	586
492.093	617
492.357	581
492.62	556
492.883	558
493.147	542
493.41	552
493.673	505
493.937	490
494.2	523
494.463	487
494.727	467
494.99	497
495.253	443
495.517	491
495.78	483
496.043	469
496.307	460
496.57	448
496.833	447
497.097	411
497.36	432
497.623	405
497.887	403
498.15	388
498.413	393
498.677	395
498.94	387
499.203	377
499.467	369
499.73	377
499.993	370
500.256	375
500.52	338
500.783	392
501.046	371
501.31	341
501.573	350
501.836	363
502.1	346
502.363	331
502.626	345
502.889	332
503.153	327
503.416	315
503.679	321
503.943	326
504.206	319
504.469	326
504.732	328
504.996	329
505.259	307
505.522	312
505.786	298
506.049	290
506.312	308
506.575	312
506.839	311
507.102	288
507.365	310
507.628	289
507.892	272
508.155	289
508.418	307
508.681	282
508.945	304
509.208	279
509.471	307
509.734	267
509.998	270
510.261	294
510.524	260
510.787	265
511.051	275
511.314	267
511.577	265
511.84	276
512.104	255
512.367	262
512.63	260
512.893	261
513.157	251
513.42	255
513.683	254
513.946	271
514.209	255
514.473	235
514.736	273
514.999	260
515.262	262
515.526	234
515.789	251
516.052	240
516.315	249
516.578	249
516.842	237
517.105	246
517.368	234
517.631	254
517.894	268
518.158	231
518.421	253
518.684	231
518.947	244
519.21	251
519.474	258
519.737	237
520	252
520.263	242
520.526	240
520.79	240
521.053	225
521.316	224
521.579	241
521.842	230
522.105	230
522.369	218
522.632	234
522.895	251
523.158	227
523.421	235
523.685	241
523.948	232
524.211	228
524.474	232
524.737	224
525	239
525.263	230
525.527	232
525.79	234
526.053	227
526.316	229
526.579	231
526.842	254
527.106	211
527.369	225
527.632	231
527.895	209
528.158	216
528.421	232
528.684	245
528.948	227
529.211	222
529.474	224
529.737	212
530	248
530.263	227
530.526	240
530.789	228
531.053	222
531.316	245
531.579	220
531.842	222
532.105	233
532.368	208
532.631	212
532.894	239
533.158	219
533.421	221
533.684	247
533.947	244
534.21	210
534.473	224
534.736	228
534.999	246
535.262	228
535.525	255
535.789	235
536.052	237
536.315	239
536.578	212
536.841	223
537.104	239
537.367	221
537.63	205
537.893	227
538.156	237
538.419	241
538.682	216
538.946	218
539.209	226
539.472	241
539.735	229
539.998	234
540.261	214
540.524	217
540.787	239
541.05	207
541.313	240
541.576	247
541.839	226
542.102	213
542.365	241
542.628	235
542.891	259
543.155	223
543.418	230
543.681	245
543.944	216
544.207	249
544.47	227
544.733	231
544.996	248
545.259	250
545.522	237
545.785	241
546.048	231
546.311	246
546.574	233
546.837	242
547.1	207
547.363	255
547.626	238
547.889	245
548.152	242
548.415	246
548.678	236
548.941	210
549.204	244
549.467	258
549.73	247
549.993	220
550.256	233
550.519	223
550.782	220
551.045	232
551.308	235
551.571	242
551.834	235
552.097	233
552.36	231
552.623	237
552.886	246
553.149	220
553.412	225
553.675	254
553.938	232
554.201	244
554.464	203
554.727	238
554.99	232
555.253	234
555.516	236
555.779	222
556.042	225
556.305	237
556.568	230
556.831	234
557.094	223
557.357	229
557.62	220
557.883	246
558.145	238
558.408	223
558.671	224
558.934	231
559.197	247
559.46	231
559.723	219
559.986	227
560.249	227
560.512	242
560.775	213
561.038	228
561.301	237
561.564	242
561.827	213
562.09	245
562.352	213
562.615	224
562.878	234
563.141	246
563.404	209
563.667	226
563.93	215
564.193	208
564.456	228
564.719	209
564.982	222
565.245	227
565.507	231
565.77	209
566.033	237
566.296	229
566.559	227
566.822	216
567.085	223
567.348	224
567.611	222
567.873	211
568.136	243
568.399	225
568.662	229
568.925	211
569.188	219
569.451	221
569.714	217
569.976	230
570.239	215
570.502	206
570.765	216
571.028	234
571.291	207
571.554	231
571.817	219
572.079	200
572.342	220
572.605	220
572.868	219
573.131	221
573.394	220
573.656	223
573.919	219
574.182	226
574.445	223
574.708	205
574.971	239
575.234	215
575.496	230
575.759	232
576.022	220
576.285	227
576.548	203
576.81	217
577.073	216
577.336	239
577.599	211
577.862	210
578.125	232
578.387	217
578.65	229
578.913	212
579.176	212
579.439	195
579.701	220
579.964	223
580.227	228
580.49	222
580.753	233
581.015	223
581.278	212
581.541	214
581.804	210
582.067	224
582.329	228
582.592	211
582.855	206
583.118	195
583.38	212
583.643	205
583.906	226
584.169	191
584.432	231
584.694	213
584.957	205
585.22	215
585.483	207
585.745	188
586.008	203
586.271	198
586.534	206
586.796	204
587.059	209
587.322	195
587.585	208
587.847	200
588.11	196
588.373	221
588.636	216
588.898	220
589.161	220
589.424	224
589.687	206
589.949	196
590.212	182
590.475	176
590.738	205
591	209
591.263	191
591.526	189
591.788	199
592.051	227
592.314	199
592.577	220
592.839	211
593.102	187
593.365	195
593.627	187
593.89	203
594.153	182
594.415	197
594.678	201
594.941	207
595.204	212
595.466	185
595.729	198
595.992	212
596.254	185
596.517	186
596.78	199
597.042	190
597.305	178
597.568	208
597.83	224
598.093	215
598.356	185
598.618	203
598.881	193
599.144	202
599.406	187
599.669	187
599.932	196
600.194	186
600.457	197
600.72	193
600.982	193
601.245	190
601.508	198
601.77	200
602.033	202
602.295	192
602.558	179
602.821	195
603.083	175
603.346	161
603.609	205
603.871	182
604.134	181
604.397	214
604.659	197
604.922	202
605.184	206
605.447	194
605.71	174
605.972	190
606.235	174
606.497	179
606.76	162
607.023	188
607.285	178
607.548	181
607.81	188
608.073	176
608.336	183
608.598	186
608.861	174
609.123	190
609.386	180
609.649	176
609.911	177
610.174	176
610.436	186
610.699	166
610.962	175
611.224	172
611.487	159
611.749	200
612.012	188
612.274	174
612.537	199
612.799	175
613.062	179
613.325	164
613.587	203
613.85	179
614.112	182
614.375	156
614.637	169
614.9	187
615.162	174
615.425	175
615.688	167
615.95	168
616.213	180
616.475	177
616.738	166
617	186
617.263	184
617.525	160
617.788	167
618.05	175
618.313	161
618.575	174
618.838	172
619.1	181
619.363	170
619.625	182
619.888	154
620.15	163
620.413	165
620.675	150
620.938	167
621.2	163
621.463	188
621.725	170
621.988	176
622.25	170
622.513	181
622.775	189
623.038	181
623.3	154
623.563	169
623.825	177
624.088	150
624.35	171
624.613	173
624.875	162
625.138	164
625.4	176
625.662	194
625.925	173
626.187	175
626.45	159
626.712	171
626.975	186
627.237	163
627.5	172
627.762	169
628.024	176
628.287	173
628.549	187
628.812	165
629.074	178
629.337	198
629.599	159
629.862	164
630.124	147
630.386	167
630.649	179
630.911	144
631.174	166
631.436	161
631.698	169
631.961	182
632.223	172
632.486	153
632.748	166
633.01	150
633.273	171
633.535	172
633.798	169
634.06	160
634.322	148
634.585	158
634.847	152
635.11	154
635.372	161
635.634	169
635.897	165
636.159	158
636.422	174
636.684	160
636.946	149
637.209	161
637.471	167
637.733	161
637.996	164
638.258	165
638.52	154
638.783	162
639.045	150
639.308	153
639.57	146
639.832	164
640.095	169
640.357	154
640.619	173
640.882	158
641.144	147
641.406	145
641.669	161
641.931	147
642.193	142
642.456	149
642.718	132
642.98	143
643.242	133
643.505	159
643.767	140
644.029	162
644.292	151
644.554	148
644.816	143
645.079	152
645.341	139
645.603	155
645.866	142
646.128	151
646.39	171
646.652	149
646.915	162
647.177	139
647.439	152
647.702	151
647.964	156
648.226	158
648.488	160
648.751	151
649.013	151
649.275	136
649.537	159
649.8	152
650.062	140
650.324	126
650.587	158
650.849	132
651.111	146
651.373	144
651.636	135
651.898	129
652.16	134
652.422	138
652.685	136
652.947	130
653.209	154
653.471	155
653.733	131
653.996	147
654.258	152
654.52	126
654.782	140
655.045	144
655.307	139
655.569	134
655.831	144
656.093	129
656.356	139
656.618	121
656.88	120
657.142	145
657.404	126
657.667	124
657.929	146
658.191	136
658.453	133
658.715	147
658.978	141
659.24	146
659.502	125
659.764	124
660.026	137
660.289	141
660.551	126
660.813	121
661.075	126
661.337	148
661.599	134
661.862	150
662.124	131
662.386	132
662.648	147
662.91	142
663.172	141
663.434	112
663.697	151
663.959	123
664.221	126
664.483	131
664.745	128
665.007	142
665.269	114
665.532	126
665.794	132
666.056	121
666.318	111
666.58	125
666.842	127
667.104	124
667.366	108
667.629	128
667.891	120
668.153	147
668.415	132
668.677	125
668.939	123
669.201	138
669.463	155
669.725	135
669.987	123
670.25	114
670.512	119
670.774	139
671.036	121
671.298	123
671.56	126
671.822	114
672.084	140
672.346	126
672.608	142
672.87	123
673.132	121
673.394	133
673.656	120
673.919	144
674.181	135
674.443	126
674.705	136
674.967	135
675.229	118
675.491	128
675.753	117
676.015	122
676.277	130
676.539	129
676.801	121
677.063	126
677.325	116
677.587	118
677.849	114
678.111	114
678.373	119
678.635	123
678.897	108
679.159	125
679.421	119
679.683	109
679.945	130
680.207	110
680.469	115
680.731	124
680.993	120
681.255	126
681.517	125
681.779	115
682.041	123
682.303	110
682.565	111
682.827	106
683.089	124
683.351	116
683.613	103
683.875	115
684.137	109
684.399	126
684.661	104
684.923	111
685.185	107
685.447	101
685.709	115
685.971	105
686.233	100
686.495	121
686.756	109
687.018	100
687.28	116
687.542	120
687.804	135
688.066	124
688.328	109
688.59	104
688.852	112
689.114	108
689.376	106
689.638	123
689.9	112
690.162	98
690.423	107
690.685	101
690.947	126
691.209	108
691.471	103
691.733	112
691.995	118
692.257	93
692.519	108
692.78	96
693.042	109
693.304	108
693.566	96
693.828	102
694.09	109
694.352	95
694.614	114
694.876	99
695.137	97
695.399	107
695.661	119
695.923	96
