# Supplementary material for: Blue CdSe/CdS core/crown nanoplatelet light-emitting diodes obtained via a design-of-experiments approach
Source: Royal Society of Chemistry journal article supplement (doi:10.1039/d4nr03461a), 2024-11-13
Supplement: d4nr03461a1.zip [file Figures S2 S3.xlsx]

## Sheet: Foglio1
Figure S2
x-axis		y-axis
KE_wide/3	BE_wide/3	CPS_wide/3	Background_wide/3			Characteristic Energy eV	1486.6
287.457	1199.14	282260	282260			Acquisition Time s	0.1
288.457	1198.14	282040	282040
289.457	1197.14	282960	282960
290.457	1196.14	283070	283070
291.457	1195.14	280860	280860
292.457	1194.14	281820	281820
293.457	1193.14	284140	284140
294.457	1192.14	283470	283470
295.457	1191.14	284540	284540
296.457	1190.14	284450	284450
297.457	1189.14	282520	282520
298.457	1188.14	280690	280690
299.457	1187.14	282450	282450
300.457	1186.14	284200	284200
301.457	1185.14	281230	281230
302.457	1184.14	284370	284370
303.457	1183.14	284600	284600
304.457	1182.14	284580	284580
305.457	1181.14	282770	282770
306.457	1180.14	283400	283400
307.457	1179.14	285540	285540
308.457	1178.14	286940	286940
309.457	1177.14	283660	283660
310.457	1176.14	284840	284840
311.457	1175.14	286800	286800
312.457	1174.14	285690	285690
313.457	1173.14	286870	286870
314.457	1172.14	285130	285130
315.457	1171.14	281600	281600
316.457	1170.14	282760	282760
317.457	1169.14	282910	282910
318.457	1168.14	283590	283590
319.457	1167.14	282320	282320
320.457	1166.14	280420	280420
321.457	1165.14	280200	280200
322.457	1164.14	279520	279520
323.457	1163.14	274290	274290
324.457	1162.14	272980	272980
325.457	1161.14	274300	274300
326.457	1160.14	270040	270040
327.457	1159.14	268740	268740
328.457	1158.14	263310	263310
329.457	1157.14	263790	263790
330.457	1156.14	263130	263130
331.457	1155.14	261710	261710
332.457	1154.14	260930	260930
333.457	1153.14	258760	258760
334.457	1152.14	260980	260980
335.457	1151.14	260940	260940
336.457	1150.14	261250	261250
337.457	1149.14	261110	261110
338.457	1148.14	261800	261800
339.457	1147.14	262160	262160
340.457	1146.14	259390	259390
341.457	1145.14	261750	261750
342.457	1144.14	262930	262930
343.457	1143.14	263280	263280
344.457	1142.14	264040	264040
345.457	1141.14	262460	262460
346.457	1140.14	264510	264510
347.457	1139.14	264880	264880
348.457	1138.14	264970	264970
349.457	1137.14	267370	267370
350.457	1136.14	268790	268790
351.457	1135.14	269070	269070
352.457	1134.14	269410	269410
353.457	1133.14	270690	270690
354.457	1132.14	269210	269210
355.457	1131.14	269310	269310
356.457	1130.14	269810	269810
357.457	1129.14	270420	270420
358.457	1128.14	266260	266260
359.457	1127.14	265830	265830
360.457	1126.14	267360	267360
361.457	1125.14	264090	264090
362.457	1124.14	261740	261740
363.457	1123.14	261800	261800
364.457	1122.14	260780	260780
365.457	1121.14	259040	259040
366.457	1120.14	259200	259200
367.457	1119.14	259260	259260
368.457	1118.14	261120	261120
369.457	1117.14	263390	263390
370.457	1116.14	267360	267360
371.457	1115.14	274060	274060
372.457	1114.14	283230	283230
373.457	1113.14	301180	301180
374.457	1112.14	322060	322060
375.457	1111.14	323300	323300
376.457	1110.14	312920	312920
377.457	1109.14	289780	289780
378.457	1108.14	267780	267780
379.457	1107.14	263000	263000
380.457	1106.14	274380	274380
381.457	1105.14	280120	280120
382.457	1104.14	262880	262880
383.457	1103.14	241570	241570
384.457	1102.14	226590	226590
385.457	1101.14	219430	219430
386.457	1100.14	216500	216500
387.457	1099.14	214500	214500
388.457	1098.14	213900	213900
389.457	1097.14	212990	212990
390.457	1096.14	212540	212540
391.457	1095.14	212050	212050
392.457	1094.14	213470	213470
393.457	1093.14	210370	210370
394.457	1092.14	212380	212380
395.457	1091.14	210440	210440
396.457	1090.14	210240	210240
397.457	1089.14	207970	207970
398.457	1088.14	208280	208280
399.457	1087.14	209020	209020
400.457	1086.14	208790	208790
401.457	1085.14	207960	207960
402.457	1084.14	208510	208510
403.457	1083.14	209830	209830
404.457	1082.14	208600	208600
405.457	1081.14	209300	209300
406.457	1080.14	210830	210830
407.457	1079.14	209770	209770
408.457	1078.14	209350	209350
409.457	1077.14	209690	209690
410.457	1076.14	210670	210670
411.457	1075.14	208880	208880
412.457	1074.14	208600	208600
413.457	1073.14	209830	209830
414.457	1072.14	212460	212460
415.457	1071.14	210000	210000
416.457	1070.14	209770	209770
417.457	1069.14	211670	211670
418.457	1068.14	211830	211830
419.457	1067.14	214160	214160
420.457	1066.14	213050	213050
421.457	1065.14	212860	212860
422.457	1064.14	213620	213620
423.457	1063.14	213320	213320
424.457	1062.14	210970	210970
425.457	1061.14	211910	211910
426.457	1060.14	212320	212320
427.457	1059.14	213890	213890
428.457	1058.14	213540	213540
429.457	1057.14	214420	214420
430.457	1056.14	214010	214010
431.457	1055.14	215640	215640
432.457	1054.14	215660	215660
433.457	1053.14	213440	213440
434.457	1052.14	216290	216290
435.457	1051.14	215920	215920
436.457	1050.14	217770	217770
437.457	1049.14	215820	215820
438.457	1048.14	216640	216640
439.457	1047.14	217970	217970
440.457	1046.14	218470	218470
441.457	1045.14	218060	218060
442.457	1044.14	218840	218840
443.457	1043.14	217570	217570
444.457	1042.14	218020	218020
445.457	1041.14	218190	218190
446.457	1040.14	217120	217120
447.457	1039.14	218820	218820
448.457	1038.14	216140	216140
449.457	1037.14	217970	217970
450.457	1036.14	217660	217660
451.457	1035.14	219320	219320
452.457	1034.14	218490	218490
453.457	1033.14	218910	218910
454.457	1032.14	221110	221110
455.457	1031.14	219670	219670
456.457	1030.14	220250	220250
457.457	1029.14	220930	220930
458.457	1028.14	220450	220450
459.457	1027.14	219380	219380
460.457	1026.14	222050	222050
461.457	1025.14	222940	222940
462.457	1024.14	221860	221860
463.457	1023.14	220690	220690
464.457	1022.14	222140	222140
465.457	1021.14	222720	222720
466.457	1020.14	223640	223640
467.457	1019.14	223940	223940
468.457	1018.14	225370	225370
469.457	1017.14	224870	224870
470.457	1016.14	222810	222810
471.457	1015.14	226510	226510
472.457	1014.14	228020	228020
473.457	1013.14	226100	226100
474.457	1012.14	224720	224720
475.457	1011.14	224340	224340
476.457	1010.14	224480	224480
477.457	1009.14	225240	225240
478.457	1008.14	223390	223390
479.457	1007.14	223620	223620
480.457	1006.14	226940	226940
481.457	1005.14	224290	224290
482.457	1004.14	226270	226270
483.457	1003.14	227030	227030
484.457	1002.14	228100	228100
485.457	1001.14	227460	227460
486.457	1000.14	228400	228400
487.457	999.143	229340	229340
488.457	998.143	227850	227850
489.457	997.143	226390	226390
490.457	996.143	228370	228370
491.457	995.143	230460	230460
492.457	994.143	230250	230250
493.457	993.143	229240	229240
494.457	992.143	226150	226150
495.457	991.143	223670	223670
496.457	990.143	224430	224430
497.457	989.143	221340	221340
498.457	988.143	223790	223790
499.457	987.143	224730	224730
500.457	986.143	225430	225430
501.457	985.143	228510	228510
502.457	984.143	224780	224780
503.457	983.143	224920	224920
504.457	982.143	225850	225850
505.457	981.143	228730	228730
506.457	980.143	230400	230400
507.457	979.143	228470	228470
508.457	978.143	232060	232060
509.457	977.143	234670	234670
510.457	976.143	236800	236800
511.457	975.143	239340	239340
512.457	974.143	235500	235500
513.457	973.143	231690	231690
514.457	972.143	232310	232310
515.457	971.143	231550	231550
516.457	970.143	231020	231020
517.457	969.143	224400	224400
518.457	968.143	220070	220070
519.457	967.143	221250	221250
520.457	966.143	218930	218930
521.457	965.143	217110	217110
522.457	964.143	216190	216190
523.457	963.143	216520	216520
524.457	962.143	214280	214280
525.457	961.143	214990	214990
526.457	960.143	213760	213760
527.457	959.143	214440	214440
528.457	958.143	216220	216220
529.457	957.143	215820	215820
530.457	956.143	215860	215860
531.457	955.143	218280	218280
532.457	954.143	220030	220030
533.457	953.143	218140	218140
534.457	952.143	216490	216490
535.457	951.143	215330	215330
536.457	950.143	217640	217640
537.457	949.143	215700	215700
538.457	948.143	218720	218720
539.457	947.143	218880	218880
540.457	946.143	216110	216110
541.457	945.143	218960	218960
542.457	944.143	217210	217210
543.457	943.143	217250	217250
544.457	942.143	218390	218390
545.457	941.143	217910	217910
546.457	940.143	219230	219230
547.457	939.143	218170	218170
548.457	938.143	216790	216790
549.457	937.143	217490	217490
550.457	936.143	218310	218310
551.457	935.143	218750	218750
552.457	934.143	218790	218790
553.457	933.143	220520	220520
554.457	932.143	220580	220580
555.457	931.143	219070	219070
556.457	930.143	217610	217610
557.457	929.143	219630	219630
558.457	928.143	218730	218730
559.457	927.143	219840	219840
560.457	926.143	219690	219690
561.457	925.143	220620	220620
562.457	924.143	221400	221400
563.457	923.143	220820	220820
564.457	922.143	221390	221390
565.457	921.143	221550	221550
566.457	920.143	222710	222710
567.457	919.143	222760	222760
568.457	918.143	221950	221950
569.457	917.143	221030	221030
570.457	916.143	221010	221010
571.457	915.143	220670	220670
572.457	914.143	222910	222910
573.457	913.143	223010	223010
574.457	912.143	222030	222030
575.457	911.143	220450	220450
576.457	910.143	221400	221400
577.457	909.143	223780	223780
578.457	908.143	221380	221380
579.457	907.143	224690	224690
580.457	906.143	224430	224430
581.457	905.143	225440	225440
582.457	904.143	224740	224740
583.457	903.143	222760	222760
584.457	902.143	223430	223430
585.457	901.143	225900	225900
586.457	900.143	224960	224960
587.457	899.143	225020	225020
588.457	898.143	223980	223980
589.457	897.143	223410	223410
590.457	896.143	223770	223770
591.457	895.143	226640	226640
592.457	894.143	226100	226100
593.457	893.143	226530	226530
594.457	892.143	226300	226300
595.457	891.143	225460	225460
596.457	890.143	225810	225810
597.457	889.143	225000	225000
598.457	888.143	226860	226860
599.457	887.143	226230	226230
600.457	886.143	227700	227700
601.457	885.143	227330	227330
602.457	884.143	226020	226020
603.457	883.143	227470	227470
604.457	882.143	227330	227330
605.457	881.143	230400	230400
606.457	880.143	229480	229480
607.457	879.143	228440	228440
608.457	878.143	229790	229790
609.457	877.143	227650	227650
610.457	876.143	230610	230610
611.457	875.143	231740	231740
612.457	874.143	231400	231400
613.457	873.143	230490	230490
614.457	872.143	229590	229590
615.457	871.143	228280	228280
616.457	870.143	230340	230340
617.457	869.143	233430	233430
618.457	868.143	231850	231850
619.457	867.143	230680	230680
620.457	866.143	233230	233230
621.457	865.143	228700	228700
622.457	864.143	230830	230830
623.457	863.143	232360	232360
624.457	862.143	231350	231350
625.457	861.143	231540	231540
626.457	860.143	234210	234210
627.457	859.143	232760	232760
628.457	858.143	234690	234690
629.457	857.143	233840	233840
630.457	856.143	235970	235970
631.457	855.143	234320	234320
632.457	854.143	234320	234320
633.457	853.143	233780	233780
634.457	852.143	236320	236320
635.457	851.143	234960	234960
636.457	850.143	235610	235610
637.457	849.143	233890	233890
638.457	848.143	233930	233930
639.457	847.143	235770	235770
640.457	846.143	236390	236390
641.457	845.143	234710	234710
642.457	844.143	235320	235320
643.457	843.143	236280	236280
644.457	842.143	236800	236800
645.457	841.143	235130	235130
646.457	840.143	239110	239110
647.457	839.143	238260	238260
648.457	838.143	239480	239480
649.457	837.143	236850	236850
650.457	836.143	237340	237340
651.457	835.143	235850	235850
652.457	834.143	238860	238860
653.457	833.143	237150	237150
654.457	832.143	236430	236430
655.457	831.143	238770	238770
656.457	830.143	239070	239070
657.457	829.143	242230	242230
658.457	828.143	242750	242750
659.457	827.143	240210	240210
660.457	826.143	241020	241020
661.457	825.143	242090	242090
662.457	824.143	241210	241210
663.457	823.143	242810	242810
664.457	822.143	242050	242050
665.457	821.143	240850	240850
666.457	820.143	242090	242090
667.457	819.143	244170	244170
668.457	818.143	242890	242890
669.457	817.143	242080	242080
670.457	816.143	245480	245480
671.457	815.143	244240	244240
672.457	814.143	243660	243660
673.457	813.143	243730	243730
674.457	812.143	245940	245940
675.457	811.143	244190	244190
676.457	810.143	243680	243680
677.457	809.143	244730	244730
678.457	808.143	244800	244800
679.457	807.143	248040	248040
680.457	806.143	244600	244600
681.457	805.143	247370	247370
682.457	804.143	248110	248110
683.457	803.143	246320	246320
684.457	802.143	247280	247280
685.457	801.143	248150	248150
686.457	800.143	248220	248220
687.457	799.143	248450	248450
688.457	798.143	247100	247100
689.457	797.143	245040	245040
690.457	796.143	247640	247640
691.457	795.143	248530	248530
692.457	794.143	250900	250900
693.457	793.143	252950	252950
694.457	792.143	251020	251020
695.457	791.143	251280	251280
696.457	790.143	248930	248930
697.457	789.143	253800	253800
698.457	788.143	252570	252570
699.457	787.143	250760	250760
700.457	786.143	249910	249910
701.457	785.143	253190	253190
702.457	784.143	250670	250670
703.457	783.143	250760	250760
704.457	782.143	256220	256220
705.457	781.143	252060	252060
706.457	780.143	252320	252320
707.457	779.143	253790	253790
708.457	778.143	251210	251210
709.457	777.143	253840	253840
710.457	776.143	257610	257610
711.457	775.143	258390	258390
712.457	774.143	261170	261170
713.457	773.143	262990	262990
714.457	772.143	264360	264360
715.457	771.143	263540	263540
716.457	770.143	262760	262760
717.457	769.143	262900	262900
718.457	768.143	258710	258710
719.457	767.143	257540	257540
720.457	766.143	255470	255470
721.457	765.143	252660	252660
722.457	764.143	250270	250270
723.457	763.143	253170	253170
724.457	762.143	248750	248750
725.457	761.143	248920	248920
726.457	760.143	248720	248720
727.457	759.143	247360	247360
728.457	758.143	248460	248460
729.457	757.143	248010	248010
730.457	756.143	248990	248990
731.457	755.143	249860	249860
732.457	754.143	249640	249640
733.457	753.143	250150	250150
734.457	752.143	247590	247590
735.457	751.143	249310	249310
736.457	750.143	249990	249990
737.457	749.143	248420	248420
738.457	748.143	249870	249870
739.457	747.143	248530	248530
740.457	746.143	250430	250430
741.457	745.143	253270	253270
742.457	744.143	250910	250910
743.457	743.143	250040	250040
744.457	742.143	248110	248110
745.457	741.143	250040	250040
746.457	740.143	250250	250250
747.457	739.143	251070	251070
748.457	738.143	250720	250720
749.457	737.143	250340	250340
750.457	736.143	253220	253220
751.457	735.143	251140	251140
752.457	734.143	253900	253900
753.457	733.143	254190	254190
754.457	732.143	251140	251140
755.457	731.143	251360	251360
756.457	730.143	252960	252960
757.457	729.143	253470	253470
758.457	728.143	255100	255100
759.457	727.143	252190	252190
760.457	726.143	252620	252620
761.457	725.143	254630	254630
762.457	724.143	256780	256780
763.457	723.143	257950	257950
764.457	722.143	256910	256910
765.457	721.143	254540	254540
766.457	720.143	255230	255230
767.457	719.143	258000	258000
768.457	718.143	255640	255640
769.457	717.143	256710	256710
770.457	716.143	257810	257810
771.457	715.143	256460	256460
772.457	714.143	257550	257550
773.457	713.143	257030	257030
774.457	712.143	259160	259160
775.457	711.143	260370	260370
776.457	710.143	260920	260920
777.457	709.143	261340	261340
778.457	708.143	258410	258410
779.457	707.143	263460	263460
780.457	706.143	261210	261210
781.457	705.143	261430	261430
782.457	704.143	263050	263050
783.457	703.143	259670	259670
784.457	702.143	261890	261890
785.457	701.143	262450	262450
786.457	700.143	258950	258950
787.457	699.143	261500	261500
788.457	698.143	263810	263810
789.457	697.143	261850	261850
790.457	696.143	261720	261720
791.457	695.143	263780	263780
792.457	694.143	264040	264040
793.457	693.143	264590	264590
794.457	692.143	263140	263140
795.457	691.143	264050	264050
796.457	690.143	266970	266970
797.457	689.143	266140	266140
798.457	688.143	263900	263900
799.457	687.143	265480	265480
800.457	686.143	266290	266290
801.457	685.143	266130	266130
802.457	684.143	265690	265690
803.457	683.143	268890	268890
804.457	682.143	267950	267950
805.457	681.143	266970	266970
806.457	680.143	269130	269130
807.457	679.143	269790	269790
808.457	678.143	271340	271340
809.457	677.143	273100	273100
810.457	676.143	274630	274630
811.457	675.143	271820	271820
812.457	674.143	272240	272240
813.457	673.143	275390	275390
814.457	672.143	274740	274740
815.457	671.143	276250	276250
816.457	670.143	274890	274890
817.457	669.143	275080	275080
818.457	668.143	273480	273480
819.457	667.143	275250	275250
820.457	666.143	274110	274110
821.457	665.143	273900	273900
822.457	664.143	271050	271050
823.457	663.143	270490	270490
824.457	662.143	271210	271210
825.457	661.143	269350	269350
826.457	660.143	269490	269490
827.457	659.143	269020	269020
828.457	658.143	269890	269890
829.457	657.143	271510	271510
830.457	656.143	277980	277980
831.457	655.143	285460	285460
832.457	654.143	304470	304470
833.457	653.143	335210	335210
834.457	652.143	345890	345890
835.457	651.143	329810	329810
836.457	650.143	304390	304390
837.457	649.143	282570	282570
838.457	648.143	273470	273470
839.457	647.143	268320	268320
840.457	646.143	264600	264600
841.457	645.143	264780	264780
842.457	644.143	266170	266170
843.457	643.143	267440	267440
844.457	642.143	267860	267860
845.457	641.143	267390	267390
846.457	640.143	266330	266330
847.457	639.143	269850	269850
848.457	638.143	269090	269090
849.457	637.143	268720	268720
850.457	636.143	266860	266860
851.457	635.143	264680	264680
852.457	634.143	264300	264300
853.457	633.143	263460	263460
854.457	632.143	260800	260800
855.457	631.143	259850	259850
856.457	630.143	256540	256540
857.457	629.143	254510	254510
858.457	628.143	253900	253900
859.457	627.143	249470	249470
860.457	626.143	247180	247180
861.457	625.143	251200	251200
862.457	624.143	253120	253120
863.457	623.143	252520	252520
864.457	622.143	261250	261250
865.457	621.143	278550	278550
866.457	620.143	310330	310330
867.457	619.143	360410	360410
868.457	618.143	398730	398730
869.457	617.143	383800	383800
870.457	616.143	328630	328630
871.457	615.143	284690	284690
872.457	614.143	255090	255090
873.457	613.143	241040	241040
874.457	612.143	236230	236230
875.457	611.143	231080	231080
876.457	610.143	227880	227880
877.457	609.143	227290	227290
878.457	608.143	227250	227250
879.457	607.143	223340	223340
880.457	606.143	225860	225860
881.457	605.143	224720	224720
882.457	604.143	223660	223660
883.457	603.143	222730	222730
884.457	602.143	223450	223450
885.457	601.143	225670	225670
886.457	600.143	223640	223640
887.457	599.143	222880	222880
888.457	598.143	224210	224210
889.457	597.143	226540	226540
890.457	596.143	225640	225640
891.457	595.143	226010	226010
892.457	594.143	225570	225570
893.457	593.143	226890	226890
894.457	592.143	226760	226760
895.457	591.143	225930	225930
896.457	590.143	225650	225650
897.457	589.143	229610	229610
898.457	588.143	228200	228200
899.457	587.143	226840	226840
900.457	586.143	225300	225300
901.457	585.143	227870	227870
902.457	584.143	225960	225960
903.457	583.143	226980	226980
904.457	582.143	228380	228380
905.457	581.143	227700	227700
906.457	580.143	228700	228700
907.457	579.143	227950	227950
908.457	578.143	228570	228570
909.457	577.143	229100	229100
910.457	576.143	229110	229110
911.457	575.143	229110	229110
912.457	574.143	232060	232060
913.457	573.143	230350	230350
914.457	572.143	227930	227930
915.457	571.143	229960	229960
916.457	570.143	230870	230870
917.457	569.143	229960	229960
918.457	568.143	230850	230850
919.457	567.143	234580	234580
920.457	566.143	231430	231430
921.457	565.143	230330	230330
922.457	564.143	231240	231240
923.457	563.143	230370	230370
924.457	562.143	228980	228980
925.457	561.143	232440	232440
926.457	560.143	232050	232050
927.457	559.143	233280	233280
928.457	558.143	233350	233350
929.457	557.143	235700	235700
930.457	556.143	235730	235730
931.457	555.143	237030	237030
932.457	554.143	235480	235480
933.457	553.143	234770	234770
934.457	552.143	234980	234980
935.457	551.143	238810	238810
936.457	550.143	235900	235900
937.457	549.143	236990	236990
938.457	548.143	238130	238130
939.457	547.143	236500	236500
940.457	546.143	233650	233650
941.457	545.143	232650	232650
942.457	544.143	232500	232500
943.457	543.143	230520	230520
944.457	542.143	229140	229140
945.457	541.143	230840	230840
946.457	540.143	228060	228060
947.457	539.143	227220	227220
948.457	538.143	225640	225640
949.457	537.143	226880	226880
950.457	536.143	228630	228630
951.457	535.143	228720	228720
952.457	534.143	233630	233630
953.457	533.143	252000	252000
954.457	532.143	307760	307760
955.457	531.143	348960	348960
956.457	530.143	294490	294490
957.457	529.143	239980	239980
958.457	528.143	225450	225450
959.457	527.143	222680	222680
960.457	526.143	224500	224500
961.457	525.143	222430	222430
962.457	524.143	221980	221980
963.457	523.143	222930	222930
964.457	522.143	226350	226350
965.457	521.143	226570	226570
966.457	520.143	221410	221410
967.457	519.143	225770	225770
968.457	518.143	224180	224180
969.457	517.143	224340	224340
970.457	516.143	225100	225100
971.457	515.143	226630	226630
972.457	514.143	227730	227730
973.457	513.143	226390	226390
974.457	512.143	228450	228450
975.457	511.143	228850	228850
976.457	510.143	226500	226500
977.457	509.143	227550	227550
978.457	508.143	228400	228400
979.457	507.143	227730	227730
980.457	506.143	228760	228760
981.457	505.143	229210	229210
982.457	504.143	227850	227850
983.457	503.143	228970	228970
984.457	502.143	232240	232240
985.457	501.143	230050	230050
986.457	500.143	230520	230520
987.457	499.143	231660	231660
988.457	498.143	229820	229820
989.457	497.143	231200	231200
990.457	496.143	231900	231900
991.457	495.143	228890	228890
992.457	494.143	231140	231140
993.457	493.143	231280	231280
994.457	492.143	231380	231380
995.457	491.143	234060	234060
996.457	490.143	234210	234210
997.457	489.143	234940	234940
998.457	488.143	233950	233950
999.457	487.143	231610	231610
1000.46	486.143	231810	231810
1001.46	485.143	232680	232680
1002.46	484.143	232270	232270
1003.46	483.143	236510	236510
1004.46	482.143	234480	234480
1005.46	481.143	234730	234730
1006.46	480.143	236830	236830
1007.46	479.143	237810	237810
1008.46	478.143	237430	237430
1009.46	477.143	236230	236230
1010.46	476.143	236590	236590
1011.46	475.143	236550	236550
1012.46	474.143	238670	238670
1013.46	473.143	238230	238230
1014.46	472.143	242230	242230
1015.46	471.143	240420	240420
1016.46	470.143	237300	237300
1017.46	469.143	240120	240120
1018.46	468.143	240830	240830
1019.46	467.143	241400	241400
1020.46	466.143	239910	239910
1021.46	465.143	240010	240010
1022.46	464.143	242050	242050
1023.46	463.143	243480	243480
1024.46	462.143	247220	247220
1025.46	461.143	246010	246010
1026.46	460.143	245700	245700
1027.46	459.143	245920	245920
1028.46	458.143	245170	245170
1029.46	457.143	245810	245810
1030.46	456.143	247010	247010
1031.46	455.143	246940	246940
1032.46	454.143	249370	249370
1033.46	453.143	248480	248480
1034.46	452.143	250960	250960
1035.46	451.143	249260	249260
1036.46	450.143	249710	249710
1037.46	449.143	252320	252320
1038.46	448.143	250590	250590
1039.46	447.143	250630	250630
1040.46	446.143	250150	250150
1041.46	445.143	250700	250700
1042.46	444.143	251610	251610
1043.46	443.143	251710	251710
1044.46	442.143	251000	251000
1045.46	441.143	251470	251470
1046.46	440.143	254620	254620
1047.46	439.143	256180	256180
1048.46	438.143	258540	258540
1049.46	437.143	260870	260870
1050.46	436.143	259320	259320
1051.46	435.143	262280	262280
1052.46	434.143	266450	266450
1053.46	433.143	267040	267040
1054.46	432.143	268770	268770
1055.46	431.143	270270	270270
1056.46	430.143	275560	275560
1057.46	429.143	273010	273010
1058.46	428.143	270630	270630
1059.46	427.143	268030	268030
1060.46	426.143	265790	265790
1061.46	425.143	262940	262940
1062.46	424.143	260070	260070
1063.46	423.143	255760	255760
1064.46	422.143	247930	247930
1065.46	421.143	242090	242090
1066.46	420.143	236920	236920
1067.46	419.143	226560	226560
1068.46	418.143	220230	220230
1069.46	417.143	213960	213960
1070.46	416.143	211240	211240
1071.46	415.143	207650	207650
1072.46	414.143	221220	221220
1073.46	413.143	337800	337800
1074.46	412.143	580230	580230
1075.46	411.143	544710	544710
1076.46	410.143	297890	297890
1077.46	409.143	185250	185250
1078.46	408.143	171540	171540
1079.46	407.143	212030	212030
1080.46	406.143	456960	456960
1081.46	405.143	771040	771040
1082.46	404.143	601090	601090
1083.46	403.143	258450	258450
1084.46	402.143	147490	147490
1085.46	401.143	134590	134590
1086.46	400.143	132820	132820
1087.46	399.143	127640	127640
1088.46	398.143	125300	125300
1089.46	397.143	125050	125050
1090.46	396.143	124180	124180
1091.46	395.143	123650	123650
1092.46	394.143	123320	123320
1093.46	393.143	125790	125790
1094.46	392.143	125320	125320
1095.46	391.143	125510	125510
1096.46	390.143	126720	126720
1097.46	389.143	126640	126640
1098.46	388.143	126930	126930
1099.46	387.143	124760	124760
1100.46	386.143	124390	124390
1101.46	385.143	122450	122450
1102.46	384.143	122710	122710
1103.46	383.143	122100	122100
1104.46	382.143	122960	122960
1105.46	381.143	120580	120580
1106.46	380.143	121590	121590
1107.46	379.143	121110	121110
1108.46	378.143	121620	121620
1109.46	377.143	122200	122200
1110.46	376.143	119890	119890
1111.46	375.143	122420	122420
1112.46	374.143	122310	122310
1113.46	373.143	122300	122300
1114.46	372.143	122390	122390
1115.46	371.143	121210	121210
1116.46	370.143	121690	121690
1117.46	369.143	121170	121170
1118.46	368.143	122690	122690
1119.46	367.143	123700	123700
1120.46	366.143	124530	124530
1121.46	365.143	124430	124430
1122.46	364.143	124300	124300
1123.46	363.143	124390	124390
1124.46	362.143	123920	123920
1125.46	361.143	125190	125190
1126.46	360.143	125240	125240
1127.46	359.143	128210	128210
1128.46	358.143	125620	125620
1129.46	357.143	126850	126850
1130.46	356.143	125980	125980
1131.46	355.143	126270	126270
1132.46	354.143	127450	127450
1133.46	353.143	126490	126490
1134.46	352.143	124680	124680
1135.46	351.143	125760	125760
1136.46	350.143	127530	127530
1137.46	349.143	124400	124400
1138.46	348.143	123720	123720
1139.46	347.143	125890	125890
1140.46	346.143	125830	125830
1141.46	345.143	124220	124220
1142.46	344.143	125550	125550
1143.46	343.143	125120	125120
1144.46	342.143	122560	122560
1145.46	341.143	125240	125240
1146.46	340.143	126970	126970
1147.46	339.143	126690	126690
1148.46	338.143	126320	126320
1149.46	337.143	125870	125870
1150.46	336.143	126550	126550
1151.46	335.143	126260	126260
1152.46	334.143	129330	129330
1153.46	333.143	127650	127650
1154.46	332.143	126120	126120
1155.46	331.143	127590	127590
1156.46	330.143	127460	127460
1157.46	329.143	128000	128000
1158.46	328.143	128330	128330
1159.46	327.143	126970	126970
1160.46	326.143	129230	129230
1161.46	325.143	130600	130600
1162.46	324.143	128910	128910
1163.46	323.143	128830	128830
1164.46	322.143	128870	128870
1165.46	321.143	131110	131110
1166.46	320.143	131540	131540
1167.46	319.143	132060	132060
1168.46	318.143	131690	131690
1169.46	317.143	131630	131630
1170.46	316.143	131380	131380
1171.46	315.143	131820	131820
1172.46	314.143	132650	132650
1173.46	313.143	133720	133720
1174.46	312.143	133910	133910
1175.46	311.143	132820	132820
1176.46	310.143	134950	134950
1177.46	309.143	135060	135060
1178.46	308.143	133940	133940
1179.46	307.143	133690	133690
1180.46	306.143	134940	134940
1181.46	305.143	134870	134870
1182.46	304.143	134250	134250
1183.46	303.143	132180	132180
1184.46	302.143	132160	132160
1185.46	301.143	130050	130050
1186.46	300.143	128450	128450
1187.46	299.143	127600	127600
1188.46	298.143	126210	126210
1189.46	297.143	125530	125530
1190.46	296.143	121020	121020
1191.46	295.143	115660	115660
1192.46	294.143	110630	110630
1193.46	293.143	106060	106060
1194.46	292.143	103020	103020
1195.46	291.143	103560	103560
1196.46	290.143	106940	106940
1197.46	289.143	120950	120950
1198.46	288.143	135340	135340
1199.46	287.143	136270	136270
1200.46	286.143	187580	187580
1201.46	285.143	350690	350690
1202.46	284.143	378410	378410
1203.46	283.143	220230	220230
1204.46	282.143	113330	113330
1205.46	281.143	92830	92830
1206.46	280.143	88840	88840
1207.46	279.143	86870	86870
1208.46	278.143	85350	85350
1209.46	277.143	84770	84770
1210.46	276.143	83600	83600
1211.46	275.143	82710	82710
1212.46	274.143	82740	82740
1213.46	273.143	82620	82620
1214.46	272.143	81670	81670
1215.46	271.143	82690	82690
1216.46	270.143	82870	82870
1217.46	269.143	83110	83110
1218.46	268.143	84200	84200
1219.46	267.143	83600	83600
1220.46	266.143	83100	83100
1221.46	265.143	83600	83600
1222.46	264.143	82540	82540
1223.46	263.143	83300	83300
1224.46	262.143	83290	83290
1225.46	261.143	82490	82490
1226.46	260.143	84450	84450
1227.46	259.143	84030	84030
1228.46	258.143	85830	85830
1229.46	257.143	89550	89550
1230.46	256.143	92060	92060
1231.46	255.143	90760	90760
1232.46	254.143	90880	90880
1233.46	253.143	88180	88180
1234.46	252.143	85160	85160
1235.46	251.143	83690	83690
1236.46	250.143	85080	85080
1237.46	249.143	84860	84860
1238.46	248.143	87030	87030
1239.46	247.143	85640	85640
1240.46	246.143	85620	85620
1241.46	245.143	85570	85570
1242.46	244.143	84380	84380
1243.46	243.143	83330	83330
1244.46	242.143	82200	82200
1245.46	241.143	83210	83210
1246.46	240.143	82820	82820
1247.46	239.143	82480	82480
1248.46	238.143	81540	81540
1249.46	237.143	80550	80550
1250.46	236.143	81500	81500
1251.46	235.143	79570	79570
1252.46	234.143	80520	80520
1253.46	233.143	80170	80170
1254.46	232.143	81240	81240
1255.46	231.143	81730	81730
1256.46	230.143	83750	83750
1257.46	229.143	87940	87940
1258.46	228.143	90550	90550
1259.46	227.143	93930	93930
1260.46	226.143	101440	101440
1261.46	225.143	100320	100320
1262.46	224.143	89280	89280
1263.46	223.143	82670	82670
1264.46	222.143	80500	80500
1265.46	221.143	78390	78390
1266.46	220.143	79050	79050
1267.46	219.143	77550	77550
1268.46	218.143	77980	77980
1269.46	217.143	76670	76670
1270.46	216.143	77160	77160
1271.46	215.143	77190	77190
1272.46	214.143	76250	76250
1273.46	213.143	76010	76010
1274.46	212.143	77340	77340
1275.46	211.143	77770	77770
1276.46	210.143	79270	79270
1277.46	209.143	79520	79520
1278.46	208.143	79170	79170
1279.46	207.143	79050	79050
1280.46	206.143	79180	79180
1281.46	205.143	81030	81030
1282.46	204.143	80620	80620
1283.46	203.143	80370	80370
1284.46	202.143	80830	80830
1285.46	201.143	82190	82190
1286.46	200.143	82320	82320
1287.46	199.143	81960	81960
1288.46	198.143	81880	81880
1289.46	197.143	81960	81960
1290.46	196.143	80900	80900
1291.46	195.143	80230	80230
1292.46	194.143	79970	79970
1293.46	193.143	78140	78140
1294.46	192.143	80170	80170
1295.46	191.143	78490	78490
1296.46	190.143	77570	77570
1297.46	189.143	77210	77210
1298.46	188.143	78390	78390
1299.46	187.143	79090	79090
1300.46	186.143	79060	79060
1301.46	185.143	80610	80610
1302.46	184.143	82870	82870
1303.46	183.143	84680	84680
1304.46	182.143	89090	89090
1305.46	181.143	103450	103450
1306.46	180.143	118820	118820
1307.46	179.143	118950	118950
1308.46	178.143	103410	103410
1309.46	177.143	91550	91550
1310.46	176.143	86340	86340
1311.46	175.143	85230	85230
1312.46	174.143	79370	79370
1313.46	173.143	72710	72710
1314.46	172.143	66890	66890
1315.46	171.143	62650	62650
1316.46	170.143	61190	61190
1317.46	169.143	60040	60040
1318.46	168.143	60500	60500
1319.46	167.143	62570	62570
1320.46	166.143	64790	64790
1321.46	165.143	64800	64800
1322.46	164.143	66020	66020
1323.46	163.143	80090	80090
1324.46	162.143	98820	98820
1325.46	161.143	101950	101950
1326.46	160.143	86140	86140
1327.46	159.143	69610	69610
1328.46	158.143	59740	59740
1329.46	157.143	55500	55500
1330.46	156.143	52070	52070
1331.46	155.143	51230	51230
1332.46	154.143	51180	51180
1333.46	153.143	50320	50320
1334.46	152.143	50380	50380
1335.46	151.143	49050	49050
1336.46	150.143	48560	48560
1337.46	149.143	47920	47920
1338.46	148.143	47980	47980
1339.46	147.143	47540	47540
1340.46	146.143	48550	48550
1341.46	145.143	48270	48270
1342.46	144.143	49910	49910
1343.46	143.143	47230	47230
1344.46	142.143	47010	47010
1345.46	141.143	50860	50860
1346.46	140.143	59900	59900
1347.46	139.143	74680	74680
1348.46	138.143	77390	77390
1349.46	137.143	68280	68280
1350.46	136.143	57460	57460
1351.46	135.143	53470	53470
1352.46	134.143	51390	51390
1353.46	133.143	48910	48910
1354.46	132.143	45860	45860
1355.46	131.143	43790	43790
1356.46	130.143	43360	43360
1357.46	129.143	43270	43270
1358.46	128.143	42050	42050
1359.46	127.143	41810	41810
1360.46	126.143	41960	41960
1361.46	125.143	42550	42550
1362.46	124.143	43020	43020
1363.46	123.143	42190	42190
1364.46	122.143	41840	41840
1365.46	121.143	42540	42540
1366.46	120.143	42350	42350
1367.46	119.143	42600	42600
1368.46	118.143	42520	42520
1369.46	117.143	44130	44130
1370.46	116.143	43890	43890
1371.46	115.143	45060	45060
1372.46	114.143	44720	44720
1373.46	113.143	46640	46640
1374.46	112.143	48190	48190
1375.46	111.143	49300	49300
1376.46	110.143	50870	50870
1377.46	109.143	52030	52030
1378.46	108.143	50100	50100
1379.46	107.143	46980	46980
1380.46	106.143	44720	44720
1381.46	105.143	42330	42330
1382.46	104.143	42140	42140
1383.46	103.143	41510	41510
1384.46	102.143	41620	41620
1385.46	101.143	40610	40610
1386.46	100.143	40230	40230
1387.46	99.143	39990	39990
1388.46	98.143	40730	40730
1389.46	97.143	41970	41970
1390.46	96.143	40050	40050
1391.46	95.143	41390	41390
1392.46	94.143	41600	41600
1393.46	93.143	41830	41830
1394.46	92.143	41590	41590
1395.46	91.143	41620	41620
1396.46	90.143	41380	41380
1397.46	89.143	42020	42020
1398.46	88.143	41270	41270
1399.46	87.143	41090	41090
1400.46	86.143	40890	40890
1401.46	85.143	41050	41050
1402.46	84.143	41010	41010
1403.46	83.143	41220	41220
1404.46	82.143	41930	41930
1405.46	81.143	42570	42570
1406.46	80.143	41970	41970
1407.46	79.143	43320	43320
1408.46	78.143	44480	44480
1409.46	77.143	43620	43620
1410.46	76.143	45880	45880
1411.46	75.143	47060	47060
1412.46	74.143	48880	48880
1413.46	73.143	49050	49050
1414.46	72.143	47520	47520
1415.46	71.143	49300	49300
1416.46	70.143	50910	50910
1417.46	69.143	50700	50700
1418.46	68.143	50060	50060
1419.46	67.143	49550	49550
1420.46	66.143	47690	47690
1421.46	65.143	43480	43480
1422.46	64.143	39630	39630
1423.46	63.143	36190	36190
1424.46	62.143	33220	33220
1425.46	61.143	31060	31060
1426.46	60.143	29930	29930
1427.46	59.143	27070	27070
1428.46	58.143	25560	25560
1429.46	57.143	25410	25410
1430.46	56.143	28030	28030
1431.46	55.143	36780	36780
1432.46	54.143	44120	44120
1433.46	53.143	36740	36740
1434.46	52.143	26430	26430
1435.46	51.143	23490	23490
1436.46	50.143	23090	23090
1437.46	49.143	21910	21910
1438.46	48.143	21780	21780
1439.46	47.143	21650	21650
1440.46	46.143	21510	21510
1441.46	45.143	22380	22380
1442.46	44.143	22060	22060
1443.46	43.143	22110	22110
1444.46	42.143	22560	22560
1445.46	41.143	23130	23130
1446.46	40.143	22500	22500
1447.46	39.143	23280	23280
1448.46	38.143	22890	22890
1449.46	37.143	23390	23390
1450.46	36.143	24560	24560
1451.46	35.143	24800	24800
1452.46	34.143	25620	25620
1453.46	33.143	25650	25650
1454.46	32.143	25610	25610
1455.46	31.143	25590	25590
1456.46	30.143	25910	25910
1457.46	29.143	25450	25450
1458.46	28.143	25710	25710
1459.46	27.143	24790	24790
1460.46	26.143	23990	23990
1461.46	25.143	22720	22720
1462.46	24.143	22180	22180
1463.46	23.143	20010	20010
1464.46	22.143	20060	20060
1465.46	21.143	18310	18310
1466.46	20.143	18280	18280
1467.46	19.143	18560	18560
1468.46	18.143	17480	17480
1469.46	17.143	16580	16580
1470.46	16.143	15470	15470
1471.46	15.143	16690	16690
1472.46	14.143	19750	19750
1473.46	13.143	36570	36570
1474.46	12.143	90030	90030
1475.46	11.143	132750	132750
1476.46	10.143	91780	91780
1477.46	9.143	33400	33400
1478.46	8.143	10430	10430
1479.46	7.143	6050	6050
1480.46	6.143	6850	6850
1481.46	5.143	8700	8700
1482.46	4.143	10680	10680
1483.46	3.143	10900	10900
1484.46	2.143	7640	7640
1485.46	1.143	2790	2790
1486.46	0.143	720	720
1487.46	-0.857	250	250
1488.46	-1.857	150	150
1489.46	-2.857	100	100
1490.46	-3.857	110	110
1491.46	-4.857	80	80
1492.46	-5.857	80	80

## Sheet: Foglio2
Figure S3
x-axis		y-axis
--	BE_He I/8	CPS_He I/8	Background_He I/8	Normalised_Residual_He I/8	Residual_He I/8			Characteristic Energy eV	21.21
0.6549	20.7051	70	70	0	0
0.6799	20.6801	40	40	0	0			Acquisition Time s	0.1
0.7049	20.6551	50	50	0	0
0.7299	20.6301	80	80	0	0
0.7549	20.6051	50	50	0	0
0.7799	20.5801	80	80	0	0
0.8049	20.5551	70	70	0	0
0.8299	20.5301	20	20	0	0
0.8549	20.5051	50	50	0	0
0.8799	20.4801	90	90	0	0
0.9049	20.4551	60	60	0	0
0.9299	20.4301	120	120	0	0
0.9549	20.4051	60	60	0	0
0.9799	20.3801	110	110	0	0
1.0049	20.3551	90	90	0	0
1.0299	20.3301	80	80	0	0
1.0549	20.3051	50	50	0	0
1.0799	20.2801	70	70	0	0
1.1049	20.2551	70	70	0	0
1.1299	20.2301	50	50	0	0
1.1549	20.2051	80	80	0	0
1.1799	20.1801	140	140	0	0
1.2049	20.1551	120	120	0	0
1.2299	20.1301	40	40	0	0
1.2549	20.1051	80	80	0	0
1.2799	20.0801	90	90	0	0
1.3049	20.0551	130	130	0	0
1.3299	20.0301	60	60	0	0
1.3549	20.0051	80	80	0	0
1.3799	19.9801	120	120	0	0
1.4049	19.9551	180	180	0	0
1.4299	19.9301	200	200	0	0
1.4549	19.9051	110	110	0	0
1.4799	19.8801	150	150	0	0
1.5049	19.8551	70	70	0	0
1.5299	19.8301	60	60	0	0
1.5549	19.8051	120	120	0	0
1.5799	19.7801	190	190	0	0
1.6049	19.7551	180	180	0	0
1.6299	19.7301	120	120	0	0
1.6549	19.7051	60	60	0	0
1.6799	19.6801	170	170	0	0
1.7049	19.6551	140	140	0	0
1.7299	19.6301	110	110	0	0
1.7549	19.6051	170	170	0	0
1.7799	19.5801	130	130	0	0
1.8049	19.5551	100	100	0	0
1.8299	19.5301	80	80	0	0
1.8549	19.5051	90	90	0	0
1.8799	19.4801	130	130	0	0
1.9049	19.4551	80	80	0	0
1.9299	19.4301	130	130	0	0
1.9549	19.4051	110	110	0	0
1.9799	19.3801	90	90	0	0
2.0049	19.3551	150	150	0	0
2.0299	19.3301	110	110	0	0
2.0549	19.3051	110	110	0	0
2.0799	19.2801	140	140	0	0
2.1049	19.2551	160	160	0	0
2.1299	19.2301	120	120	0	0
2.1549	19.2051	180	180	0	0
2.1799	19.1801	160	160	0	0
2.2049	19.1551	150	150	0	0
2.2299	19.1301	140	140	0	0
2.2549	19.1051	120	120	0	0
2.2799	19.0801	170	170	0	0
2.3049	19.0551	130	130	0	0
2.3299	19.0301	110	110	0	0
2.3549	19.0051	150	150	0	0
2.3799	18.9801	160	160	0	0
2.4049	18.9551	180	180	0	0
2.4299	18.9301	130	130	0	0
2.4549	18.9051	100	100	0	0
2.4799	18.8801	180	180	0	0
2.5049	18.8551	120	120	0	0
2.5299	18.8301	200	200	0	0
2.5549	18.8051	160	160	0	0
2.5799	18.7801	150	150	0	0
2.6049	18.7551	160	160	0	0
2.6299	18.7301	210	210	0	0
2.6549	18.7051	160	160	0	0
2.6799	18.6801	190	190	0	0
2.7049	18.6551	200	200	0	0
2.7299	18.6301	220	220	0	0
2.7549	18.6051	280	1122.23	15.9167	84.2235
2.7799	18.5801	210	1122.23	19.9066	91.2235
2.8049	18.5551	200	1122.23	20.6218	92.2235
2.8299	18.5301	220	1122.23	19.2357	90.2235
2.8549	18.5051	280	1122.23	15.9167	84.2235
2.8799	18.4801	280	1122.23	15.9167	84.2235
2.9049	18.4551	310	1122.23	14.5882	81.2235
2.9299	18.4301	330	1122.23	13.791	79.2235
2.9549	18.4051	320	1122.23	14.1816	80.2235
2.9799	18.3801	240	1122.23	18.0085	88.2235
3.0049	18.3551	280	1122.23	15.9167	84.2235
3.0299	18.3301	320	1122.23	14.1816	80.2235
3.0549	18.3051	490	1122.23	9.03192	63.2235
3.0799	18.2801	440	1122.23	10.2851	68.2235
3.1049	18.2551	510	1122.23	8.573	61.2235
3.1299	18.2301	410	1122.23	11.1232	71.2235
3.1549	18.2051	460	1122.23	9.76412	66.2235
3.1799	18.1801	500	1122.23	8.79973	62.2235
3.2049	18.1551	640	1122.23	6.02793	48.2235
3.2299	18.1301	660	1122.23	5.68972	46.2235
3.2549	18.1051	570	1122.23	7.31453	55.2235
3.2799	18.0801	650	1122.23	5.85735	47.2235
3.3049	18.0551	670	1122.23	5.52493	45.2235
3.3299	18.0301	930	1122.23	1.99338	19.2235
3.3549	18.0051	910	1122.24	2.22483	21.2235
3.3799	17.9801	1050	1122.24	0.70495	7.22361
3.4049	17.9551	1160	1122.24	-0.35061	-3.77616
3.4299	17.9301	1090	1122.24	0.30884	3.22442
3.4549	17.9051	1300	1122.26	-1.55889	-17.7741
3.4799	17.8801	1240	1122.29	-1.05703	-11.7706
3.5049	17.8551	1490	1122.38	-3.0117	-36.7625
3.5299	17.8301	1430	1122.56	-2.57096	-30.7442
3.5549	17.8051	1480	1122.96	-2.93482	-35.7037
3.5799	17.7801	1690	1123.83	-4.35516	-56.6171
3.6049	17.7551	1860	1125.63	-5.38469	-73.4374
3.6299	17.7301	1730	1129.2	-4.56777	-60.0796
3.6549	17.7051	1850	1136.24	-5.24764	-71.3756
3.6799	17.6801	2030	1149.61	-6.17911	-88.0388
3.7049	17.6551	2420	1174.25	-8.00797	-124.575
3.7299	17.6301	2620	1218.34	-8.65947	-140.166
3.7549	17.6051	2600	1294.12	-8.09873	-130.588
3.7799	17.5801	2740	1422.71	-7.95801	-131.729
3.8049	17.5551	2750	1633.26	-6.73422	-111.674
3.8299	17.5301	3580	1967.87	-8.52036	-161.213
3.8549	17.5051	3880	2478.97	-7.11267	-140.103
3.8799	17.4801	4570	3249.69	-6.17616	-132.031
3.9049	17.4551	6060	4370.48	-6.86321	-168.952
3.9299	17.4301	7400	5952.67	-5.32051	-144.733
3.9549	17.4051	9590	8100.33	-4.81039	-148.967
3.9799	17.3801	11760	10978.2	-2.2798	-78.1809
4.0049	17.3551	14650	14695.4	0.11866	4.54179
4.0299	17.3301	18650	19356.3	1.6356	70.6344
4.0549	17.3051	22840	25029.6	4.58151	218.956
4.0799	17.2801	29620	31673.8	3.77373	205.383
4.1049	17.2551	37890	39354.9	2.37976	146.486
4.1299	17.2301	48780	47909.3	-1.2466	-87.0658
4.1549	17.2051	58860	57157.9	-2.21862	-170.213
4.1799	17.1801	66900	66783.5	-0.14244	-11.6501
4.2049	17.1551	71900	71900	0	0
4.2299	17.1301	75410	75410	0	0
4.2549	17.1051	79280	79280	0	0
4.2799	17.0801	80060	80060	0	0
4.3049	17.0551	82220	82220	0	0
4.3299	17.0301	85070	85070	0	0
4.3549	17.0051	85030	85030	0	0
4.3799	16.9801	85140	85140	0	0
4.4049	16.9551	86980	86980	0	0
4.4299	16.9301	87710	87710	0	0
4.4549	16.9051	88940	88940	0	0
4.4799	16.8801	89270	89270	0	0
4.5049	16.8551	89230	89230	0	0
4.5299	16.8301	89620	89620	0	0
4.5549	16.8051	89560	89560	0	0
4.5799	16.7801	89050	89050	0	0
4.6049	16.7551	87610	87610	0	0
4.6299	16.7301	87510	87510	0	0
4.6549	16.7051	87340	87340	0	0
4.6799	16.6801	86210	86210	0	0
4.7049	16.6551	85540	85540	0	0
4.7299	16.6301	85400	85400	0	0
4.7549	16.6051	83990	83990	0	0
4.7799	16.5801	82170	82170	0	0
4.8049	16.5551	80930	80930	0	0
4.8299	16.5301	81040	81040	0	0
4.8549	16.5051	79200	79200	0	0
4.8799	16.4801	76380	76380	0	0
4.9049	16.4551	75360	75360	0	0
4.9299	16.4301	75750	75750	0	0
4.9549	16.4051	73990	73990	0	0
4.9799	16.3801	72460	72460	0	0
5.0049	16.3551	70290	70290	0	0
5.0299	16.3301	68730	68730	0	0
5.0549	16.3051	67750	67750	0	0
5.0799	16.2801	67160	67160	0	0
5.1049	16.2551	65040	65040	0	0
5.1299	16.2301	65250	65250	0	0
5.1549	16.2051	64570	64570	0	0
5.1799	16.1801	63720	63720	0	0
5.2049	16.1551	64150	64150	0	0
5.2299	16.1301	62070	62070	0	0
5.2549	16.1051	60730	60730	0	0
5.2799	16.0801	59730	59730	0	0
5.3049	16.0551	58670	58670	0	0
5.3299	16.0301	57760	57760	0	0
5.3549	16.0051	56990	56990	0	0
5.3799	15.9801	56710	56710	0	0
5.4049	15.9551	55840	55840	0	0
5.4299	15.9301	55140	55140	0	0
5.4549	15.9051	53880	53880	0	0
5.4799	15.8801	53510	53510	0	0
5.5049	15.8551	53210	53210	0	0
5.5299	15.8301	52330	52330	0	0
5.5549	15.8051	51500	51500	0	0
5.5799	15.7801	52330	52330	0	0
5.6049	15.7551	51940	51940	0	0
5.6299	15.7301	50070	50070	0	0
5.6549	15.7051	49340	49340	0	0
5.6799	15.6801	49310	49310	0	0
5.7049	15.6551	48110	48110	0	0
5.7299	15.6301	48210	48210	0	0
5.7549	15.6051	46380	46380	0	0
5.7799	15.5801	46200	46200	0	0
5.8049	15.5551	47020	47020	0	0
5.8299	15.5301	46130	46130	0	0
5.8549	15.5051	44760	44760	0	0
5.8799	15.4801	42980	42980	0	0
5.9049	15.4551	42600	42600	0	0
5.9299	15.4301	42760	42760	0	0
5.9549	15.4051	40970	40970	0	0
5.9799	15.3801	40530	40530	0	0
6.0049	15.3551	40170	40170	0	0
6.0299	15.3301	40300	40300	0	0
6.0549	15.3051	40190	40190	0	0
6.0799	15.2801	39390	39390	0	0
6.1049	15.2551	37600	37600	0	0
6.1299	15.2301	36970	36970	0	0
6.1549	15.2051	36720	36720	0	0
6.1799	15.1801	36530	36530	0	0
6.2049	15.1551	35490	35490	0	0
6.2299	15.1301	34090	34090	0	0
6.2549	15.1051	33220	33220	0	0
6.2799	15.0801	33420	33420	0	0
6.3049	15.0551	32820	32820	0	0
6.3299	15.0301	33360	33360	0	0
6.3549	15.0051	32700	32700	0	0
6.3799	14.9801	31390	31390	0	0
6.4049	14.9551	31240	31240	0	0
6.4299	14.9301	29810	29810	0	0
6.4549	14.9051	29410	29410	0	0
6.4799	14.8801	29290	29290	0	0
6.5049	14.8551	28910	28910	0	0
6.5299	14.8301	28880	28880	0	0
6.5549	14.8051	27730	27730	0	0
6.5799	14.7801	27740	27740	0	0
6.6049	14.7551	27180	27180	0	0
6.6299	14.7301	26790	26790	0	0
6.6549	14.7051	25850	25850	0	0
6.6799	14.6801	26040	26040	0	0
6.7049	14.6551	24910	24910	0	0
6.7299	14.6301	23910	23910	0	0
6.7549	14.6051	24360	24360	0	0
6.7799	14.5801	24040	24040	0	0
6.8049	14.5551	23390	23390	0	0
6.8299	14.5301	23780	23780	0	0
6.8549	14.5051	23100	23100	0	0
6.8799	14.4801	22170	22170	0	0
6.9049	14.4551	21820	21820	0	0
6.9299	14.4301	22140	22140	0	0
6.9549	14.4051	21930	21930	0	0
6.9799	14.3801	21640	21640	0	0
7.0049	14.3551	21110	21110	0	0
7.0299	14.3301	20400	20400	0	0
7.0549	14.3051	19200	19200	0	0
7.0799	14.2801	19670	19670	0	0
7.1049	14.2551	19700	19700	0	0
7.1299	14.2301	19100	19100	0	0
7.1549	14.2051	19210	19210	0	0
7.1799	14.1801	18630	18630	0	0
7.2049	14.1551	17750	17750	0	0
7.2299	14.1301	18140	18140	0	0
7.2549	14.1051	17830	17830	0	0
7.2799	14.0801	17810	17810	0	0
7.3049	14.0551	17620	17620	0	0
7.3299	14.0301	17460	17460	0	0
7.3549	14.0051	18170	18170	0	0
7.3799	13.9801	17470	17470	0	0
7.4049	13.9551	16790	16790	0	0
7.4299	13.9301	17290	17290	0	0
7.4549	13.9051	17040	17040	0	0
7.4799	13.8801	16610	16610	0	0
7.5049	13.8551	17220	17220	0	0
7.5299	13.8301	17070	17070	0	0
7.5549	13.8051	16320	16320	0	0
7.5799	13.7801	15870	15870	0	0
7.6049	13.7551	15350	15350	0	0
7.6299	13.7301	15900	15900	0	0
7.6549	13.7051	15250	15250	0	0
7.6799	13.6801	15150	15150	0	0
7.7049	13.6551	15450	15450	0	0
7.7299	13.6301	15140	15140	0	0
7.7549	13.6051	15420	15420	0	0
7.7799	13.5801	14650	14650	0	0
7.8049	13.5551	14150	14150	0	0
7.8299	13.5301	14250	14250	0	0
7.8549	13.5051	14840	14840	0	0
7.8799	13.4801	14750	14750	0	0
7.9049	13.4551	14470	14470	0	0
7.9299	13.4301	14550	14550	0	0
7.9549	13.4051	14100	14100	0	0
7.9799	13.3801	14000	14000	0	0
8.0049	13.3551	14120	14120	0	0
8.0299	13.3301	14050	14050	0	0
8.0549	13.3051	13310	13310	0	0
8.0799	13.2801	13730	13730	0	0
8.1049	13.2551	14010	14010	0	0
8.1299	13.2301	13760	13760	0	0
8.1549	13.2051	13880	13880	0	0
8.1799	13.1801	13510	13510	0	0
8.2049	13.1551	13860	13860	0	0
8.2299	13.1301	13650	13650	0	0
8.2549	13.1051	13750	13750	0	0
8.2799	13.0801	13650	13650	0	0
8.3049	13.0551	13270	13270	0	0
8.3299	13.0301	13430	13430	0	0
8.3549	13.0051	13660	13660	0	0
8.3799	12.9801	13290	13290	0	0
8.4049	12.9551	13440	13440	0	0
8.4299	12.9301	14380	14380	0	0
8.4549	12.9051	13850	13850	0	0
8.4799	12.8801	14120	14120	0	0
8.5049	12.8551	14190	14190	0	0
8.5299	12.8301	14060	14060	0	0
8.5549	12.8051	14590	14590	0	0
8.5799	12.7801	14300	14300	0	0
8.6049	12.7551	14280	14280	0	0
8.6299	12.7301	14400	14400	0	0
8.6549	12.7051	14960	14960	0	0
8.6799	12.6801	14560	14560	0	0
8.7049	12.6551	14610	14610	0	0
8.7299	12.6301	14800	14800	0	0
8.7549	12.6051	14010	14010	0	0
8.7799	12.5801	14720	14720	0	0
8.8049	12.5551	14820	14820	0	0
8.8299	12.5301	15250	15250	0	0
8.8549	12.5051	15360	15360	0	0
8.8799	12.4801	14840	14840	0	0
8.9049	12.4551	15260	15260	0	0
8.9299	12.4301	15850	15850	0	0
8.9549	12.4051	15740	15740	0	0
8.9799	12.3801	15420	15420	0	0
9.0049	12.3551	16030	16030	0	0
9.0299	12.3301	15920	15920	0	0
9.0549	12.3051	16440	16440	0	0
9.0799	12.2801	16280	16280	0	0
9.1049	12.2551	16160	16160	0	0
9.1299	12.2301	16170	16170	0	0
9.1549	12.2051	16890	16890	0	0
9.1799	12.1801	16480	16480	0	0
9.2049	12.1551	16670	16670	0	0
9.2299	12.1301	17140	17140	0	0
9.2549	12.1051	16840	16840	0	0
9.2799	12.0801	16980	16980	0	0
9.3049	12.0551	17110	17110	0	0
9.3299	12.0301	16970	16970	0	0
9.3549	12.0051	16720	16720	0	0
9.3799	11.9801	17170	17170	0	0
9.4049	11.9551	17260	17260	0	0
9.4299	11.9301	17850	17850	0	0
9.4549	11.9051	17240	17240	0	0
9.4799	11.8801	17830	17830	0	0
9.5049	11.8551	17570	17570	0	0
9.5299	11.8301	18250	18250	0	0
9.5549	11.8051	18330	18330	0	0
9.5799	11.7801	17810	17810	0	0
9.6049	11.7551	18330	18330	0	0
9.6299	11.7301	18780	18780	0	0
9.6549	11.7051	18230	18230	0	0
9.6799	11.6801	18980	18980	0	0
9.7049	11.6551	18880	18880	0	0
9.7299	11.6301	18780	18780	0	0
9.7549	11.6051	18670	18670	0	0
9.7799	11.5801	18700	18700	0	0
9.8049	11.5551	19000	19000	0	0
9.8299	11.5301	19370	19370	0	0
9.8549	11.5051	18890	18890	0	0
9.8799	11.4801	19810	19810	0	0
9.9049	11.4551	19830	19830	0	0
9.9299	11.4301	19900	19900	0	0
9.9549	11.4051	19620	19620	0	0
9.9799	11.3801	20150	20150	0	0
10.0049	11.3551	20000	20000	0	0
10.0299	11.3301	20850	20850	0	0
10.0549	11.3051	20810	20810	0	0
10.0799	11.2801	20680	20680	0	0
10.1049	11.2551	20600	20600	0	0
10.1299	11.2301	20600	20600	0	0
10.1549	11.2051	20950	20950	0	0
10.1799	11.1801	21420	21420	0	0
10.2049	11.1551	21450	21450	0	0
10.2299	11.1301	21210	21210	0	0
10.2549	11.1051	22060	22060	0	0
10.2799	11.0801	22290	22290	0	0
10.3049	11.0551	22730	22730	0	0
10.3299	11.0301	22190	22190	0	0
10.3549	11.0051	23650	23650	0	0
10.3799	10.9801	23610	23610	0	0
10.4049	10.9551	23830	23830	0	0
10.4299	10.9301	25000	25000	0	0
10.4549	10.9051	23800	23800	0	0
10.4799	10.8801	24670	24670	0	0
10.5049	10.8551	24840	24840	0	0
10.5299	10.8301	24660	24660	0	0
10.5549	10.8051	24610	24610	0	0
10.5799	10.7801	25330	25330	0	0
10.6049	10.7551	25350	25350	0	0
10.6299	10.7301	26480	26480	0	0
10.6549	10.7051	27260	27260	0	0
10.6799	10.6801	27250	27250	0	0
10.7049	10.6551	27330	27330	0	0
10.7299	10.6301	27970	27970	0	0
10.7549	10.6051	28220	28220	0	0
10.7799	10.5801	28780	28780	0	0
10.8049	10.5551	29310	29310	0	0
10.8299	10.5301	29390	29390	0	0
10.8549	10.5051	29460	29460	0	0
10.8799	10.4801	30700	30700	0	0
10.9049	10.4551	30440	30440	0	0
10.9299	10.4301	30520	30520	0	0
10.9549	10.4051	31460	31460	0	0
10.9799	10.3801	31710	31710	0	0
11.0049	10.3551	32000	32000	0	0
11.0299	10.3301	32750	32750	0	0
11.0549	10.3051	32840	32840	0	0
11.0799	10.2801	32750	32750	0	0
11.1049	10.2551	34320	34320	0	0
11.1299	10.2301	34670	34670	0	0
11.1549	10.2051	34830	34830	0	0
11.1799	10.1801	34510	34510	0	0
11.2049	10.1551	34440	34440	0	0
11.2299	10.1301	34550	34550	0	0
11.2549	10.1051	35130	35130	0	0
11.2799	10.0801	36110	36110	0	0
11.3049	10.0551	35670	35670	0	0
11.3299	10.0301	36040	36040	0	0
11.3549	10.0051	37020	37020	0	0
11.3799	9.9801	37960	37960	0	0
11.4049	9.9551	38910	38910	0	0
11.4299	9.9301	38840	38840	0	0
11.4549	9.9051	39080	39080	0	0
11.4799	9.8801	39120	39120	0	0
11.5049	9.8551	39960	39960	0	0
11.5299	9.8301	41260	41260	0	0
11.5549	9.8051	40850	40850	0	0
11.5799	9.7801	41240	41240	0	0
11.6049	9.7551	41060	41060	0	0
11.6299	9.7301	40600	40600	0	0
11.6549	9.7051	42140	42140	0	0
11.6799	9.6801	43090	43090	0	0
11.7049	9.6551	43350	43350	0	0
11.7299	9.6301	43130	43130	0	0
11.7549	9.6051	43660	43660	0	0
11.7799	9.5801	44360	44360	0	0
11.8049	9.5551	44060	44060	0	0
11.8299	9.5301	44070	44070	0	0
11.8549	9.5051	44690	44690	0	0
11.8799	9.4801	46100	46100	0	0
11.9049	9.4551	46870	46870	0	0
11.9299	9.4301	45770	45770	0	0
11.9549	9.4051	47300	47300	0	0
11.9799	9.3801	47900	47900	0	0
12.0049	9.3551	48030	48030	0	0
12.0299	9.3301	49390	49390	0	0
12.0549	9.3051	49970	49970	0	0
12.0799	9.2801	51190	51190	0	0
12.1049	9.2551	51160	51160	0	0
12.1299	9.2301	52430	52430	0	0
12.1549	9.2051	52690	52690	0	0
12.1799	9.1801	53710	53710	0	0
12.2049	9.1551	53030	53030	0	0
12.2299	9.1301	53790	53790	0	0
12.2549	9.1051	54860	54860	0	0
12.2799	9.0801	54660	54660	0	0
12.3049	9.0551	57430	57430	0	0
12.3299	9.0301	56930	56930	0	0
12.3549	9.0051	58570	58570	0	0
12.3799	8.9801	59420	59420	0	0
12.4049	8.9551	60060	60060	0	0
12.4299	8.9301	60100	60100	0	0
12.4549	8.9051	60870	60870	0	0
12.4799	8.8801	61680	61680	0	0
12.5049	8.8551	62420	62420	0	0
12.5299	8.8301	63990	63990	0	0
12.5549	8.8051	64130	64130	0	0
12.5799	8.7801	64390	64390	0	0
12.6049	8.7551	64270	64270	0	0
12.6299	8.7301	65890	65890	0	0
12.6549	8.7051	67650	67650	0	0
12.6799	8.6801	68430	68430	0	0
12.7049	8.6551	67950	67950	0	0
12.7299	8.6301	69740	69740	0	0
12.7549	8.6051	70860	70860	0	0
12.7799	8.5801	70840	70840	0	0
12.8049	8.5551	71510	71510	0	0
12.8299	8.5301	71520	71520	0	0
12.8549	8.5051	71930	71930	0	0
12.8799	8.4801	74210	74210	0	0
12.9049	8.4551	72570	72570	0	0
12.9299	8.4301	74650	74650	0	0
12.9549	8.4051	74820	74820	0	0
12.9799	8.3801	75070	75070	0	0
13.0049	8.3551	76630	76630	0	0
13.0299	8.3301	77270	77270	0	0
13.0549	8.3051	78280	78280	0	0
13.0799	8.2801	80350	80350	0	0
13.1049	8.2551	80330	80330	0	0
13.1299	8.2301	80090	80090	0	0
13.1549	8.2051	79050	79050	0	0
13.1799	8.1801	80770	80770	0	0
13.2049	8.1551	80420	80420	0	0
13.2299	8.1301	81790	81790	0	0
13.2549	8.1051	82530	82530	0	0
13.2799	8.0801	82840	82840	0	0
13.3049	8.0551	84710	84710	0	0
13.3299	8.0301	83820	83820	0	0
13.3549	8.0051	84760	84760	0	0
13.3799	7.9801	85040	85040	0	0
13.4049	7.9551	86580	86580	0	0
13.4299	7.9301	88080	88080	0	0
13.4549	7.9051	87630	87630	0	0
13.4799	7.8801	88020	88020	0	0
13.5049	7.8551	87930	87930	0	0
13.5299	7.8301	89120	89120	0	0
13.5549	7.8051	89870	89870	0	0
13.5799	7.7801	89550	89550	0	0
13.6049	7.7551	90920	90920	0	0
13.6299	7.7301	91410	91410	0	0
13.6549	7.7051	91540	91540	0	0
13.6799	7.6801	94450	94450	0	0
13.7049	7.6551	93390	93390	0	0
13.7299	7.6301	95130	95130	0	0
13.7549	7.6051	94610	94610	0	0
13.7799	7.5801	96360	96360	0	0
13.8049	7.5551	96550	96550	0	0
13.8299	7.5301	97450	97450	0	0
13.8549	7.5051	99300	99300	0	0
13.8799	7.4801	99600	99600	0	0
13.9049	7.4551	99230	99230	0	0
13.9299	7.4301	101270	101270	0	0
13.9549	7.4051	101890	101890	0	0
13.9799	7.3801	104000	104000	0	0
14.0049	7.3551	102280	102280	0	0
14.0299	7.3301	104290	104290	0	0
14.0549	7.3051	103280	103280	0	0
14.0799	7.2801	105770	105770	0	0
14.1049	7.2551	105980	105980	0	0
14.1299	7.2301	105800	105800	0	0
14.1549	7.2051	107350	107350	0	0
14.1799	7.1801	106930	106930	0	0
14.2049	7.1551	109970	109970	0	0
14.2299	7.1301	109780	109780	0	0
14.2549	7.1051	110340	110340	0	0
14.2799	7.0801	110250	110250	0	0
14.3049	7.0551	111930	111930	0	0
14.3299	7.0301	112670	112670	0	0
14.3549	7.0051	113560	113560	0	0
14.3799	6.9801	114920	114920	0	0
14.4049	6.9551	116150	116150	0	0
14.4299	6.9301	115540	115540	0	0
14.4549	6.9051	115650	115650	0	0
14.4799	6.8801	117680	117680	0	0
14.5049	6.8551	117040	117040	0	0
14.5299	6.8301	116340	116340	0	0
14.5549	6.8051	116900	116900	0	0
14.5799	6.7801	117820	117820	0	0
14.6049	6.7551	120230	120230	0	0
14.6299	6.7301	119330	119330	0	0
14.6549	6.7051	119150	119150	0	0
14.6799	6.6801	119210	119210	0	0
14.7049	6.6551	122020	122020	0	0
14.7299	6.6301	121130	121130	0	0
14.7549	6.6051	120080	120080	0	0
14.7799	6.5801	121760	121760	0	0
14.8049	6.5551	122840	122840	0	0
14.8299	6.5301	123150	123150	0	0
14.8549	6.5051	122110	122110	0	0
14.8799	6.4801	122670	122670	0	0
14.9049	6.4551	122860	122860	0	0
14.9299	6.4301	123070	123070	0	0
14.9549	6.4051	122480	122480	0	0
14.9799	6.3801	122260	122260	0	0
15.0049	6.3551	123550	123550	0	0
15.0299	6.3301	123390	123390	0	0
15.0549	6.3051	120030	120030	0	0
15.0799	6.2801	121730	121730	0	0
15.1049	6.2551	121780	121780	0	0
15.1299	6.2301	122840	122840	0	0
15.1549	6.2051	121660	121660	0	0
15.1799	6.1801	120860	120860	0	0
15.2049	6.1551	120900	120900	0	0
15.2299	6.1301	119610	119610	0	0
15.2549	6.1051	120220	120220	0	0
15.2799	6.0801	120550	120550	0	0
15.3049	6.0551	117830	117830	0	0
15.3299	6.0301	120140	120140	0	0
15.3549	6.0051	117480	117480	0	0
15.3799	5.9801	116830	116830	0	0
15.4049	5.9551	117260	117260	0	0
15.4299	5.9301	117530	117530	0	0
15.4549	5.9051	113300	113300	0	0
15.4799	5.8801	114350	114350	0	0
15.5049	5.8551	113460	113460	0	0
15.5299	5.8301	113090	113090	0	0
15.5549	5.8051	111130	111130	0	0
15.5799	5.7801	109560	109560	0	0
15.6049	5.7551	109420	109420	0	0
15.6299	5.7301	107300	107300	0	0
15.6549	5.7051	106390	106390	0	0
15.6799	5.6801	104650	104650	0	0
15.7049	5.6551	103320	103320	0	0
15.7299	5.6301	101950	101950	0	0
15.7549	5.6051	101290	101290	0	0
15.7799	5.5801	98250	98250	0	0
15.8049	5.5551	96250	96250	0	0
15.8299	5.5301	94860	94860	0	0
15.8549	5.5051	92320	92320	0	0
15.8799	5.4801	92410	92410	0	0
15.9049	5.4551	89670	89670	0	0
15.9299	5.4301	86090	86090	0	0
15.9549	5.4051	85060	85060	0	0
15.9799	5.3801	84490	84490	0	0
16.0049	5.3551	82160	82160	0	0
16.0299	5.3301	80090	80090	0	0
16.0549	5.3051	77600	77600	0	0
16.0799	5.2801	76430	76430	0	0
16.1049	5.2551	74340	74340	0	0
16.1299	5.2301	71840	71840	0	0
16.1549	5.2051	70630	70630	0	0
16.1799	5.1801	69180	69180	0	0
16.2049	5.1551	67860	67860	0	0
16.2299	5.1301	66500	66500	0	0
16.2549	5.1051	64380	64380	0	0
16.2799	5.0801	61970	61970	0	0
16.3049	5.0551	61730	61730	0	0
16.3299	5.0301	61260	61260	0	0
16.3549	5.0051	60090	60090	0	0
16.3799	4.9801	59310	59310	0	0
16.4049	4.9551	56990	56990	0	0
16.4299	4.9301	55580	55580	0	0
16.4549	4.9051	55870	55870	0	0
16.4799	4.8801	54030	54030	0	0
16.5049	4.8551	53550	53550	0	0
16.5299	4.8301	52730	52730	0	0
16.5549	4.8051	52750	52750	0	0
16.5799	4.7801	51010	51010	0	0
16.6049	4.7551	49370	49370	0	0
16.6299	4.7301	48950	48950	0	0
16.6549	4.7051	48490	48490	0	0
16.6799	4.6801	48620	48620	0	0
16.7049	4.6551	47210	47210	0	0
16.7299	4.6301	46600	46600	0	0
16.7549	4.6051	46190	46190	0	0
16.7799	4.5801	45560	45560	0	0
16.8049	4.5551	43970	43970	0	0
16.8299	4.5301	44100	44100	0	0
16.8549	4.5051	42970	42970	0	0
16.8799	4.4801	41870	41870	0	0
16.9049	4.4551	40520	40520	0	0
16.9299	4.4301	39830	39830	0	0
16.9549	4.4051	39230	39230	0	0
16.9799	4.3801	37490	37490	0	0
17.0049	4.3551	37730	37730	0	0
17.0299	4.3301	35820	35820	0	0
17.0549	4.3051	35870	35870	0	0
17.0799	4.2801	35200	35200	0	0
17.1049	4.2551	32850	32850	0	0
17.1299	4.2301	31960	31960	0	0
17.1549	4.2051	32120	32120	0	0
17.1799	4.1801	29720	29720	0	0
17.2049	4.1551	28950	28950	0	0
17.2299	4.1301	28760	28760	0	0
17.2549	4.1051	27480	27480	0	0
17.2799	4.0801	26020	26020	0	0
17.3049	4.0551	25000	25000	0	0
17.3299	4.0301	23890	23890	0	0
17.3549	4.0051	22810	22810	0	0
17.3799	3.9801	21980	21980	0	0
17.4049	3.9551	21270	21270	0	0
17.4299	3.9301	20530	20530	0	0
17.4549	3.9051	19360	19360	0	0
17.4799	3.8801	18300	18300	0	0
17.5049	3.8551	17140	17140	0	0
17.5299	3.8301	16660	16660	0	0
17.5549	3.8051	15600	15600	0	0
17.5799	3.7801	15250	15250	0	0
17.6049	3.7551	14140	14140	0	0
17.6299	3.7301	13470	13470	0	0
17.6549	3.7051	13670	13670	0	0
17.6799	3.6801	12950	12950	0	0
17.7049	3.6551	12070	12070	0	0
17.7299	3.6301	11880	11880	0	0
17.7549	3.6051	11250	11250	0	0
17.7799	3.5801	10880	10880	0	0
17.8049	3.5551	10420	10420	0	0
17.8299	3.5301	10260	10260	0	0
17.8549	3.5051	9430	9430	0	0
17.8799	3.4801	9320	9320	0	0
17.9049	3.4551	8910	8910	0	0
17.9299	3.4301	8320	8320	0	0
17.9549	3.4051	8570	8570	0	0
17.9799	3.3801	7850	7850	0	0
18.0049	3.3551	7320	7320	0	0
18.0299	3.3301	7480	7480	0	0
18.0549	3.3051	6900	6900	0	0
18.0799	3.2801	6590	6590	0	0
18.1049	3.2551	6130	6130	0	0
18.1299	3.2301	6070	6070	0	0
18.1549	3.2051	5970	5970	0	0
18.1799	3.1801	5910	5910	0	0
18.2049	3.1551	5410	5410	0	0
18.2299	3.1301	5110	5110	0	0
18.2549	3.1051	5190	5190	0	0
18.2799	3.0801	5080	5080	0	0
18.3049	3.0551	4960	4960	0	0
18.3299	3.0301	4650	4650	0	0
18.3549	3.0051	4160	4160	0	0
18.3799	2.9801	4260	4260	0	0
18.4049	2.9551	4130	4130	0	0
18.4299	2.9301	3920	3920	0	0
18.4549	2.9051	3790	3790	0	0
18.4799	2.8801	3620	3620	0	0
18.5049	2.8551	3530	3530	0	0
18.5299	2.8301	3380	3380	0	0
18.5549	2.8051	3300	3300	0	0
18.5799	2.7801	3190	3190	0	0
18.6049	2.7551	2930	2930	0	0
18.6299	2.7301	3190	3190	0	0
18.6549	2.7051	2950	2950	0	0
18.6799	2.6801	3020	3020	0	0
18.7049	2.6551	2760	2760	0	0
18.7299	2.6301	2750	2750	0	0
18.7549	2.6051	2500	2500	0	0
18.7799	2.5801	2630	2630	0	0
18.8049	2.5551	2340	2488.1	0.96817	14.8101
18.8299	2.5301	2240	2404.67	1.10024	16.4669
18.8549	2.5051	2410	2322.59	-0.56303	-8.74063
18.8799	2.4801	2350	2241.92	-0.705	-10.8075
18.9049	2.4551	2150	2166.45	0.11217	1.64467
18.9299	2.4301	2230	2088.65	-0.94653	-14.1348
18.9549	2.4051	2180	2012.39	-1.1352	-16.761
18.9799	2.3801	2040	1937.69	-0.71628	-10.2306
19.0049	2.3551	1870	1864.6	-0.0395	-0.54013
19.0299	2.3301	1860	1793.13	-0.4903	-6.68684
19.0549	2.3051	1740	1723.32	-0.12646	-1.66816
19.0799	2.2801	1780	1655.18	-0.93556	-12.4819
19.1049	2.2551	1600	1591.86	-0.06433	-0.81372
19.1299	2.2301	1470	1527.05	0.47051	5.70468
19.1549	2.2051	1230	1463.95	2.10947	23.3951
19.1799	2.1801	1420	1402.58	-0.14615	-1.7416
19.2049	2.1551	1400	1342.95	-0.48215	-5.7049
19.2299	2.1301	1090	1285.05	1.86828	19.5054
19.2549	2.1051	1140	1228.89	0.83255	8.88921
19.2799	2.0801	1260	1174.46	-0.76204	-8.55387
19.3049	2.0551	1060	1124.23	0.62382	6.42257
19.3299	2.0301	980	1073.15	0.94098	9.31524
19.3549	2.0051	1010	1023.78	0.13714	1.37821
19.3799	1.9801	890	976.1	0.91266	8.61001
19.4049	1.9551	950	930.089	-0.20428	-1.99108
19.4299	1.9301	840	885.73	0.49896	4.57301
19.4549	1.9051	720	843.001	1.44958	12.3001
19.4799	1.8801	740	801.878	0.71932	6.18784
19.5049	1.8551	710	762.337	0.62112	5.23368
19.5299	1.8301	570	726.123	2.0679	15.6123
19.5549	1.8051	600	689.588	1.15658	8.95881
19.5799	1.7801	580	654.549	0.97888	7.45491
19.6049	1.7551	560	620.974	0.81481	6.09744
19.6299	1.7301	640	588.831	-0.63961	-5.11688
19.6549	1.7051	600	558.086	-0.54111	-4.19144
19.6799	1.6801	700	528.703	-2.04739	-17.1297
19.7049	1.6551	510	500.647	-0.13097	-0.9353
19.7299	1.6301	580	475.128	-1.37704	-10.4872
19.7549	1.6051	530	449.558	-1.10496	-8.04421
19.7799	1.5801	470	425.206	-0.65338	-4.47937
19.8049	1.5551	470	402.036	-0.99136	-6.79645
19.8299	1.5301	480	380.008	-1.44326	-9.99923
19.8549	1.5051	370	359.085	-0.17944	-1.09151
19.8799	1.4801	330	339.229	0.16066	0.92292
19.9049	1.4551	430	320.403	-1.67134	-10.9597
19.9299	1.4301	360	303.395	-0.94341	-5.66046
19.9549	1.4051	270	286.47	0.31697	1.64704
19.9799	1.3801	250	270.465	0.40929	2.04645
20.0049	1.3551	350	255.341	-1.60003	-9.46588
20.0299	1.3301	250	241.064	-0.17871	-0.89357
20.0549	1.3051	250	227.598	-0.44803	-2.24016
20.0799	1.2801	310	214.909	-1.70789	-9.50914
20.1049	1.2551	340	202.961	-2.3502	-13.7039
20.1299	1.2301	340	192.241	-2.53405	-14.7759
20.1549	1.2051	170	181.646	0.28245	1.16459
20.1799	1.1801	210	171.696	-0.83586	-3.83038
20.2049	1.1551	250	162.361	-1.75278	-8.76392
20.2299	1.1301	170	153.61	-0.39753	-1.63905
20.2549	1.1051	200	145.413	-1.2206	-5.4587
20.2799	1.0801	130	137.743	0.21475	0.77429
20.3049	1.0551	130	130.572	0.01586	0.05717
20.3299	1.0301	170	123.873	-1.11875	-4.61271
20.3549	1.0051	130	117.909	-0.33535	-1.20912
20.3799	0.9801	190	112.059	-1.78808	-7.79407
20.4049	0.9551	220	106.609	-2.4175	-11.3391
20.4299	0.9301	160	101.536	-1.4616	-5.84639
20.4549	0.9051	150	96.8177	-1.37316	-5.31823
20.4799	0.8801	110	92.4331	-0.52966	-1.75669
20.5049	0.8551	160	88.3624	-1.79094	-7.16376
20.5299	0.8301	130	84.5864	-1.25955	-4.54136
20.5549	0.8051	90	81.2475	-0.29175	-0.87525
20.5799	0.7801	100	77.9951	-0.69586	-2.20049
20.6049	0.7551	110	74.986	-1.05571	-3.5014
20.6299	0.7301	100	72.2045	-0.87897	-2.77955
20.6549	0.7051	90	69.6356	-0.67881	-2.03644
20.6799	0.6801	90	67.2652	-0.75783	-2.27348
20.7049	0.6551	50	65.0798	0.67439	1.50798
20.7299	0.6301	50	63.0668	0.58437	1.30668
20.7549	0.6051	80	61.299	-0.66118	-1.8701
20.7799	0.5801	120	59.5887	-1.74392	-6.04113
20.8049	0.5551	120	58.0175	-1.78928	-6.19825
20.8299	0.5301	80	56.5752	-0.82819	-2.34248
20.8549	0.5051	60	55.2524	-0.19382	-0.47476
20.8799	0.4801	110	54.0404	-1.68725	-5.59596
20.9049	0.4551	90	52.9308	-1.23564	-3.70692
20.9299	0.4301	60	51.9159	-0.33003	-0.80841
20.9549	0.4051	20	51.0307	2.1942	3.10307
20.9799	0.3801	30	50.1801	1.1651	2.01801
21.0049	0.3551	130	49.4042	-2.23533	-8.05958
21.0299	0.3301	70	48.6969	-0.80518	-2.13031
21.0549	0.3051	60	48.0527	-0.48775	-1.19473
21.0799	0.2801	50	47.4666	-0.1133	-0.25334
21.1049	0.2551	70	46.9338	-0.87182	-2.30662
21.1299	0.2301	20	46.4499	1.87029	2.64499
21.1549	0.2051	30	46.0107	0.92438	1.60107
21.1799	0.1801	60	45.6306	-0.58663	-1.43694
21.2049	0.1551	80	45.2682	-1.22796	-3.47318
21.2299	0.1301	10	44.9401	3.49401	3.49401
21.2549	0.1051	10	44.6435	3.46435	3.46435
21.2799	0.0801	50	44.3754	-0.25154	-0.56246
21.3049	0.0551	30	44.1335	0.816	1.41335
21.3299	0.0301	30	43.9152	0.8034	1.39152
21.3549	0.0051	40	43.7186	0.18593	0.37186
21.3799	-0.0199	20	43.5495	1.6652	2.35495
21.4049	-0.0449	0	43.3894	0	4.33894
21.4299	-0.0699	0	43.2455	0	4.32455
21.4549	-0.0949	20	43.1163	1.63457	2.31163
21.4799	-0.1199	0	43.0004	0	4.30004
21.5049	-0.1449	0	42.8964	0	4.28964
21.5299	-0.1699	0	42.8034	0	4.28034
21.5549	-0.1949	0	42.7201	0	4.27201
21.5799	-0.2199	10	42.649	3.2649	3.2649
21.6049	-0.2449	0	42.5821	0	4.25821
21.6299	-0.2699	10	42.5224	3.25224	3.25224
21.6549	-0.2949	10	42.4692	3.24692	3.24692
21.6799	-0.3199	20	42.4217	1.58546	2.24217
21.7049	-0.3449	0	42.3795	0	4.23795
21.7299	-0.3699	0	42.342	0	4.2342
21.7549	-0.3949	20	42.3086	1.57746	2.23086
21.7799	-0.4199	20	42.279	1.57536	2.2279
21.8049	-0.4449	0	42.2539	0	4.22539
21.8299	-0.4699	0	42.2305	0	4.22305
21.8549	-0.4949	0	42.2097	0	4.22097
21.8799	-0.5199	0	42.1914	0	4.21914
21.9049	-0.5449	10	42.1752	3.21752	3.21752
21.9299	-0.5699	0	42.1608	0	4.21608
21.9549	-0.5949	10	42.1482	3.21482	3.21482
21.9799	-0.6199	0	42.1371	0	4.21371
22.0049	-0.6449	10	42.1277	3.21277	3.21277
22.0299	-0.6699	10	42.119	3.2119	3.2119
22.0549	-0.6949	0	42.1114	0	4.21114
22.0799	-0.7199	0	42.1046	0	4.21046
22.1049	-0.7449	0	42.0988	0	4.20988
22.1299	-0.7699	20	42.0936	1.56225	2.20936
22.1549	-0.7949	0	42.0891	0	4.20891
22.1799	-0.8199	10	42.0851	3.20851	3.20851
22.2049	-0.8449	0	42.0818	0	4.20818
22.2299	-0.8699	0	42.0787	0	4.20787
22.2549	-0.8949	0	42.0761	0	4.20761
22.2799	-0.9199	0	42.0737	0	4.20737
22.3049	-0.9449	20	42.0717	1.56071	2.20717
22.3299	-0.9699	0	42.07	0	4.207
22.3549	-0.9949	10	42.0684	3.20684	3.20684
22.3799	-1.0199	0	0	0	0
22.4049	-1.0449	10	10	0	0
22.4299	-1.0699	0	0	0	0
22.4549	-1.0949	10	10	0	0
22.4799	-1.1199	10	10	0	0
22.5049	-1.1449	0	0	0	0
22.5299	-1.1699	0	0	0	0
22.5549	-1.1949	0	0	0	0
22.5799	-1.2199	0	0	0	0
22.6049	-1.2449	0	0	0	0
22.6299	-1.2699	0	0	0	0
22.6549	-1.2949	10	10	0	0
22.6799	-1.3199	0	0	0	0
22.7049	-1.3449	0	0	0	0
22.7299	-1.3699	0	0	0	0
22.7549	-1.3949	0	0	0	0
22.7799	-1.4199	0	0	0	0
22.8049	-1.4449	0	0	0	0
22.8299	-1.4699	0	0	0	0
22.8549	-1.4949	10	10	0	0
22.8799	-1.5199	10	10	0	0
22.9049	-1.5449	10	10	0	0
22.9299	-1.5699	0	0	0	0
22.9549	-1.5949	0	0	0	0
22.9799	-1.6199	0	0	0	0
23.0049	-1.6449	0	0	0	0
23.0299	-1.6699	0	0	0	0
23.0549	-1.6949	0	0	0	0
23.0799	-1.7199	0	0	0	0
23.1049	-1.7449	0	0	0	0
23.1299	-1.7699	0	0	0	0
23.1549	-1.7949	0	0	0	0
23.1799	-1.8199	0	0	0	0
23.2049	-1.8449	0	0	0	0
23.2299	-1.8699	0	0	0	0
23.2549	-1.8949	0	0	0	0
23.2799	-1.9199	0	0	0	0
23.3049	-1.9449	0	0	0	0
23.3299	-1.9699	0	0	0	0
23.3549	-1.9949	0	0	0	0
23.3799	-2.0199	10	10	0	0
23.4049	-2.0449	0	0	0	0
23.4299	-2.0699	0	0	0	0
23.4549	-2.0949	0	0	0	0
23.4799	-2.1199	0	0	0	0
23.5049	-2.1449	0	0	0	0
23.5299	-2.1699	0	0	0	0
23.5549	-2.1949	10	10	0	0
23.5799	-2.2199	10	10	0	0
23.6049	-2.2449	0	0	0	0
23.6299	-2.2699	10	10	0	0
23.6549	-2.2949	10	10	0	0
