# Supplementary material for: Blue CdSe/CdS core/crown nanoplatelet light-emitting diodes obtained via a design-of-experiments approach
Source: Royal Society of Chemistry journal article supplement (doi:10.1039/d4nr03461a), 2024-11-13
Supplement: d4nr03461a1.zip [file input-output tables DoE _1 DoE_2 .xlsx]

## Sheet: Doe_1
Exp. N°	carboxylic acid chain length	Cadmium carboxylate amount	propionic acid amount	reaction time	injection temperature	growth temperature	PL QE	Itr	fQD
No.	#C	mmol	mmol	min	°C	°C	%	%	%
1	16	0.8	133	8	185	225	1.16	9.6	18.6
2	12	1.2	74	8	205	225	2.9	5	5.5
3	18	1	133	20	205	225	4.6	0.6	3.1
4	12	1.2	133	20	185	217.5	0.7	9.9	4.3
5	18	1.2	133	8	195	210	12.1	4.1	2.7
6	18	0.8	74	20	185	210	6.2	4.6	0
7	16	1	74	14	195	217.5	0.7	31.3	21.2
8	12	1	15	8	185	210	1.1	20.8	7.8
9	18	0.8	15	8	205	217.5	/	0	100
10	12	0.8	15	20	195	225	0.67	11.1	34.1
11	18	1.2	15	14	185	225	1.8	5.2	119.8
12	16	1.2	15	20	205	210	1.13	40	101.1
13	12	0.8	133	14	205	210	5.2	4.2	0

## Sheet: Doe_2
Exp. N°	Cadmium carboxylate amount	propionic acid amount	PL QE	Itr	fQD
No.	mmol	mmol	%	%	%
1	1.4	125	18.5	0	3
2	1.45	125	14.5	0.4	2
3	1.5	125	10.5	1.8	2.7
4	1.4	140	6.6	2	2.6
5	1.45	140	10	2.7	1.4
6	1.5	140	5	3.6	4.2
7	1.4	110	12.5	1.5	27.8
8	1.45	110	12.2	1.4	16.6
9	1.5	110	6.5	2.4	3.4
