# Supplementary material for: Blue CdSe/CdS core/crown nanoplatelet light-emitting diodes obtained via a design-of-experiments approach
Source: Royal Society of Chemistry journal article supplement (doi:10.1039/d4nr03461a), 2024-11-13
Supplement: d4nr03461a2.pdf [file d4nr03461a2.pdf]

# Blue CdSe/CdS Core/Crown Nanoplatelet Light-Emitting Diodes Obtained via a Design-of-Experiments Approach – Supporting Information

Matilde Cirignano,<sup>a,b</sup> Hossein Roshan,<sup>b</sup> Emanuele Farinini,<sup>a</sup> Alessio Di Giacomo,<sup>c</sup> Sergio Fiorito,<sup>b</sup> Davide Piccinotti,<sup>b</sup> Sirous Khabbazabkenar,<sup>b</sup> Francesco Di Stasio,<sup>b</sup> Iwan Moreels<sup>c</sup>

<sup>a</sup> Dipartimento di Chimica e Chimica Industriale, Università Degli Studi di Genova, Via Dodecaneso 31, 16146 Genoa, Italy

<sup>b</sup> Photonic Nanomaterials, Istituto Italiano di Tecnologia, Via Morego 30, 16163 Genoa, Italy. E-mail: [francesco.distasio@iit.it](mailto:francesco.distasio@iit.it)

<sup>c</sup> Department of Chemistry, Krijgslaan 281-S3, 9000 Gent, Belgium. E-mail: [iwan.moreels@ugent.be](mailto:iwan.moreels@ugent.be)

## SECTION 1: CdSe/CdS NPL synthesis parameters

| experiment | carboxylic acid chain length | carboxylic acid amount | propionic acid amount | reaction time | injection temperature | growth temperature |
|------------|------------------------------|------------------------|-----------------------|---------------|-----------------------|--------------------|
| No.        | #C                           | mmol                   | mmol                  | min           | °C                    | °C                 |
| 1          | 16                           | 0.8                    | 1.78                  | 8             | 185                   | 225                |
| 2          | 12                           | 1.2                    | 0.99                  | 8             | 205                   | 225                |
| 3          | 18                           | 1                      | 1.78                  | 20            | 205                   | 225                |
| 4          | 12                           | 1.2                    | 1.78                  | 20            | 185                   | 217.5              |
| 5          | 18                           | 1.2                    | 1.78                  | 8             | 195                   | 210                |
| 6          | 18                           | 0.8                    | 0.99                  | 20            | 185                   | 210                |
| 7          | 16                           | 1                      | 0.99                  | 14            | 195                   | 217.5              |
| 8          | 12                           | 1                      | 0.2                   | 8             | 185                   | 210                |
| 9          | 18                           | 0.8                    | 0.2                   | 8             | 205                   | 217.5              |
| 10         | 12                           | 0.8                    | 0.2                   | 20            | 195                   | 225                |
| 11         | 18                           | 1.2                    | 0.2                   | 14            | 185                   | 225                |
| 12         | 16                           | 1.2                    | 0.2                   | 20            | 205                   | 210                |
| 13         | 12                           | 0.8                    | 1.78                  | 14            | 205                   | 210                |

**Table S1.** Experimental parameters for the Definitive Screening Design of the 3.5 ML blue-emitting CdSe nanoplatelet synthesis. Every input factor has been varied over three different levels.

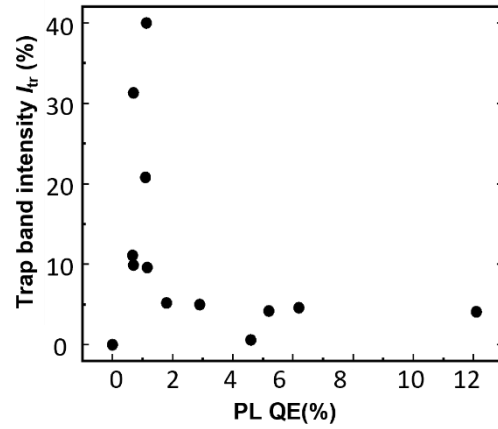

**Figure S1.** Evolution of the trap band intensity  $I_{tr}$  as a function of PL QE. In samples with high PL QE,  $I_{tr}$  is minimized accordingly.

|          | PL QE | $f_{QD}$    | $I_{tr}$ |
|----------|-------|-------------|----------|
| $b_0$    | -0.1  | 17.7        | 35.1     |
| $b_1$    | 1.4   | 17.4        | -3.7     |
| $b_2$    | 0.5   | 8.1         | 3.5      |
| $b_3$    | 1.9   | -33.4       | -4.9     |
| $b_4$    | -0.4  | 0.8         | 2.7      |
| $b_5$    | 0.3   | 5.9         | 0.0      |
| $b_6$    | -1.5  | 7.0         | -4.2     |
| $b_{11}$ | 3.3   | -20.9       | -23.4    |
| $b_{22}$ | 0.8   | 30.0        | -5.5     |
| $b_{33}$ | -0.9  | <b>32.7</b> | 0.5      |
| $b_{44}$ | 0.1   | -24.4       | 0.6      |
| $b_{55}$ | -2.8  | 17.1        | -2.4     |
| $b_{66}$ | 3.2   | -16.7       | 0.3      |

**Table S2.** Model coefficients for each response (PL QE, QD fraction  $f_{QD}$ , trap band intensity  $I_{tr}$ ). They are obtained through a multilinear regression of the responses, according to **equation 1** (see main text).

| experiment | carboxylic acid chain length | carboxylic acid amount | propionic acid amount | reaction time | injection temperature | growth temperature |
|------------|------------------------------|------------------------|-----------------------|---------------|-----------------------|--------------------|
| No.        | #C                           | mmol                   | mmol                  | min           | °C                    | °C                 |
| 14         | 18                           | 1.2                    | 2.67                  | 13            | 215                   | 250                |
| 15         | 18                           | 1.4                    | 1.67                  | 16            | 215                   | 220                |
| 16         | 18                           | 1.2                    | 1.80                  | 13            | 215                   | 250                |
| 17         | 18                           | 1.4                    | 0.94                  | 13            | 215                   | 250                |
| 18         | 18                           | 1.2                    | 0.94                  | 13            | 185                   | 220                |
| 19         | 18                           | 1.2                    | 2.67                  | 16.5          | 185                   | 250                |
| 20         | 18                           | 1                      | 2.67                  | 20            | 185                   | 220                |
| 21         | 18                           | 1                      | 0.94                  | 20            | 200                   | 250                |
| 22         | 18                           | 1.2                    | 1.80                  | 16.5          | 200                   | 235                |
| 23         | 18                           | 1.38                   | 1.67                  | 16            | 215                   | 220                |
| 24         | 18                           | 1.36                   | 1.67                  | 16            | 215                   | 220                |

**Table S3.** Experimental parameters for the second synthesis run of the 3.5 ML blue-emitting CdSe nanoplatelet synthesis. Every input factor has been varied over three different levels.

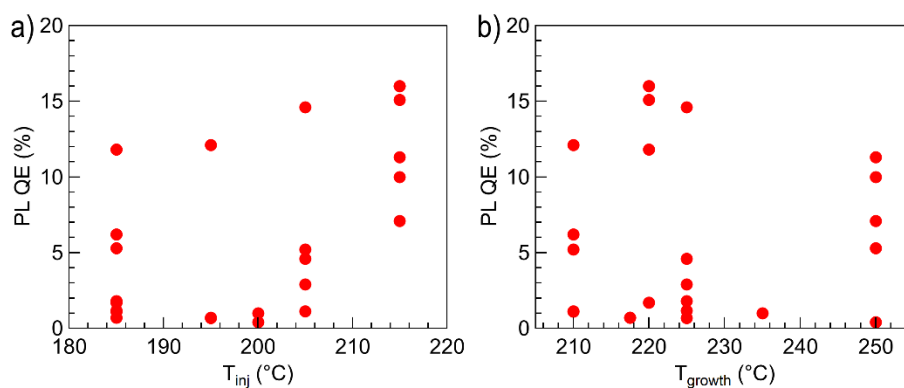

**Figure S2.** PL QE as a function of injection and growth temperature for the combined results of first and second run. An increase in PL QE is observed for higher injection temperature, while there is no clear dependency on the growth temperature.

|          | PL QE | $f_{QD}$ | $I_{tr}$ |
|----------|-------|----------|----------|
| $b_0$    | 16.0  | 2.2      | 0.5      |
| $b_2$    | -2.6  | -3.9     | 0.7      |
| $b_3$    | -1.6  | -6.6     | 0.5      |
| $b_{23}$ | 1.1   | 6.5      | 0.2      |
| $b_{22}$ | -2.3  | 0.6      | 0.4      |
| $b_{33}$ | -5.7  | 6.8      | 1.5      |

**Table S4.** Model coefficients of multilinear regression model for each response (PL QE, QD fraction  $f_{QD}$ , trap band intensity  $I_{tr}$ ), for the central composite face-centered design.

## SECTION 2: LED fabrication

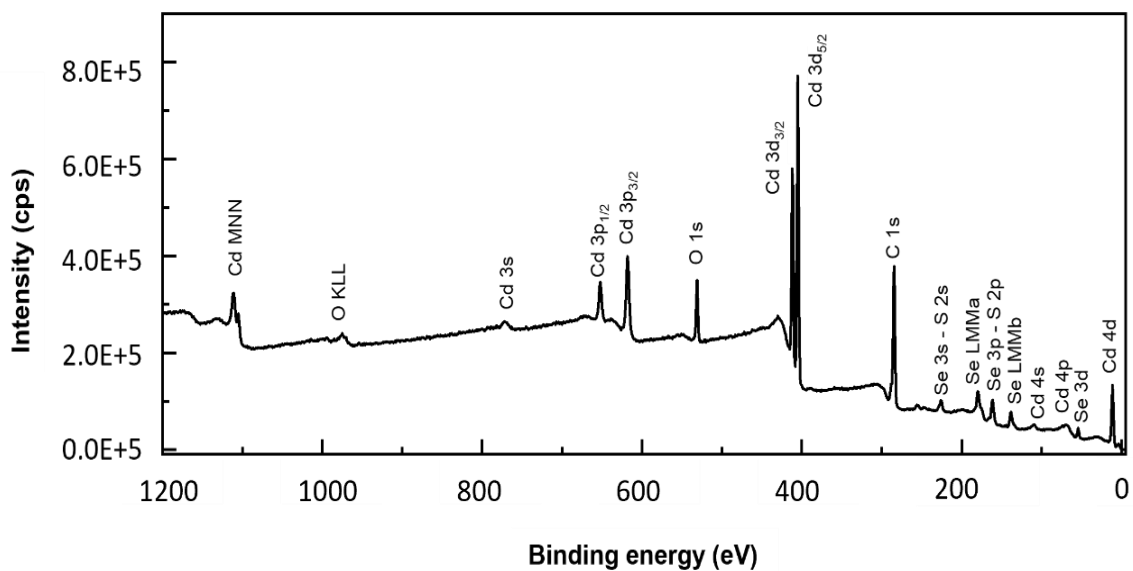

**Figure S3.** Low-resolution XPS spectrum, where peaks for Cd, Se, C, O are evident.

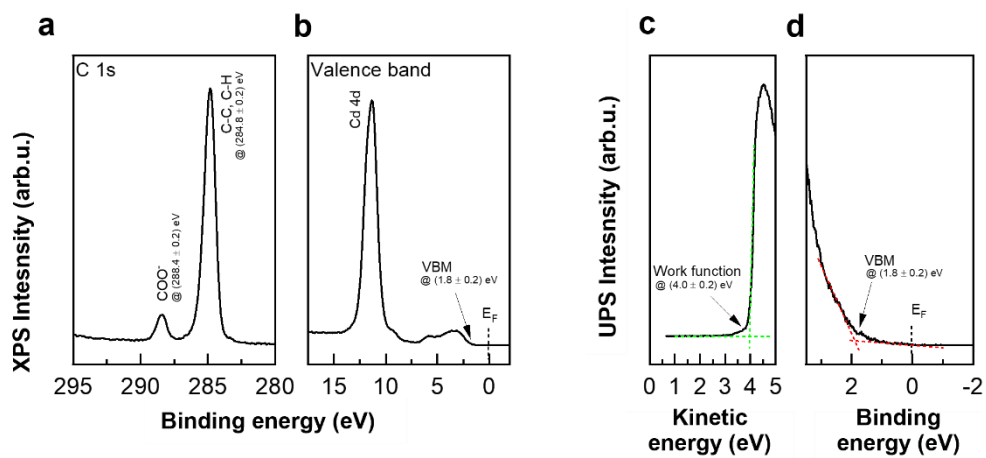

**Figure S4.** (Left) high-resolution XPS spectra, (right) high-resolution UPS spectra.

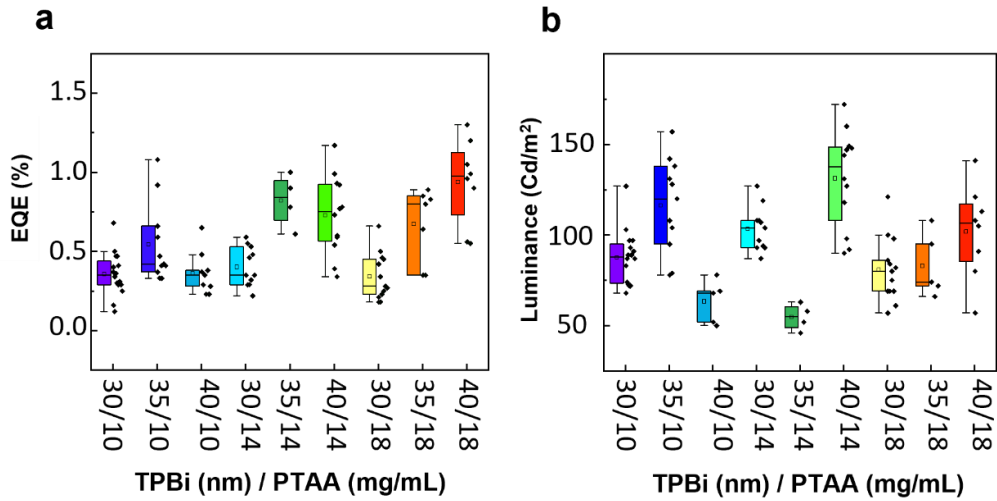

**Figure S5:** EQE (left) and luminance (right) for 8 LED samples prepared via the central composite face-centered design. Device 30-14 device is omitted because the luminance was an outlier. We report on the individual values of measurable pixels (maximum 6) in each device, together with the average value ( $\square$ ), median line and standard deviation (box).

| Term                   | EQE (%) |
|------------------------|---------|
| $d_0$                  | 1.60    |
| $d_1$                  | 0.21    |
| $d_2$                  | 0.04    |
| $d_{12}$               | 0.46    |
| $d_{11}$               | -0.52   |
| $d_{22}$               | -0.03   |
| Explained Variance [%] | 57      |
| SD of the residuals    | 0.34    |

$$y = d_0 + d_1X_2 + d_2X_3 + d_{12}X_2X_3 + d_{11}X_2^2 + d_{22}X_3^2$$

**Table S5.** List of coefficients for the CCF model, explained variance of EQE response and standard deviation (SD) of the residuals. We also report the model equation below.

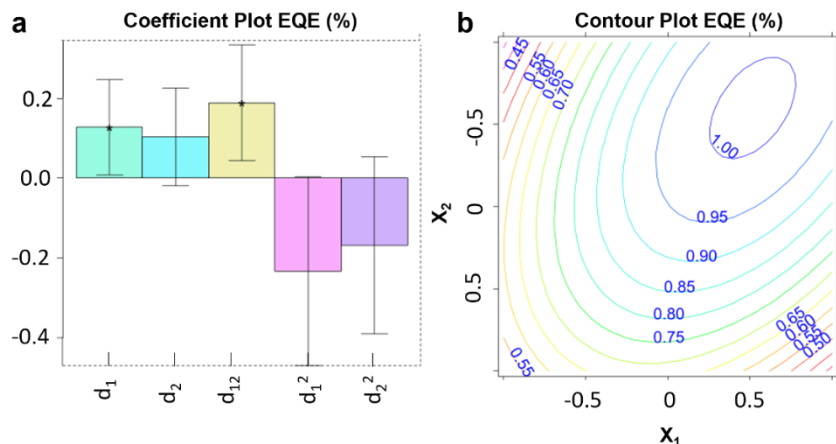

**Figure S6.** Coefficient plot (left) for EQE of CCF (Face-centered Central Composite Design) of LED fabrication: cross term TPBi\*PTAA ( $d_{12}$ ) shows significance. Contour plot for EQE% of CCF showing an optimum zone located at high level of PTAA (mg/mL) and TPBi (nm).

| Emissive material                                      | PL peak position (nm) | FWHM of PL (nm) | EL peak position (nm) | FWHM of EL (nm) | PL → EL broadening (nm) | Ref.             |
|--------------------------------------------------------|-----------------------|-----------------|-----------------------|-----------------|-------------------------|------------------|
| CdSe/CdxZn1-xS/ZnS QRs                                 | 465                   | 26              | 472                   | 30              | 4                       | 1                |
| Zn <sub>x</sub> Cd <sub>1-x</sub> S/ZnS core/shell QDs | 442                   | 21              | 445                   | 25              | 4                       | 2                |
| CdSe/CdS core/shell NPLs                               | 556                   | 12              | 560                   | 14              | 2                       | 3                |
| CdSe/CdS core/crown NPLs                               | 515                   | 8               | 516                   | 10              | 2                       | 4                |
| CdSe/CdS core/crown NPLs                               | 461                   | 10              | 467                   | 11              | 1                       | 5                |
| <b>CdSe/CdS core/crown NPLs</b>                        | <b>465</b>            | <b>14</b>       | <b>467</b>            | <b>16</b>       | <b>2</b>                | <b>This Work</b> |

**Table S6.** Photoluminescence and electroluminescence peak position and full-width-at-half-maximum for different literature sources on quantum rods (QRs), quantum dots (QDs) and nanoplatelets (NPLs).

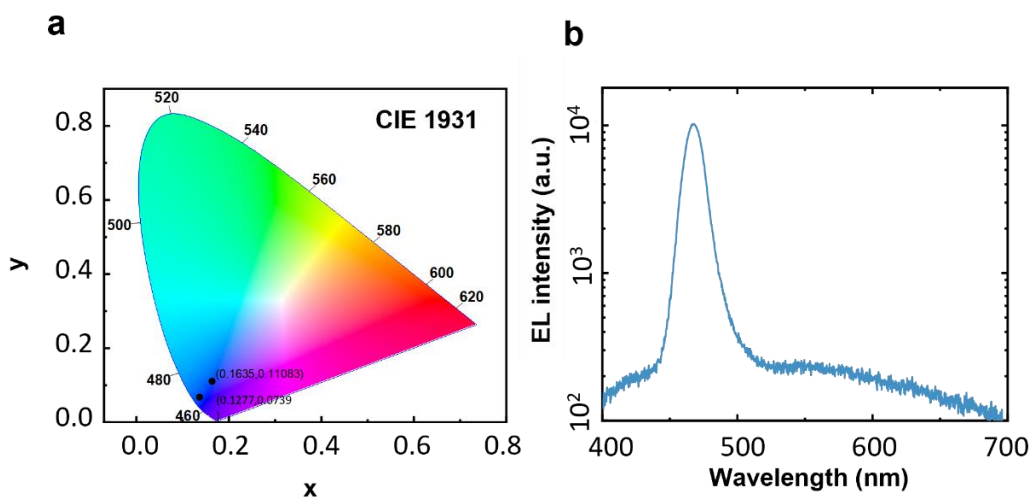

**Figure S7.** (a) CIE diagram of the electroluminescence of a typical blue-emitting CdSe/CdS LED without 525 nm short-pass filter (0.1635,0.11083) and with a (simulated) 525 nm short-pass filter (0.1277,0.0739). (b) EL of CdSe/CdS LED at 6V in logarithmic scale with a residual weak trap band centered at 550 nm.

## REFERENCES

1. Mallem et al., *ACS Appl. Mater. Interfaces*, **2022**, 14, 18723–18735.
2. Shen et al., *Nanoscale*, **2017**, 9, 13583–13591
3. Zhang et al., *Nanoscale*, **2016**, 8, 12182–12188
4. Yang et al., *IEEE Trans. Nanotechnol.*, **2019**, 18, 220–225
5. Hu et al., *Small*, **2022**, 18, 2204120
